# Supplementary material for: Polyglutamine-expanded ataxin3 alter specific gene expressions through changing DNA methylation status in SCA3/MJD
Source: Aging (Albany NY). 2020 Dec 19;13(3):3680–98. doi: 10.18632/aging.202331 (PMC7906150; doi:10.18632/aging.202331)
Supplement: Supplementary Table 6 [file aging-13-202331-s002.xlsx]

## Sheet: dmr_234_lt_789_merge.sig4.mod
Supplementary Table 6. Differential methylated regions (DMRs) detected between control and SCA3/MJD cerebellum samples. Compared to control group, 62 DMRs were found hypomethylated in SCA3/MJD group.
PeakID (cmd=annotatePeaks.pl dmr_234_lt_789_merge.sig4.mod mm10)	Chr	Start	End	Strand	Peak Score	Focus Ratio/Region Size	Annotation	Detailed Annotation	Distance to TSS	Nearest PromoterID 最近的启动子	Entrez ID	Nearest Unigene	Nearest Refseq	Nearest Ensembl	Gene Name	Gene Alias	Gene Description	Gene Type
DMR12	chr11	87027733	87027840	+	0	NA	intron (NR_106195, intron 4 of 8)	B1_Mm|SINE|Alu	-34024	NM_001005341	77864	Mm.191894	NM_001005341	ENSMUSG00000018427	Ypel2	6430570G24|E130113K08Rik	yippee-like 2 (Drosophila)	protein-coding
DMR19	chr13	60481063	60481329	+	0	NA	Intergenic	Intergenic	-120751	NM_001285917	69635	Mm.24103	NM_029653	ENSMUSG00000021559	Dapk1	D13Ucla1|DAP-Kinase	death associated protein kinase 1	protein-coding
DMR1	chr1	24837419	24837572	+	0	NA	Intergenic	L1Md_F2|LINE|L1	158951	NM_026719	68421	Mm.336563	NM_026719	ENSMUSG00000073725	Lmbrd1	0910001K20Rik|AV347960	LMBR1 domain containing 1	protein-coding
DMR8	chr10	81846498	81846704	+	0	NA	Intergenic	CpG	-17333	NM_001243067	73610	Mm.490466	NM_001243067		Zfp433	1700123A16Rik	RIKEN cDNA 1700123A16 gene	protein-coding
DMR36	chr18	56828637	56829643	+	0	NA	intron (NM_177115, intron 1 of 4)	RLTR10-int|LTR|ERVK	96408	NM_177115	320253	Mm.312623	NM_177115	ENSMUSG00000032656	43893	6330411I15Rik|A530081L18Rik|AI843639|MARCH-III	membrane-associated ring finger (C3HC4) 3	protein-coding
DMR33	chr17	39847792	39848221	+	0	NA	non-coding (NR_046233, exon 1 of 1)	non-coding (NR_046233, exon 1 of 1)	5009	NR_046233	100861531		NR_046233		Rn45s	-	45S pre-ribosomal RNA	rRNA
DMR26	chr17	39843624	39843791	+	0	NA	non-coding (NR_046233, exon 1 of 1)	non-coding (NR_046233, exon 1 of 1)	710	NR_046233	100861531		NR_046233		Rn45s	-	45S pre-ribosomal RNA	rRNA
DMR18	chr13	38580276	38580390	+	0	NA	Intergenic	Intergenic	-51509	NM_001289598	105245	Mm.28622	NM_145367	ENSMUSG00000038991	Txndc5	AL022641|ERp46|PC-TRP	thioredoxin domain containing 5	protein-coding
DMR43	chr3	34570109	34570356	+	0	NA	intron (NR_015580, intron 2 of 4)	intron (NR_015580, intron 2 of 4)	9851	NR_015580	320478	Mm.444063	NR_015580		Sox2ot	B230215L15Rik	SOX2 overlapping transcript (non-protein coding)	ncRNA
DMR23	chr16	76679973	76680380	+	0	NA	Intergenic	Intergenic	-307127	NM_173440	268903	Mm.74711	NM_173440	ENSMUSG00000048490	Nrip1	6030458L20Rik|8430438I05Rik|9630050P12|AA959574|AW456757|RIP140	nuclear receptor interacting protein 1	protein-coding
DMR11	chr11	69119250	69120466	+	0	NA	promoter-TSS (NM_033041)	promoter-TSS (NM_033041)	-595	NM_033041	84653	Mm.98505	NM_033041		Hes7	bHLHb37	hairy and enhancer of split 7 (Drosophila)	protein-coding
DMR54	chr7	143340682	143341074	+	0	NA	intron (NM_008434, intron 11 of 15)	intron (NM_008434, intron 11 of 15)	-10228	NR_045842	71153	Mm.398340	NR_045842		4933417O13Rik	-	RIKEN cDNA 4933417O13 gene	ncRNA
DMR48	chr6	114488866	114489903	+	0	NA	Intergenic	(CA)n|Simple_repeat|Simple_repeat	85718	NM_001252643	15465	Mm.333327	NM_008285	ENSMUSG00000053004	Hrh1	Bphs|H1R|HH1R|Hir	histamine receptor H1	protein-coding
DMR40	chr2	61816079	61816349	+	0	NA	Intergenic	Intergenic	11761	NM_009322	21375	Mm.308525	NM_009322	ENSMUSG00000035033	Tbr1	-	T-box brain gene 1	protein-coding
DMR20	chr16	11144043	11144143	+	0	NA	intron (NR_027502, intron 19 of 22)	LSU-rRNA_Hsa|rRNA|rRNA	-9561	NM_029582	106200	Mm.291015	NM_029582	ENSMUSG00000022498	Txndc11	2810408E11Rik|AI427833|EFP1|Txdc11	thioredoxin domain containing 11	protein-coding
DMR3	chr1	74793445	74793552	+	0	NA	exon (NM_009518, exon 2 of 4)	exon (NM_009518, exon 2 of 4)	1479	NM_009518	22409	Mm.5130	NM_009518		Wnt10a	-	wingless-type MMTV integration site family, member 10A	protein-coding
DMR52	chr7	18359819	18359992	+	0	NA	Intergenic	L1Md_F2|LINE|L1	-4898	NM_011963	26438	Mm.89991	NM_011963	ENSMUSG00000003505	Psg18	Cea-3|Cea3|mmCGM6	pregnancy specific glycoprotein 18	protein-coding
DMR24	chr16	89896499	89898155	+	0	NA	intron (NM_001145886, intron 4 of 27)	intron (NM_001145886, intron 4 of 27)	63500	NM_009384	21844	Mm.310902	NM_009384	ENSMUSG00000002489	Tiam1	AI847750|D16Ium10|D16Ium10e	T cell lymphoma invasion and metastasis 1	protein-coding
DMR6	chr10	7478121	7479774	+	0	NA	Intergenic	MMERGLN-int|LTR|ERV1	-5470	NM_029975	77777	Mm.442442	NM_029975	ENSMUSG00000079685	Ulbp1	A430108B07Rik|MULT1	UL16 binding protein 1	protein-coding
DMR41	chr2	168977974	168978442	+	0	NA	promoter-TSS (NR_040326)	promoter-TSS (NR_040326)	-61	NR_040326	75508	Mm.271256	NR_040326	ENSMUSG00000086348	1700017J07Rik	-	RIKEN cDNA 1700017J07 gene	ncRNA
DMR38	chr19	40147055	40147110	+	0	NA	Intergenic	L1Md_T|LINE|L1	40204	NM_145499	226105	Mm.29119	NM_145499	ENSMUSG00000060613	Cyp2c70	-	cytochrome P450, family 2, subfamily c, polypeptide 70	protein-coding
DMR31	chr17	39846333	39846540	+	0	NA	non-coding (NR_046233, exon 1 of 1)	non-coding (NR_046233, exon 1 of 1)	3439	NR_046233	100861531		NR_046233		Rn45s	-	45S pre-ribosomal RNA	rRNA
DMR25	chr16	90291030	90291332	+	0	NA	Intergenic	RMER17C|LTR|ERVK	-6756	NM_178923	224432	Mm.439811	NM_178923	ENSMUSG00000022983	Scaf4	AA517739|Sfrs15|Sra4|Srsf15	SR-related CTD-associated factor 4	protein-coding
DMR9	chr11	18107911	18107990	+	0	NA	Intergenic	RLTR10-int|LTR|ERVK	-154075	NM_026576	68145	Mm.178684	NM_026576	ENSMUSG00000016984	Etaa1	5730466H23Rik|AA672646	Ewing tumor-associated antigen 1	protein-coding
DMR32	chr17	39847196	39847333	+	0	NA	non-coding (NR_046233, exon 1 of 1)	non-coding (NR_046233, exon 1 of 1)	4267	NR_046233	100861531		NR_046233		Rn45s	-	45S pre-ribosomal RNA	rRNA
DMR42	chr3	5860474	5860758	+	0	NA	Intergenic	LSU-rRNA_Hsa|rRNA|rRNA	-284368	NM_001163305	19302	Mm.132336	NM_008994	ENSMUSG00000040374	Pex2	D3Ertd138e|PAF-1|PMP35|Pxmp3	peroxisomal biogenesis factor 2	protein-coding
DMR59	chr9	69436988	69437331	+	0	NA	Intergenic	Intergenic	-16524	NM_007585	12306	Mm.238343	NM_007585	ENSMUSG00000032231	Anxa2	AW215814|Cal1h	annexin A2	protein-coding
DMR50	chr7	16199580	16199855	+	0	NA	exon (NM_027883, exon 14 of 17)	exon (NM_027883, exon 14 of 17)	22276	NM_001285931	71723	Mm.75259	NM_027883	ENSMUSG00000006019	Dhx34	1200013B07Rik|1810012L18Rik|Ddx34|mKIAA0134	DEAH (Asp-Glu-Ala-His) box polypeptide 34	protein-coding
DMR47	chr5	146261016	146261095	+	0	NA	intron (NM_153599, intron 2 of 12)	LSU-rRNA_Hsa|rRNA|rRNA	29380	NM_153599	264064	Mm.260576	NM_153599	ENSMUSG00000029635	Cdk8	-	cyclin-dependent kinase 8	protein-coding
DMR5	chr1	120601952	120602809	+	0	NA	promoter-TSS (NR_040326)	promoter-TSS (NR_040326)	-107	NM_010133	13798	Mm.2657	NM_010133		En1	En-1|Mo-en.1	engrailed 1	protein-coding
DMR60	chrX	12157467	12157839	+	0	NA	intron (NR_045434, intron 1 of 3)	intron (NR_045434, intron 1 of 3)	2693	NR_045434	72937	Mm.440386	NR_045434	ENSMUSG00000087271	2900008C10Rik	-	RIKEN cDNA 2900008C10 gene	ncRNA
DMR35	chr18	43581816	43582037	+	0	NA	exon (NM_001163637, exon 3 of 22)	exon (NM_001163637, exon 3 of 22)	105847	NM_001163637	76217	Mm.134602	NM_001163637	ENSMUSG00000024502	Jakmip2	6430702L21Rik|AI850334|D930046L20Rik	janus kinase and microtubule interacting protein 2	protein-coding
DMR46	chr5	112644152	112644256	+	0	NA	Intergenic	Intergenic	-54208	NR_045396	67325	Mm.490791	NR_045396	ENSMUSG00000097962	1700034G24Rik	-	RIKEN cDNA 1700034G24 gene	ncRNA
DMR29	chr17	39845656	39845667	+	0	NA	non-coding (NR_046233, exon 1 of 1)	non-coding (NR_046233, exon 1 of 1)	2664	NR_046233	100861531		NR_046233		Rn45s	-	45S pre-ribosomal RNA	rRNA
DMR21	chr16	30068713	30069888	+	0	NA	Intergenic	Intergenic	3943	NM_008235	15205	Mm.390859	NM_008235	ENSMUSG00000022528	Hes1	Hry|bHLHb39	hairy and enhancer of split 1 (Drosophila)	protein-coding
DMR56	chr8	91171088	91171358	+	0	NA	Intergenic	Intergenic	-35727	NM_010241	14339	Mm.324588	NM_010241	ENSMUSG00000031667	Aktip	AL023020|Fif|Ft|Ft1|Fts	thymoma viral proto-oncogene 1 interacting protein	protein-coding
DMR53	chr7	30136976	30137178	+	0	NA	Intergenic	Intergenic	15129	NM_001081007	233060	Mm.443484	NM_001081007	ENSMUSG00000074220	Zfp382	5930415A09Rik|Znf382	zinc finger protein 382	protein-coding
DMR30	chr17	39846237	39846281	+	0	NA	non-coding (NR_046233, exon 1 of 1)	non-coding (NR_046233, exon 1 of 1)	3262	NR_046233	100861531		NR_046233		Rn45s	-	45S pre-ribosomal RNA	rRNA
DMR2	chr1	46424690	46424847	+	0	NA	Intergenic	Intergenic	358030	NM_001160386	227058	Mm.296880	NM_001160386	ENSMUSG00000041144	Dnah7b	Dnahc7b|Gm107	dynein, axonemal, heavy chain 7B	protein-coding
DMR39	chr2	24607525	24608120	+	0	NA	intron (NM_007579, intron 44 of 45)	intron (NM_007579, intron 44 of 45)	-132223	NM_011040	18510	Mm.2533	NM_011040	ENSMUSG00000026976	Pax8	Pax-8	paired box 8	protein-coding
DMR62	chrY	90800211	90800484	+	0	NA	intron (NM_133362, intron 2 of 2)	intron (NM_133362, intron 2 of 2)	14905	NM_133362	170942	Mm.391385	NM_133362	ENSMUSG00000096768	Erdr1	edr	erythroid differentiation regulator 1	protein-coding
DMR7	chr10	42690649	42691007	+	0	NA	intron (NM_172416, intron 2 of 5)	intron (NM_172416, intron 2 of 5)	11912	NM_172416	14628	Mm.46636	NM_172416	ENSMUSG00000038280	Ostm1	1200002H13Rik|HSPC019|gl	osteopetrosis associated transmembrane protein 1	protein-coding
DMR61	chrY	90798826	90799099	+	0	NA	intron (NM_133362, intron 2 of 2)	intron (NM_133362, intron 2 of 2)	13520	NM_133362	170942	Mm.391385	NM_133362	ENSMUSG00000096768	Erdr1	edr	erythroid differentiation regulator 1	protein-coding
DMR16	chr11	120169077	120169308	+	0	NA	Intergenic	Intergenic	-17841	NM_001164798	72055	Mm.253403	NM_024249	ENSMUSG00000061306	Slc38a10	1810073N04Rik	solute carrier family 38, member 10	protein-coding
DMR27	chr17	39844745	39844815	+	0	NA	non-coding (NR_046233, exon 1 of 1)	non-coding (NR_046233, exon 1 of 1)	1783	NR_046233	100861531		NR_046233		Rn45s	-	45S pre-ribosomal RNA	rRNA
DMR51	chr7	16472166	16473084	+	0	NA	intron (NM_008718, intron 3 of 11)	intron (NM_008718, intron 3 of 11)	4155	NM_008718	18142	Mm.145821	NM_008718	ENSMUSG00000001988	Npas1	MOP5|bHLHe11	neuronal PAS domain protein 1	protein-coding
DMR44	chr4	136699367	136700536	+	0	NA	intron (NM_001290753, intron 3 of 15)	intron (NM_001290753, intron 3 of 15)	77330	NM_001243262	242707	Mm.448979	NM_001243262	ENSMUSG00000070683	Lactbl1	-	lactamase, beta-like 1	protein-coding
DMR37	chr18	68302908	68302985	+	0	NA	intron (NM_001170953, intron 1 of 9)	ORR1D1|LTR|ERVL-MaLR	2591	NM_001170953	67897	Mm.27544	NM_026440	ENSMUSG00000009535	Rnmt	2610002P10Rik|AI848273|Rg7mt1|mKIAA0398	RNA (guanine-7-) methyltransferase	protein-coding
DMR13	chr11	103355441	103356278	+	0	NA	intron (NM_001205236, intron 3 of 17)	intron (NM_001205236, intron 3 of 17)	7833	NM_183288	544817	Mm.259113	NM_133715	ENSMUSG00000034255	Arhgap27	2310069I04Rik|5730442P18Rik|Gm21552|Sh3d20	Rho GTPase activating protein 27	protein-coding
DMR22	chr16	74578239	74578547	+	0	NA	Intergenic	L1Md_A|LINE|L1	-167481	NM_175549	268902	Mm.171736	NM_175549	ENSMUSG00000052516	Robo2	2600013A04Rik|9430089E08Rik|BB097918|D230004I22Rik|mKIAA1568	roundabout homolog 2 (Drosophila)	protein-coding
DMR49	chr6	118350442	118350643	+	0	NA	Intergenic	Intergenic	-41823	NR_110507	102632423	Mm.261755	NR_110507		LOC102632423	-	uncharacterized LOC102632423	ncRNA
DMR14	chr11	113148206	113148623	+	0	NA	intron (NR_015556, intron 1 of 2)	PB1D10|SINE|Alu	53424	NR_015556	72386	Mm.266961	NR_015556	ENSMUSG00000087259	2610035D17Rik	-	RIKEN cDNA 2610035D17 gene	ncRNA
DMR55	chr8	3994338	3994388	+	0	NA	Intergenic	CpG	-47500	NM_130903	170776	Mm.215729	NM_130903	ENSMUSG00000040165	Cd209c	SIGNR2|mSIGNR2	CD209c antigen	protein-coding
DMR15	chr11	114690408	114690709	+	0	NA	intron (NM_053273, intron 3 of 13)	intron (NM_053273, intron 3 of 13)	15090	NM_053273	117160	Mm.271934	NM_053273	ENSMUSG00000034714	Ttyh2	1110001A03Rik	tweety homolog 2 (Drosophila)	protein-coding
DMR17	chr12	112277209	112277791	+	0	NA	Intergenic	Intergenic	131292	NM_001097621	668303	Mm.313104	NM_001097621	ENSMUSG00000021294	Kif26a	mKIAA1236	kinesin family member 26A	protein-coding
DMR58	chr9	61904165	61907092	+	0	NA	Intergenic	Intergenic	8882	NM_018853	56040	Mm.3158	NM_018853	ENSMUSG00000007892	Rplp1	2410042H16Rik|Arpp1|C430017H15Rik	ribosomal protein, large, P1	protein-coding
DMR10	chr11	21997728	21998325	+	0	NA	intron (NM_011023, intron 4 of 4)	intron (NM_011023, intron 4 of 4)	3625	NM_011023	18423	Mm.129663	NM_011023	ENSMUSG00000005917	Otx1	A730044F23Rik|jv	orthodenticle homolog 1	protein-coding
DMR4	chr1	91017672	91017796	+	0	NA	intron (NM_001111312, intron 1 of 12)	intron (NM_001111312, intron 1 of 12)	19007	NM_001111312	16978	Mm.45039	NM_008515	ENSMUSG00000026305	Lrrfip1	AU024550|Fliiap1	leucine rich repeat (in FLII) interacting protein 1	protein-coding
DMR34	chr17	39848622	39848700	+	0	NA	non-coding (NR_046233, exon 1 of 1)	non-coding (NR_046233, exon 1 of 1)	5664	NR_046233	100861531		NR_046233		Rn45s	-	45S pre-ribosomal RNA	rRNA
DMR57	chr8	111424369	111425727	+	0	NA	Intergenic	Lx8b|LINE|L1	-25152	NR_105819	102466970		NR_105819	miRBase:MI0021929	Mir1957b	mmu-mir-1957b	microRNA mir-1957b	ncRNA
DMR45	chr5	106163905	106164046	+	0	NA	Intergenic	Intergenic	287407	NM_018759	54367	Mm.248876	NM_018759	ENSMUSG00000029290	Zfp326	5730470H14Rik|ZAN75|Znf326	zinc finger protein 326	protein-coding
DMR28	chr17	39845092	39845148	+	0	NA	non-coding (NR_046233, exon 1 of 1)	non-coding (NR_046233, exon 1 of 1)	2123	NR_046233	100861531		NR_046233		Rn45s	-	45S pre-ribosomal RNA	rRNA
