# Supplementary material for: Polyglutamine-expanded ataxin3 alter specific gene expressions through changing DNA methylation status in SCA3/MJD
Source: Aging (Albany NY). 2020 Dec 19;13(3):3680–98. doi: 10.18632/aging.202331 (PMC7906150; doi:10.18632/aging.202331)
Supplement: Supplementary Table 7 [file aging-13-202331-s003.xlsx]

## Sheet: dmr_789_lt_234_merge.sig4.mod
Supplementary Table 7. Differential methylated regions (DMRs) detected between control and SCA3/MJD cerebellum samples. Compared to control group, 73 DMRs were found hypermethylated in SCA3/MJD group.
PeakID (cmd=annotatePeaks.pl dmr_789_lt_234_merge.sig4.mod mm10)	Chr	Start	End	Strand	Peak Score	Focus Ratio/Region Size	Annotation	Detailed Annotation	Distance to TSS	Nearest PromoterID	Entrez ID	Nearest Unigene	Nearest Refseq	Nearest Ensembl	Gene Name	Gene Alias	Gene Description	Gene Type
DMR66	chr8	75339639	75339693	+	0	NA	Intergenic	L1Md_T|LINE|L1	-109028	NM_027944	71831	Mm.443238	NM_027944	ENSMUSG00000031620	1700007B14Rik	-	RIKEN cDNA 1700007B14 gene	protein-coding
DMR12	chr11	97542225	97542753	+	0	NA	intron (NM_018873, intron 4 of 19)	intron (NM_018873, intron 4 of 19)	32637	NM_018873	56013	Mm.342665	NM_018873	ENSMUSG00000038453	Srcin1	P140|SNIP|mKIAA1684|p140Cap	SRC kinase signaling inhibitor 1	protein-coding
DMR33	chr15	82207343	82207411	+	0	NA	exon (NM_001207021, exon 4 of 4)	exon (NM_001207021, exon 4 of 4)	5438	NM_001207021	435145	Mm.41289	NM_001207021	ENSMUSG00000096883	AI848285	Orf26	expressed sequence AI848285	protein-coding
DMR26	chr12	23800783	23800879	+	0	NA	Intergenic	CpG	296438	NM_001256489	66808	Mm.379124	NM_001256489		9030624G23Rik	-	RIKEN cDNA 9030624G23 gene	protein-coding
DMR43	chr2	93643541	93644069	+	0	NA	intron (NM_007442, intron 1 of 3)	intron (NM_007442, intron 1 of 3)	1371	NM_007442	11695	Mm.389389	NM_007442	ENSMUSG00000040310	Alx4	lst	aristaless-like homeobox 4	protein-coding
DMR40	chr2	33643514	33644607	+	0	NA	non-coding (NR_046275, exon 3 of 3)	non-coding (NR_046275, exon 3 of 3)	2867	NR_046275	100504399	Mm.72070	NM_177842		C130021I20Rik	-	Riken cDNA C130021I20 gene	ncRNA
DMR20	chr12	19044105	19044324	+	0	NA	Intergenic	CpG	529704	NM_001201330	236366	Mm.352227	NM_001033157		5730507C01Rik	-	RIKEN cDNA 5730507C01 gene	protein-coding
DMR3	chr1	75422293	75422810	+	0	NA	exon (NM_007463, exon 30 of 41)	exon (NM_007463, exon 30 of 41)	-13392	NM_133708	69080	Mm.23951	NM_133708	ENSMUSG00000033021	Gmppa	1810012N01Rik	GDP-mannose pyrophosphorylase A	protein-coding
DMR52	chr5	102124712	102124959	+	0	NA	Intergenic	Intergenic	-54914	NM_172882	72145	Mm.332522	NM_172882	ENSMUSG00000043940	Wdfy3	2610509D04Rik|ALFY|AW319683|B930017C24|BWF1|Bchs|D5Ertd66e|Ggtb3|ZFYVE25|mKIAA0993	WD repeat and FYVE domain containing 3	protein-coding
DMR24	chr12	20312377	20312392	+	0	NA	Intergenic	CpG	503395	NR_015521	69513	Mm.273972	NR_015521		1700030C10Rik	-	RIKEN cDNA 1700030C10 gene	ncRNA
DMR41	chr2	37793366	37793427	+	0	NA	exon (NM_001163566, exon 10 of 13)	exon (NM_001163566, exon 10 of 13)	17147	NM_001163566	241324	Mm.392369	NM_001163566	ENSMUSG00000035403	Crb2	5930402A21|BC043114	crumbs homolog 2 (Drosophila)	protein-coding
DMR31	chr14	76109779	76110078	+	0	NA	promoter-TSS (NM_013745)	promoter-TSS (NM_013745)	887	NM_026177	67467	Mm.260767	NM_026177	ENSMUSG00000022008	Gpalpp1	1200011I18Rik|Kiaa1704	GPALPP motifs containing 1	protein-coding
DMR25	chr12	23800679	23800761	+	0	NA	Intergenic	CpG	296549	NM_001256489	66808	Mm.379124	NM_001256489		9030624G23Rik	-	RIKEN cDNA 9030624G23 gene	protein-coding
DMR42	chr2	90373310	90373472	+	0	NA	Intergenic	L1Md_T|LINE|L1	-27249	NM_146263	258330	Mm.330392	NM_146263		Olfr1274-ps	GA_x5J8B7W2BV0-3116-4045|MOR228-4|MOR228-5|Olfr1274	olfactory receptor 1274, pseudogene	protein-coding
DMR47	chr3	27471564	27472519	+	0	NA	intron (NM_173182, intron 11 of 25)	intron (NM_173182, intron 11 of 25)	100690	NM_177330	208188	Mm.194721	NM_177330	ENSMUSG00000051136	Ghsr	C530020I22Rik	growth hormone secretagogue receptor	protein-coding
DMR5	chr1	91611880	91612221	+	0	NA	Intergenic	Intergenic	70970	NM_023046	65247	Mm.234152	NM_023046	ENSMUSG00000026311	Asb1	1700029O08Rik|1700054C17Rik|AI426616|AI851378|mKIAA1146	ankyrin repeat and SOCS box-containing 1	protein-coding
DMR35	chr17	47501436	47501547	+	0	NA	intron (NM_022015, intron 1 of 8)	intron (NM_022015, intron 1 of 8)	796	NM_022015	63856	Mm.275901	NM_022015	ENSMUSG00000023980	Taf8	AW260255|Tbn	TAF8 RNA polymerase II, TATA box binding protein (TBP)-associated factorq	protein-coding
DMR46	chr2	168231513	168231534	+	0	NA	exon (NM_001160330, exon 1 of 1)	exon (NM_001160330, exon 1 of 1)	901	NM_001160330	69372	Mm.482182	NM_001160330	ENSMUSG00000074576	Mocs3	1700020H17Rik|Uba4	molybdenum cofactor synthesis 3	protein-coding
DMR29	chr12	110417247	110417521	+	0	NA	Intergenic	B4A|SINE|B4	-29795	NM_001135001	26931	Mm.240396	NM_012023	ENSMUSG00000017843	Ppp2r5c	2610043M05Rik|2700063L20Rik|AI060890|AW545884|C85228|D12Bwg0916e|mKIAA0044	protein phosphatase 2, regulatory subunit B', gamma	protein-coding
DMR56	chr5	135073134	135073854	+	0	NA	3' UTR (NM_177574, exon 2 of 2)	3' UTR (NM_177574, exon 2 of 2)	4772	NM_177574	194309	Mm.44356	NM_177574	ENSMUSG00000043614	Vps37d	Wbscr24	vacuolar protein sorting 37D (yeast)	protein-coding
DMR53	chr5	104475814	104476318	+	0	NA	intron (NM_008861, intron 2 of 14)	RLTR10-int|LTR|ERVK	16609	NM_008861	18764	Mm.6442	NM_008861	ENSMUSG00000034462	Pkd2	C030034P18Rik|PC2|TRPP2	polycystic kidney disease 2	protein-coding
DMR72	chrX	7076220	7076516	+	0	NA	exon (NM_001042542, exon 5 of 6)	exon (NM_001042542, exon 5 of 6)	8158	NM_001042542	11643	Mm.1498	NM_009651	ENSMUSG00000050089	Akap4	AKAP-4|AKAP82|Fsc1|PRKA4|mAKAP82|p82	A kinase (PRKA) anchor protein 4	protein-coding
DMR73	chrX	105152205	105152283	+	0	NA	Intergenic	CpG	13261	NR_002167	279610	Mm.418157	NR_002167		E530001F21Rik	-	RIKEN cDNA E530001F21 gene	pseudo
DMR30	chr14	21983244	21983542	+	0	NA	TTS (NM_145459)	TTS (NM_145459)	6208	NM_145459	218820	Mm.292401	NM_145459	ENSMUSG00000039081	Zfp503	AI181838|B830002A16Rik|Nolz-1|Nolz1|Znf503	zinc finger protein 503	protein-coding
DMR62	chr7	62464103	62464408	+	0	NA	exon (NM_013788, exon 1 of 1)	exon (NM_013788, exon 1 of 1)	255	NM_013788	27412	Mm.422745	NM_013788	ENSMUSG00000070526	Peg12	Frat3	paternally expressed 12	protein-coding
DMR69	chr8	121292481	121294509	+	0	NA	Intergenic	Intergenic	165810	NM_008024	14241	Mm.5111	NM_008024	ENSMUSG00000097084	Foxl1	FREAC7|Fkh6|fkh-6	forkhead box L1	protein-coding
DMR61	chr7	44839621	44840263	+	0	NA	TTS (NM_001042655)	TTS (NM_001042655)	3654	NM_010215	14204	Mm.2565	NM_010215	ENSMUSG00000074141	Il4i1	Fig1|Fig1-ps|LAAO|LAO	interleukin 4 induced 1	protein-coding
DMR63	chr7	107209931	107209984	+	0	NA	exon (NM_029660, exon 1 of 1)	exon (NM_029660, exon 1 of 1)	512	NM_029660	76572	Mm.128134	NM_029660	ENSMUSG00000073894	Rbmxl2	1700012H05Rik|Hnrnpg-t	RNA binding motif protein, X-linked-like 2	protein-coding
DMR16	chr11	118503644	118504264	+	0	NA	intron (NM_001039168, intron 6 of 14)	intron (NM_001039168, intron 6 of 14)	26994	NM_172573	217364	Mm.473963	NM_172573	ENSMUSG00000033857	Engase	C130099A03|D230014K01Rik	endo-beta-N-acetylglucosaminidase	protein-coding
DMR51	chr5	32153036	32154112	+	0	NA	3' UTR (NM_008037, exon 4 of 4)	3' UTR (NM_008037, exon 4 of 4)	17102	NM_008037	14284	Mm.24684	NM_008037	ENSMUSG00000029135	Fosl2	Fra-2	fos-like antigen 2	protein-coding
DMR44	chr2	154549463	154549653	+	0	NA	exon (NM_029305, exon 3 of 3)	exon (NM_029305, exon 3 of 3)	654	NM_029305	75480	Mm.440434	NM_029305	ENSMUSG00000038523	1700003F12Rik	-	RIKEN cDNA 1700003F12 gene	protein-coding
DMR13	chr11	98970698	98971296	+	0	NA	intron (NM_009024, intron 6 of 8)	intron (NM_009024, intron 6 of 8)	10526	NM_001176528	19401	Mm.439744	NM_009024	ENSMUSG00000037992	Rara	Nr1b1|RAR|RARalpha1	retinoic acid receptor, alpha	protein-coding
DMR22	chr12	19882453	19882551	+	0	NA	Intergenic	CpG	933277	NR_015521	69513	Mm.273972	NR_015521		1700030C10Rik	-	RIKEN cDNA 1700030C10 gene	ncRNA
DMR14	chr11	101878545	101879354	+	0	NA	intron (NM_010791, intron 2 of 2)	intron (NM_010791, intron 2 of 2)	15405	NM_010791	17285	Mm.3404	NM_010791	ENSMUSG00000001493	Meox1	AI385561|D330041M02Rik|Mox-1|Mox1	mesenchyme homeobox 1	protein-coding
DMR15	chr11	115173439	115174018	+	0	NA	intron (NM_012030, intron 1 of 5)	intron (NM_012030, intron 1 of 5)	10387	NM_012030	26941	Mm.27842	NM_012030	ENSMUSG00000020733	Slc9a3r1	EBP-50|NHE-RF|NHERF-1|NHERF1	solute carrier family 9 (sodium/hydrogen exchanger), member 3 regulator 1	protein-coding
DMR58	chr6	65026291	65026550	+	0	NA	Intergenic	B1_Mm|SINE|Alu	-16247	NM_007958	13990	Mm.99113	NM_007958	ENSMUSG00000029920	Smarcad1	AV081750|AW226546|D6Pas1|Etl1|mKIAA1122	SWI/SNF-related, matrix-associated actin-dependent regulator of chromatin, subfamily a, containing DEAD/H box 1	protein-coding
DMR68	chr8	84913443	84913591	+	0	NA	non-coding (NR_103491, exon 1 of 3)	non-coding (NR_103491, exon 1 of 3)	182	NR_103491	100503676	Mm.437155	NR_103491	ENSMUSG00000003812	LOC100503676	-	uncharacterized LOC100503676	ncRNA
DMR67	chr8	83583407	83583518	+	0	NA	intron (NM_027179, intron 1 of 11)	intron (NM_027179, intron 1 of 11)	11029	NM_027179	106529	Mm.352239	NM_027179	ENSMUSG00000031708	Tecr	2410016D23Rik|A230102P12Rik|AI173355|D17Ertd178e|Gpsn2|SC2	trans-2,3-enoyl-CoA reductase	protein-coding
DMR57	chr6	47744554	47744639	+	0	NA	promoter-TSS (NR_002841).5	promoter-TSS (NR_002841).5	-365	NR_002841	19799		NR_002841		Rn4.5s	-	4.5S RNA	rRNA
DMR45	chr2	163458681	163459442	+	0	NA	Intergenic	ERVL-E-int|LTR|ERVL	-13484	NR_028122	69517	Mm.395343	NR_028122	ENSMUSG00000053353	2310001K24Rik	-	RIKEN cDNA 2310001K24 gene	ncRNA
DMR19	chr12	18853771	18854304	+	0	NA	Intergenic	CpG	339527	NM_001201330	236366	Mm.352227	NM_001033157		5730507C01Rik	-	RIKEN cDNA 5730507C01 gene	protein-coding
DMR1	chr1	44480484	44480646	+	0	NA	Intergenic	L1Md_T|LINE|L1	-71106	NM_028450	70676	Mm.133132	NM_027506	ENSMUSG00000056870	Gulp1	3110030A04Rik|5730529O06Rik|CED-6|Ced6|GULP|Gulp-2	GULP, engulfment adaptor PTB domain containing 1	protein-coding
DMR8	chr11	32227838	32227976	+	0	NA	exon (NM_010822, exon 2 of 4)	exon (NM_010822, exon 2 of 4)	1402	NM_010822	268395	Mm.263161	NM_010822	ENSMUSG00000020287	Mpg	9830006D05|AI326268|APNG|Aag|Mid1	N-methylpurine-DNA glycosylase	protein-coding
DMR18	chr11	120225495	120226185	+	0	NA	Intergenic	Intergenic	-7107	NM_198423	268515	Mm.309498	NM_198423	ENSMUSG00000039741	Bahcc1	B930044J06|BC060615	BAH domain and coiled-coil containing 1	protein-coding
DMR36	chr17	48647496	48647828	+	0	NA	Intergenic	MT2A|LTR|ERVL	192761	NM_152823	76589	Mm.311629	NM_152823	ENSMUSG00000043592	Unc5cl	2510009H09Rik|BB155270|Zud	unc-5 homolog C (C. elegans)-like	protein-coding
DMR11	chr11	97138346	97139023	+	0	NA	exon (NM_198100, exon 8 of 9)	exon (NM_198100, exon 8 of 9)	7735	NR_106094	102466822		NR_106094		Mir7235	mmu-mir-7235	microRNA mir-7235	ncRNA
DMR54	chr5	124061854	124062867	+	0	NA	3' UTR (NM_019875, exon 12 of 12)	3' UTR (NM_019875, exon 12 of 12)	-30100	NM_177876	330192	Mm.4079	NM_177876	ENSMUSG00000066278	Vps37b	2300007F24Rik|AI415429|BC026744	vacuolar protein sorting 37B (yeast)	protein-coding
DMR48	chr3	138114114	138115239	+	0	NA	intron (NM_001163457, intron 9 of 19)	intron (NM_001163457, intron 9 of 19)	16701	NM_008642	17777	Mm.2941	NM_008642	ENSMUSG00000028158	Mttp	1810043K16Rik|MTP	microsomal triglyceride transfer protein	protein-coding
DMR6	chr1	135084989	135085355	+	0	NA	intron (NM_001033409, intron 1 of 17)	intron (NM_001033409, intron 1 of 17)	20104	NM_001033409	329252	Mm.279594	NM_001033409	ENSMUSG00000042793	Lgr6	A530037C04Rik|D830026M09	leucine-rich repeat-containing G protein-coupled receptor 6	protein-coding
DMR38	chr18	25487339	25487551	+	0	NA	intron (NM_001174074, intron 10 of 11)	CpG	266538	NM_133195	108013	Mm.266435	NM_133195	ENSMUSG00000024268	Celf4	A230070D14Rik|BRUNOL-4|Brul4|Brunol4|C130060B05Rik	CUGBP, Elav-like family member 4	protein-coding
DMR9	chr11	50604341	50604738	+	0	NA	intron (NM_175643, intron 2 of 21)	intron (NM_175643, intron 2 of 21)	2454	NM_175643	216725	Mm.110597	NM_175643	ENSMUSG00000036545	Adamts2	ADAM-TS2|ADAMTS-2|ADAMTS-3|PCINP|hPCPNI|mKIAA4060|pNPI	a disintegrin-like and metallopeptidase (reprolysin type) with thrombospondin type 1 motif, 2	protein-coding
DMR32	chr15	80111389	80112101	+	0	NA	intron (NM_207708, intron 3 of 3)	intron (NM_207708, intron 3 of 3)	20411	NM_207708	20972	Mm.230301	NM_009303	ENSMUSG00000022415	Syngr1	R75468|Syngr1b|p29	synaptogyrin 1	protein-coding
DMR50	chr4	147738538	147738766	+	0	NA	Intergenic	CpG	-36021	NM_001127188	100503584	Mm.276881	NM_001127188		Zfp534	Gm13159|OTTMUSG00000010681	zinc finger protein 534	protein-coding
DMR59	chr6	85483271	85484220	+	0	NA	intron (NM_001001160, intron 3 of 13)	intron (NM_001001160, intron 3 of 13)	19249	NM_001001160	330369	Mm.38777	NM_001001160	ENSMUSG00000047013	Fbxo41	9630017H13|D6Ertd538e	F-box protein 41	protein-coding
DMR60	chr7	26071868	26072006	+	0	NA	intron (NM_007813, intron 1 of 8)	intron (NM_007813, intron 1 of 8)	10442	NM_007813	13089	Mm.482696	NM_007813	ENSMUSG00000040583	Cyp2b13	-	cytochrome P450, family 2, subfamily b, polypeptide 13	protein-coding
DMR21	chr12	19288885	19288981	+	0	NA	Intergenic	CpG	774423	NM_001201330	236366	Mm.352227	NM_001033157		5730507C01Rik	-	RIKEN cDNA 5730507C01 gene	protein-coding
DMR65	chr8	22792960	22793097	+	0	NA	intron (NM_029505, intron 5 of 8)	intron (NM_029505, intron 5 of 8)	12626	NM_029505	64933	Mm.390023	NM_029505	ENSMUSG00000031539	Ap3m2	5830445E16Rik|AP-3B	adaptor-related protein complex 3, mu 2 subunit	protein-coding
DMR71	chr9	102771500	102771632	+	0	NA	Intergenic	Intergenic	31918	NR_033301	434510	Mm.387937	NM_001034892	ENSMUSG00000093812	Gm5627	EG434510	predicted gene 5627	ncRNA
DMR2	chr1	75388676	75388838	+	0	NA	exon (NM_007463, exon 4 of 41)	exon (NM_007463, exon 4 of 41)	3147	NM_001085370	11790	Mm.275397	NM_007463	ENSMUSG00000026207	Speg	AW125581|Apeg1|BPEG|D1Bwg1450e|SPEGalpha|SPEGbeta|mKIAA1297	SPEG complex locus	protein-coding
DMR39	chr19	37687694	37687986	+	0	NA	intron (NM_001105201, intron 3 of 5)	intron (NM_001105201, intron 3 of 5)	2160	NM_001105201	546726	Mm.457750	NM_001105201	ENSMUSG00000062432	Cyp26c1	EG546726	cytochrome P450, family 26, subfamily c, polypeptide 1	protein-coding
DMR7	chr1	187630684	187630795	+	0	NA	intron (NM_001243792, intron 1 of 7)	intron (NM_001243792, intron 1 of 7)	21733	NM_001243792	26381	Mm.89989	NM_011935	ENSMUSG00000026610	Esrrg	ERR3|Errg|NR3B3|mKIAA0832	estrogen-related receptor gamma	protein-coding
DMR64	chr8	14878002	14879008	+	0	NA	Intergenic	Intergenic	-10031	NM_012000	26889	Mm.254027	NM_012000	ENSMUSG00000026317	Cln8	mnd	ceroid-lipofuscinosis, neuronal 8	protein-coding
DMR70	chr9	45935931	45936154	+	0	NA	promoter-TSS (NM_011526)	promoter-TSS (NM_011526)	16	NM_011526	21345	Mm.283283	NM_011526	ENSMUSG00000032085	Tagln	Sm22|Sm22a|Ws310	transgelin	protein-coding
DMR27	chr12	23800911	23801026	+	0	NA	Intergenic	CpG	296301	NM_001256489	66808	Mm.379124	NM_001256489		9030624G23Rik	-	RIKEN cDNA 9030624G23 gene	protein-coding
DMR37	chr17	56294184	56294565	+	0	NA	exon (NM_029799, exon 3 of 3)	exon (NM_029799, exon 3 of 3)	-3863	NM_025836	66905	Mm.311696	NM_025836	ENSMUSG00000024197	Plin3	1300012C15Rik|M6prbp1|Tip47	perilipin 3	protein-coding
DMR49	chr4	145640699	145641078	+	0	NA	Intergenic	CpG	23742	NM_001205101	433801	Mm.276881	NM_001013808		Gm13212	OTTMUSG00000010965	predicted gene 13212	protein-coding
DMR17	chr11	120009435	120010142	+	0	NA	intron (NM_007377, intron 11 of 13)	intron (NM_007377, intron 11 of 13)	-4979	NR_037225	100526518		NR_037225		Mir3065	mmu-mir-3065	microRNA 3065	ncRNA
DMR55	chr5	125475043	125475198	+	0	NA	promoter-TSS (NM_030210)	promoter-TSS (NM_030210)	-753	NM_030210	78894	Mm.431573	NM_030210	ENSMUSG00000029482	Aacs	2210408B16Rik|SUR5	acetoacetyl-CoA synthetase	protein-coding
DMR4	chr1	75423120	75423362	+	0	NA	exon (NM_007463, exon 30 of 41)	exon (NM_007463, exon 30 of 41)	-12702	NM_133708	69080	Mm.23951	NM_133708	ENSMUSG00000033021	Gmppa	1810012N01Rik	GDP-mannose pyrophosphorylase A	protein-coding
DMR10	chr11	58998459	58999393	+	0	NA	intron (NM_001171512, intron 93 of 103)	intron (NM_001171512, intron 93 of 103)	20833	NM_053168	94091	Mm.248049	NM_053168	ENSMUSG00000020455	Trim11	-	tripartite motif-containing 11	protein-coding
DMR34	chr17	45545690	45545872	+	0	NA	exon (NM_001013749, exon 3 of 3)	exon (NM_001013749, exon 3 of 3)	3896	NM_001013749	210573	Mm.329064	NM_001013749	ENSMUSG00000096847	Tmem151b	Gm323	transmembrane protein 151B	protein-coding
DMR28	chr12	81991835	81992085	+	0	NA	exon (NM_018814, exon 32 of 36)	exon (NM_018814, exon 32 of 36)	131930	NM_018814	54604	Mm.86584	NM_018814	ENSMUSG00000021140	Pcnx	2900024E21Rik|3526401J03Rik|AF096286|AI327143|AI413187|Pcnxl1	pecanex homolog (Drosophila)	protein-coding
DMR17-1	chr12	56533735	565354600	+	0	NA	promoter-TSS (NM_009385)	promoter-TSS (NM_009385)	1800	NM_009385			NM_009385	ENSMUSG0000001496	Nkx2-1	T/EBP| Titf1| Ttf-1| Nkx2.1| AV026640		protein-coding
