# Supplementary material for: Polyglutamine-expanded ataxin3 alter specific gene expressions through changing DNA methylation status in SCA3/MJD
Source: Aging (Albany NY). 2020 Dec 19;13(3):3680–98. doi: 10.18632/aging.202331 (PMC7906150; doi:10.18632/aging.202331)
Supplement: Supplementary Table 8 [file aging-13-202331-s004.xlsx]

## Sheet: Supplementary Table 8
Chr	position	strand	site	average methylation percent	reads
chr1	3014928	+	CG	1	9
chr1	3014974	+	CG	0	8
chr1	3020814	+	CG	1	84
chr1	3020815	-	CG	1	5
chr1	3020842	+	CG	0.0116279	86
chr1	3020843	-	CG	1	5
chr1	3020877	+	CG	0.961538	676
chr1	3020891	+	CG	0.899705	678
chr1	3020892	-	CG	0.899872	779
chr1	3020945	+	CG	0.881579	152
chr1	3020946	-	CG	0.828205	780
chr1	3020971	+	CG	0.761364	176
chr1	3020972	-	CG	0.787072	789
chr1	3020987	+	CG	0.971591	176
chr1	3020988	-	CG	0.961977	789
chr1	3021013	-	CG	0.982211	787
chr1	3037802	+	CG	0.904523	398
chr1	3037820	+	CG	0.819549	399
chr1	3037821	-	CG	0.782787	244
chr1	3037825	+	CG	0.969925	399
chr1	3037826	-	CG	0.959016	244
chr1	3037827	+	CG	0.854637	399
chr1	3037828	-	CG	0.807377	244
chr1	3037845	+	CG	0.926952	397
chr1	3037846	-	CG	0.905738	244
chr1	3037854	-	CG	0.833333	6
chr1	3037856	-	CG	0.666667	6
chr1	3037863	-	CG	0.8125	48
chr1	3037869	+	CG	0.879699	399
chr1	3037870	-	CG	0.933798	287
chr1	3037911	-	CG	0.954064	283
chr1	3037915	-	CG	0.8	5
chr1	3037938	-	CG	1	5
chr1	3037941	-	CG	1	5
chr1	3037950	-	CG	0.8	5
chr1	3037995	-	CG	0.777778	9
chr1	3043661	+	CG	0.962264	53
chr1	3045088	+	CG	0.930233	43
chr1	3045119	+	CG	0.976744	43
chr1	3045120	-	CG	0.933333	45
chr1	3045299	+	CG	0.909091	44
chr1	3045300	-	CG	0.863636	44
chr1	3045306	+	CG	0.863636	44
chr1	3045307	-	CG	0.886364	44
chr1	3045313	-	CG	0.977273	44
chr1	3059400	+	CG	1	17
chr1	3059415	+	CG	0.705882	17
chr1	3059416	-	CG	0.705882	17
chr1	3059427	+	CG	0.941176	17
chr1	3059428	-	CG	0.882353	17
chr1	3059436	+	CG	0.705882	17
chr1	3059437	-	CG	0.705882	17
chr1	3059590	+	CG	1	17
chr1	3059591	-	CG	0.9375	16
chr1	3059635	-	CG	1	16
chr1	3087907	-	CG	0.54023	87
chr1	3093908	+	CG	0.967532	154
chr1	3094116	+	CG	0.745098	153
chr1	3094117	-	CG	0.5	16
chr1	3094122	-	CG	0.75	16
chr1	3099635	+	CG	0.952381	42
chr1	3099786	-	CG	0.935484	31
chr1	3106469	+	CG	1	8
chr1	3112234	+	CG	0.894009	217
chr1	3112266	+	CG	0.817352	219
chr1	3112267	-	CG	0.722513	191
chr1	3112371	+	CG	0.944954	218
chr1	3112372	-	CG	0.942708	192
chr1	3112403	-	CG	0.942105	190
chr1	3136724	+	CG	0.111111	9
chr1	3136770	+	CG	0.888889	9
chr1	3136816	+	CG	1	8
chr1	3144715	+	CG	0.769231	52
chr1	3149930	+	CG	0.987544	562
chr1	3149938	+	CG	0.962963	567
chr1	3149939	-	CG	0.948276	58
chr1	3150008	+	CG	1	5
chr1	3150022	+	CG	0.970228	571
chr1	3150023	-	CG	0.589286	56
chr1	3150047	+	CG	0.961404	570
chr1	3150048	-	CG	0.314815	54
chr1	3150058	-	CG	0.962963	54
chr1	3161132	-	CG	0.8	5
chr1	3180156	+	CG	0.987179	312
chr1	3188426	-	CG	0.923077	13
chr1	3301786	+	CG	0.981595	326
chr1	3301802	+	CG	0.98773	326
chr1	3301803	-	CG	0.991736	242
chr1	3301812	+	CG	0.978528	326
chr1	3301813	-	CG	0.987552	241
chr1	3301819	+	CG	0.990798	326
chr1	3301820	-	CG	0.96281	242
chr1	3301899	+	CG	0.947531	324
chr1	3301900	-	CG	0.966942	242
chr1	3301941	-	CG	0.920168	238
chr1	3308551	+	CG	0.963415	82
chr1	3308702	-	CG	0.945946	111
chr1	3344649	+	CG	0.946058	241
chr1	3344724	+	CG	0.937249	1243
chr1	3344725	-	CG	0.906805	676
chr1	3344742	+	CG	0.941375	1484
chr1	3344743	-	CG	0.933086	807
chr1	3344762	+	CG	0.956815	1482
chr1	3344763	-	CG	0.94382	801
chr1	3344777	+	CG	0.465659	728
chr1	3344778	-	CG	0.947302	797
chr1	3344788	+	CG	0.957507	353
chr1	3344789	-	CG	0.777778	9
chr1	3344808	+	CG	0.983051	354
chr1	3344809	-	CG	0.782609	23
chr1	3344824	+	CG	0.949153	354
chr1	3344825	-	CG	0.785714	28
chr1	3344845	+	CG	0.971751	354
chr1	3344846	-	CG	0.636364	22
chr1	3344849	+	CG	0.943662	355
chr1	3344850	-	CG	0.863636	22
chr1	3344863	+	CG	0.923077	13
chr1	3344864	-	CG	0.818182	22
chr1	3344871	+	CG	1	13
chr1	3344911	+	CG	1	13
chr1	3344912	-	CG	0.8	10
chr1	3344923	-	CG	0.9	10
chr1	3419903	+	CG	1	18
chr1	3419936	+	CG	0.842105	19
chr1	3419937	-	CG	0.538462	39
chr1	3420054	-	CG	1	39
chr1	3509745	+	CG	0.876404	89
chr1	3509850	+	CG	0.833333	6
chr1	3509851	-	CG	0.97561	82
chr1	3531651	+	CG	0.985714	210
chr1	3531658	+	CG	0.966667	210
chr1	3531659	-	CG	0.968944	322
chr1	3531671	+	CG	0.971698	212
chr1	3531672	-	CG	0.959752	323
chr1	3531676	+	CG	0.976415	212
chr1	3531677	-	CG	0.978328	323
chr1	3531680	+	CG	0.95283	212
chr1	3531681	-	CG	0.922601	323
chr1	3531686	+	CG	0.933962	212
chr1	3531687	-	CG	0.947205	322
chr1	3531690	+	CG	0.915094	212
chr1	3531691	-	CG	0.944272	323
chr1	3531692	+	CG	0.84434	212
chr1	3531693	-	CG	0.804954	323
chr1	3531694	+	CG	0.985849	212
chr1	3531695	-	CG	0.97205	322
chr1	3531760	+	CG	0.848341	211
chr1	3531761	-	CG	0.813084	321
chr1	3531764	+	CG	0.834123	211
chr1	3531765	-	CG	0.831776	321
chr1	3531770	+	CG	0.867925	212
chr1	3531771	-	CG	0.832298	322
chr1	3531778	+	CG	0.971564	211
chr1	3531779	-	CG	0.962733	322
chr1	3531785	-	CG	0.978056	319
chr1	3556763	+	CG	0.965517	58
chr1	3556775	+	CG	0.982759	58
chr1	3556776	-	CG	0.971429	35
chr1	3556782	+	CG	1	59
chr1	3556783	-	CG	1	35
chr1	3556786	+	CG	0.915254	59
chr1	3556787	-	CG	0.914286	35
chr1	3556966	+	CG	0.983333	60
chr1	3556967	-	CG	0.969697	33
chr1	3556986	+	CG	0.95	60
chr1	3556987	-	CG	1	33
chr1	3556998	-	CG	1	32
chr1	3614966	+	CG	0.888889	9
chr1	3615083	+	CG	0.666667	6
chr1	3615084	-	CG	0.75	16
chr1	3622136	+	CG	0.95339	472
chr1	3622216	+	CG	0.991561	474
chr1	3622217	-	CG	0.988636	616
chr1	3622256	+	CG	0.978477	604
chr1	3622257	-	CG	0.982114	615
chr1	3622310	+	CG	0.975207	605
chr1	3622311	-	CG	0.941101	781
chr1	3622340	+	CG	0.94898	98
chr1	3622341	-	CG	0.953846	780
chr1	3622504	+	CG	0.852632	95
chr1	3622505	-	CG	0.927083	96
chr1	3622513	+	CG	0.95122	82
chr1	3622514	-	CG	0.989583	96
chr1	3622545	-	CG	0.979167	96
chr1	3670645	+	CG	0.0478548	606
chr1	3670655	+	CG	0.00822368	608
chr1	3670656	-	CG	0	516
chr1	3670670	+	CG	0.00656814	609
chr1	3670671	-	CG	0.00968992	516
chr1	3670682	+	CG	0.00834725	599
chr1	3670683	-	CG	0.0116054	517
chr1	3670685	+	CG	0.00494234	607
chr1	3670686	-	CG	0.00580271	517
chr1	3670703	+	CG	0	8
chr1	3670722	+	CG	0.00656814	609
chr1	3670723	-	CG	0.00582524	515
chr1	3670725	+	CG	0.00490998	611
chr1	3670726	-	CG	0	516
chr1	3670735	+	CG	0.00163666	611
chr1	3670736	-	CG	0.00194175	515
chr1	3670742	+	CG	0	611
chr1	3670743	-	CG	0.00779727	513
chr1	3670752	-	CG	0.0410156	512
chr1	3671095	+	CG	0.0633147	537
chr1	3671099	+	CG	0.00742115	539
chr1	3671100	-	CG	0.00907716	661
chr1	3671102	+	CG	0	539
chr1	3671103	-	CG	0	660
chr1	3671105	+	CG	0.00556586	539
chr1	3671106	-	CG	0	660
chr1	3671109	+	CG	0.00185529	539
chr1	3671110	-	CG	0.0030349	659
chr1	3671114	+	CG	0.00556586	539
chr1	3671115	-	CG	0.00151286	661
chr1	3671118	+	CG	0.0037037	540
chr1	3671119	-	CG	0.0136157	661
chr1	3671124	+	CG	0.00369686	541
chr1	3671125	-	CG	0.00151057	662
chr1	3671127	+	CG	0.00369686	541
chr1	3671128	-	CG	0.0060423	662
chr1	3671132	+	CG	0.00554529	541
chr1	3671133	-	CG	0.00907716	661
chr1	3671135	+	CG	0.00554529	541
chr1	3671136	-	CG	0.00311526	642
chr1	3671142	+	CG	0.00369686	541
chr1	3671143	-	CG	0.01059	661
chr1	3671144	+	CG	0.00369686	541
chr1	3671145	-	CG	0.00608828	657
chr1	3671161	+	CG	0.00924214	541
chr1	3671162	-	CG	0.0030303	660
chr1	3671163	+	CG	0.00184843	541
chr1	3671164	-	CG	0.00606061	660
chr1	3671174	+	CG	0.00554529	541
chr1	3671175	-	CG	0.00152905	654
chr1	3671177	+	CG	0.00739372	541
chr1	3671178	-	CG	0.0030303	660
chr1	3671182	-	CG	0.0735069	653
chr1	3671222	+	CG	0	48
chr1	3671229	+	CG	0	48
chr1	3671230	-	CG	0.00649351	154
chr1	3671232	+	CG	0	48
chr1	3671233	-	CG	0	154
chr1	3671265	+	CG	0	48
chr1	3671266	-	CG	0	155
chr1	3671413	+	CG	0	48
chr1	3671414	-	CG	0	153
chr1	3671424	+	CG	0	47
chr1	3671425	-	CG	0.00641026	156
chr1	3671429	+	CG	0	47
chr1	3671430	-	CG	0.00649351	154
chr1	3671447	+	CG	0.0510806	509
chr1	3671448	-	CG	0.00653595	153
chr1	3671451	+	CG	0.00782779	511
chr1	3671452	-	CG	0.00277393	721
chr1	3671453	+	CG	0	510
chr1	3671454	-	CG	0.00277393	721
chr1	3671456	+	CG	0.00587084	511
chr1	3671457	-	CG	0	721
chr1	3671478	+	CG	0.00391389	511
chr1	3671479	-	CG	0.0126227	713
chr1	3671482	+	CG	0.00779727	513
chr1	3671483	-	CG	0.00278552	718
chr1	3671486	+	CG	0.00194932	513
chr1	3671487	-	CG	0.00841515	713
chr1	3671490	+	CG	0.00584795	513
chr1	3671491	-	CG	0.00840336	714
chr1	3671493	+	CG	0.0136452	513
chr1	3671494	-	CG	0.00418994	716
chr1	3671496	+	CG	0.00974659	513
chr1	3671497	-	CG	0.00834492	719
chr1	3671500	+	CG	0.00584795	513
chr1	3671501	-	CG	0.00138122	724
chr1	3671502	+	CG	0.00974659	513
chr1	3671503	-	CG	0.0165975	723
chr1	3671512	+	CG	0.00390625	512
chr1	3671513	-	CG	0.00414365	724
chr1	3671521	+	CG	0.0616667	600
chr1	3671522	-	CG	0.0746888	723
chr1	3671529	+	CG	0.00664452	602
chr1	3671530	-	CG	0.00341297	586
chr1	3671533	+	CG	0.0066335	603
chr1	3671534	-	CG	0	586
chr1	3671537	+	CG	0.00165289	605
chr1	3671538	-	CG	0.00341297	586
chr1	3671544	+	CG	0.00330579	605
chr1	3671545	-	CG	0.00341297	586
chr1	3671552	+	CG	0.0133111	601
chr1	3671553	-	CG	0	584
chr1	3671555	+	CG	0.00991736	605
chr1	3671556	-	CG	0.00686106	583
chr1	3671569	+	CG	0.00661157	605
chr1	3671570	-	CG	0.00511073	587
chr1	3671572	+	CG	0.00826446	605
chr1	3671573	-	CG	0.00511073	587
chr1	3671586	+	CG	0.00498339	602
chr1	3671587	-	CG	0.00171233	584
chr1	3671588	+	CG	0.0116279	602
chr1	3671589	-	CG	0.00859107	582
chr1	3671592	-	CG	0.0804795	584
chr1	3671636	+	CG	0.0434783	23
chr1	3671637	-	CG	0	6
chr1	3671642	+	CG	0	23
chr1	3671643	-	CG	0.0112994	177
chr1	3671644	+	CG	0	23
chr1	3671645	-	CG	0.00564972	177
chr1	3671655	+	CG	0	23
chr1	3671656	-	CG	0.00564972	177
chr1	3671660	+	CG	0.0434783	23
chr1	3671661	-	CG	0.0112994	177
chr1	3671663	+	CG	0	23
chr1	3671664	-	CG	0	177
chr1	3671666	+	CG	0	23
chr1	3671667	-	CG	0	177
chr1	3671669	+	CG	0	23
chr1	3671670	-	CG	0	177
chr1	3671821	+	CG	0	23
chr1	3671822	-	CG	0	175
chr1	3671824	+	CG	0	23
chr1	3671825	-	CG	0.0171429	175
chr1	3671836	-	CG	0.0290698	172
chr1	3671893	+	CG	0	6
chr1	3673266	+	CG	0.9375	16
chr1	3673316	+	CG	1	18
chr1	3673320	+	CG	0.111111	18
chr1	3691491	+	CG	0.911392	158
chr1	3691616	+	CG	0.7875	160
chr1	3691617	-	CG	0.8	370
chr1	3691644	-	CG	0.923288	365
chr1	3733331	-	CG	0.7	20
chr1	3734928	+	CG	0.8	85
chr1	3734953	+	CG	0.988372	86
chr1	3734954	-	CG	0.987013	77
chr1	3734955	+	CG	0.988372	86
chr1	3734956	-	CG	0.961039	77
chr1	3735137	-	CG	0.986667	75
chr1	3740675	+	CG	0.96875	64
chr1	3740826	-	CG	0.95	260
chr1	3746770	+	CG	0.928047	681
chr1	3746874	-	CG	0.994949	198
chr1	3766236	+	CG	0.894737	19
chr1	3766282	+	CG	0.99	100
chr1	3766433	-	CG	0.960976	205
chr1	3772073	+	CG	1	14
chr1	3772096	+	CG	1	14
chr1	3772097	-	CG	0.827586	29
chr1	3772101	+	CG	0.357143	14
chr1	3772102	-	CG	0	29
chr1	3772105	+	CG	0.928571	14
chr1	3772106	-	CG	1	29
chr1	3772137	-	CG	1	29
chr1	3803659	+	CG	1	9
chr1	3803694	+	CG	1	9
chr1	3803770	+	CG	1	9
chr1	3803774	+	CG	1	9
chr1	3803783	+	CG	1	9
chr1	3805582	+	CG	1	65
chr1	3805733	-	CG	0.942857	35
chr1	3811902	+	CG	1	94
chr1	3811939	+	CG	0.723404	94
chr1	3811940	-	CG	0.796296	54
chr1	3812114	-	CG	0.927273	55
chr1	3824295	+	CG	0.976378	127
chr1	3824446	-	CG	1	8
chr1	3831146	+	CG	0.951807	83
chr1	3831150	+	CG	0.951807	83
chr1	3831151	-	CG	0.961538	26
chr1	3831332	-	CG	0.923077	26
chr1	3847102	+	CG	0.956522	92
chr1	3847253	-	CG	0.97	100
chr1	3852402	+	CG	0.917241	290
chr1	3852417	+	CG	0.89726	292
chr1	3852418	-	CG	0.899543	219
chr1	3852541	+	CG	0.976027	292
chr1	3852542	-	CG	0.96789	218
chr1	3852544	+	CG	0.972603	292
chr1	3852545	-	CG	0.981651	218
chr1	3852567	-	CG	0.967742	217
chr1	3852606	+	CG	0.928125	320
chr1	3852630	+	CG	0.796875	320
chr1	3852631	-	CG	0.816406	256
chr1	3852753	+	CG	0.963526	329
chr1	3852754	-	CG	0.972549	255
chr1	3852779	-	CG	0.980392	255
chr1	3852818	+	CG	0.989339	469
chr1	3852819	-	CG	0	8
chr1	3852948	-	CG	0.755	200
chr1	3853068	-	CG	0.875	8
chr1	3853087	-	CG	0	8
chr1	3858676	+	CG	0.615385	13
chr1	3878095	+	CG	0.935374	294
chr1	3878228	-	CG	0.90678	354
chr1	3892177	+	CG	0.879433	564
chr1	3892197	+	CG	0.620209	574
chr1	3892198	-	CG	0.594203	345
chr1	3892311	-	CG	0.845029	342
chr1	3896433	+	CG	0.969231	65
chr1	3896584	-	CG	0.988889	90
chr1	3905016	+	CG	0.888889	9
chr1	3905033	+	CG	0.777778	9
chr1	3905034	-	CG	0.875	8
chr1	3905083	+	CG	0.875	8
chr1	3905084	-	CG	0.857143	7
chr1	3921889	+	CG	1	9
chr1	3921890	-	CG	1	5
chr1	3934417	+	CG	0.948298	793
chr1	3934477	+	CG	0.88539	794
chr1	3934478	-	CG	0.866667	15
chr1	3934514	+	CG	0.948363	794
chr1	3934515	-	CG	0.933333	15
chr1	3934521	-	CG	1	15
chr1	3965737	+	CG	0.596215	317
chr1	3965842	-	CG	0.978474	511
chr1	3977485	+	CG	0.866667	60
chr1	3977521	+	CG	0.866667	60
chr1	3977522	-	CG	0.928571	14
chr1	3977723	-	CG	0.923077	13
chr1	3986237	+	CG	1	7
chr1	3986273	+	CG	0.857143	7
chr1	3987442	-	CG	1	6
chr1	3987470	-	CG	0.666667	6
chr1	3987506	-	CG	1	5
chr1	3987877	+	CG	0.978448	232
chr1	3987919	+	CG	0.905172	232
chr1	3987920	-	CG	0.906667	225
chr1	3987926	+	CG	0.918103	232
chr1	3987927	-	CG	0.964444	225
chr1	3987943	+	CG	0.982684	231
chr1	3987944	-	CG	0.897778	225
chr1	3987945	+	CG	0.965368	231
chr1	3987946	-	CG	0.924444	225
chr1	3987953	-	CG	0.950673	223
chr1	4004784	+	CG	0.97561	82
chr1	4004990	-	CG	0.829268	82
chr1	4022241	+	CG	0.951456	103
chr1	4022392	-	CG	0.915493	142
chr1	4059218	+	CG	0.960526	76
chr1	4059264	+	CG	0.842105	76
chr1	4059265	-	CG	0.926829	82
chr1	4059433	-	CG	0.691358	81
chr1	4079516	+	CG	1	11
chr1	4085259	+	CG	0.916667	12
chr1	4085283	+	CG	0.923077	13
chr1	4085284	-	CG	0.905941	202
chr1	4085300	+	CG	0.846154	13
chr1	4085301	-	CG	0.940299	201
chr1	4085381	-	CG	1	12
chr1	4085415	+	CG	0.888889	27
chr1	4085416	-	CG	1	11
chr1	4085422	+	CG	0.888889	27
chr1	4085423	-	CG	0.90625	32
chr1	4085429	+	CG	0.925926	27
chr1	4085430	-	CG	0.84375	32
chr1	4085434	+	CG	0.962963	27
chr1	4085435	-	CG	0.9375	32
chr1	4085438	+	CG	1	27
chr1	4085439	-	CG	0.9375	32
chr1	4085468	-	CG	0.903226	31
chr1	4085588	+	CG	0.909091	11
chr1	4085589	-	CG	0.936508	189
chr1	4085623	+	CG	1	7
chr1	4085624	-	CG	0.930851	188
chr1	4085630	+	CG	0.852941	34
chr1	4085631	-	CG	1	10
chr1	4085637	+	CG	0.941176	34
chr1	4085638	-	CG	0.9	10
chr1	4085642	+	CG	0.941176	34
chr1	4085643	-	CG	1	10
chr1	4085646	+	CG	1	34
chr1	4085647	-	CG	0.9	10
chr1	4085676	-	CG	1	10
chr1	4103065	+	CG	0.888889	9
chr1	4103089	+	CG	0.777778	9
chr1	4106410	+	CG	0.925764	458
chr1	4106516	-	CG	0.791946	447
chr1	4161630	+	CG	0.944444	126
chr1	4161807	-	CG	0.917526	97
chr1	4187674	+	CG	0.969325	163
chr1	4187683	+	CG	0.920245	163
chr1	4187684	-	CG	0.885167	209
chr1	4187706	+	CG	0.98773	163
chr1	4187707	-	CG	0.957346	211
chr1	4187712	+	CG	0.98773	163
chr1	4187713	-	CG	0.981043	211
chr1	4187801	+	CG	0.969325	163
chr1	4187802	-	CG	0.938095	210
chr1	4187803	+	CG	0.846626	163
chr1	4187804	-	CG	0.890476	210
chr1	4187820	+	CG	0.975309	162
chr1	4187821	-	CG	0.961905	210
chr1	4187845	-	CG	0.889423	208
chr1	4187889	+	CG	0.964989	457
chr1	4187911	+	CG	0.910675	459
chr1	4187912	-	CG	0.891008	734
chr1	4187922	+	CG	0.938998	459
chr1	4187923	-	CG	0.900545	734
chr1	4187998	-	CG	0.938356	730
chr1	4193621	-	CG	0.918919	37
chr1	4193667	-	CG	0.2	5
chr1	4193859	-	CG	0.8	5
chr1	4212930	+	CG	0.952381	168
chr1	4213081	-	CG	0.875	8
chr1	4219858	-	CG	0.00806452	124
chr1	4219920	-	CG	0.758065	124
chr1	4235785	-	CG	1	20
chr1	4235866	-	CG	0	20
chr1	4247982	+	CG	0.971014	207
chr1	4248093	+	CG	0.913462	208
chr1	4248094	-	CG	0.95	120
chr1	4248133	-	CG	0.925	120
chr1	4255120	+	CG	0.466667	15
chr1	4259068	+	CG	0.888889	9
chr1	4259110	+	CG	0.777778	9
chr1	4259111	-	CG	0.5	6
chr1	4259339	-	CG	0.666667	6
chr1	4260279	+	CG	0.855263	76
chr1	4260490	-	CG	0.622517	151
chr1	4277819	+	CG	1	8
chr1	4280077	-	CG	0	14
chr1	4280140	-	CG	0	14
chr1	4305956	+	CG	0.96875	96
chr1	4306106	-	CG	0.921986	141
chr1	4341097	-	CG	0.955556	135
chr1	4376368	-	CG	0.826087	23
chr1	4376595	-	CG	1	26
chr1	4440438	+	CG	0.959839	249
chr1	4440586	+	CG	0.738956	249
chr1	4440587	-	CG	0.742489	233
chr1	4440611	+	CG	0.852	250
chr1	4440612	-	CG	0.840517	232
chr1	4440616	-	CG	0.798283	233
chr1	4486603	+	CG	0.95098	102
chr1	4486754	-	CG	0.96124	129
chr1	4491970	+	CG	0.0273973	219
chr1	4491976	+	CG	0.00913242	219
chr1	4491977	-	CG	0.00478469	209
chr1	4491980	+	CG	0.0136364	220
chr1	4491981	-	CG	0.00956938	209
chr1	4491998	+	CG	0.00913242	219
chr1	4491999	-	CG	0.014218	211
chr1	4492004	+	CG	0.00917431	218
chr1	4492005	-	CG	0.00947867	211
chr1	4492007	+	CG	0.00913242	219
chr1	4492008	-	CG	0.00943396	212
chr1	4492010	+	CG	0.00469484	213
chr1	4492011	-	CG	0.00938967	213
chr1	4492085	+	CG	0.00900901	222
chr1	4492086	-	CG	0.00469484	213
chr1	4492087	+	CG	0.018018	222
chr1	4492088	-	CG	0.00469484	213
chr1	4492090	+	CG	0.027027	222
chr1	4492091	-	CG	0.00938967	213
chr1	4492108	+	CG	0.00904977	221
chr1	4492109	-	CG	0.00471698	212
chr1	4492118	+	CG	0.00456621	219
chr1	4492119	-	CG	0	211
chr1	4492131	-	CG	0.0571429	210
chr1	4492154	+	CG	0.0640097	828
chr1	4492164	+	CG	0.00723764	829
chr1	4492165	-	CG	0.00647948	463
chr1	4492177	+	CG	0.00845411	828
chr1	4492178	-	CG	0.00862069	464
chr1	4492181	+	CG	0.0159705	814
chr1	4492182	-	CG	0.00431034	464
chr1	4492189	+	CG	0.00963855	830
chr1	4492190	-	CG	0.0258621	464
chr1	4492205	+	CG	0.0108434	830
chr1	4492206	-	CG	0.00862069	464
chr1	4492216	+	CG	0.013269	829
chr1	4492217	-	CG	0.0258621	464
chr1	4492232	-	CG	0.114719	462
chr1	4492310	+	CG	0.095624	617
chr1	4492330	+	CG	0.00485437	618
chr1	4492331	-	CG	0.0075	400
chr1	4492333	+	CG	0.00161812	618
chr1	4492334	-	CG	0.005	400
chr1	4492337	+	CG	0.00978793	613
chr1	4492338	-	CG	0	401
chr1	4492339	+	CG	0.00162602	615
chr1	4492340	-	CG	0	401
chr1	4492345	+	CG	0.00494234	607
chr1	4492346	-	CG	0.0075	400
chr1	4492365	+	CG	0.0113269	618
chr1	4492366	-	CG	0.00498753	401
chr1	4492385	+	CG	0.0113269	618
chr1	4492386	-	CG	0.0175439	399
chr1	4492397	+	CG	0.0194175	618
chr1	4492398	-	CG	0.0250627	399
chr1	4492405	+	CG	0.142857	7
chr1	4492406	-	CG	0.0757576	396
chr1	4492424	+	CG	0.0854701	702
chr1	4492425	-	CG	0	10
chr1	4492456	+	CG	0.00988701	708
chr1	4492457	-	CG	0.00930233	645
chr1	4492458	+	CG	0.00991501	706
chr1	4492459	-	CG	0.020155	645
chr1	4492462	+	CG	0.0141243	708
chr1	4492463	-	CG	0.0111111	630
chr1	4492468	+	CG	0.00141243	708
chr1	4492469	-	CG	0.0108527	645
chr1	4492478	+	CG	0.00990099	707
chr1	4492479	-	CG	0.00465116	645
chr1	4492480	+	CG	0.00565771	707
chr1	4492481	-	CG	0.00778816	642
chr1	4492483	+	CG	0.0672854	431
chr1	4492484	-	CG	0.0669782	642
chr1	4492495	+	CG	0.00224719	445
chr1	4492496	-	CG	0.00551471	544
chr1	4492498	+	CG	0.00898876	445
chr1	4492499	-	CG	0.00183824	544
chr1	4492504	+	CG	0.00902935	443
chr1	4492505	-	CG	0.0128676	544
chr1	4492527	+	CG	0.0134831	445
chr1	4492528	-	CG	0.0130112	538
chr1	4492536	+	CG	0.00449438	445
chr1	4492537	-	CG	0.00919118	544
chr1	4492551	+	CG	0.0045045	444
chr1	4492552	-	CG	0.00183824	544
chr1	4492554	+	CG	0.00902935	443
chr1	4492555	-	CG	0.0092081	543
chr1	4492557	+	CG	0.013544	443
chr1	4492558	-	CG	0.00550459	545
chr1	4492559	+	CG	0.0158014	443
chr1	4492560	-	CG	0	545
chr1	4492563	+	CG	0.0307692	260
chr1	4492564	-	CG	0.0537037	540
chr1	4492600	+	CG	0.00766284	261
chr1	4492601	-	CG	0.00840336	119
chr1	4492602	+	CG	0.0267176	262
chr1	4492603	-	CG	0.0168067	119
chr1	4492608	+	CG	0	262
chr1	4492609	-	CG	0.0252101	119
chr1	4492690	+	CG	0.019084	262
chr1	4492691	-	CG	0.0169492	118
chr1	4492692	+	CG	0.0229008	262
chr1	4492693	-	CG	0.00833333	120
chr1	4492704	+	CG	0.00763359	262
chr1	4492705	-	CG	0.00833333	120
chr1	4492715	+	CG	0.0983051	590
chr1	4492716	-	CG	0.075	120
chr1	4492754	+	CG	0.00341297	586
chr1	4492755	-	CG	0.0173333	750
chr1	4492772	-	CG	0.0844504	746
chr1	4493069	+	CG	0.0566038	212
chr1	4493092	+	CG	0.00934579	214
chr1	4493093	-	CG	0.00906344	331
chr1	4493121	+	CG	0	5
chr1	4493159	+	CG	0	214
chr1	4493160	-	CG	0.00903614	332
chr1	4493163	+	CG	0.0233645	214
chr1	4493164	-	CG	0.0150602	332
chr1	4493187	+	CG	0	214
chr1	4493188	-	CG	0.00906344	331
chr1	4493194	+	CG	0.0280374	214
chr1	4493195	-	CG	0.0271903	331
chr1	4493198	+	CG	0.0233645	214
chr1	4493199	-	CG	0.0242424	330
chr1	4493202	-	CG	0.0424242	330
chr1	4493238	+	CG	0.043956	182
chr1	4493245	+	CG	0.00546448	183
chr1	4493246	-	CG	0.0137931	580
chr1	4493250	+	CG	0.00546448	183
chr1	4493251	-	CG	0.010327	581
chr1	4493257	+	CG	0.0218579	183
chr1	4493258	-	CG	0.00516351	581
chr1	4493268	+	CG	0.00543478	184
chr1	4493269	-	CG	0.00859107	582
chr1	4493341	+	CG	0.0108108	185
chr1	4493342	-	CG	0.00687285	582
chr1	4493343	+	CG	0	185
chr1	4493344	-	CG	0.00687285	582
chr1	4493350	+	CG	0.027027	185
chr1	4493351	-	CG	0.0189329	581
chr1	4493352	+	CG	0.0108108	185
chr1	4493353	-	CG	0.0103093	582
chr1	4493358	-	CG	0.0794473	579
chr1	4493395	+	CG	0.0135135	74
chr1	4493419	+	CG	0	74
chr1	4493420	-	CG	0.00980392	102
chr1	4493425	+	CG	0	75
chr1	4493426	-	CG	0.0196078	102
chr1	4493576	+	CG	0	75
chr1	4493577	-	CG	0.029703	101
chr1	4493578	+	CG	0	75
chr1	4493579	-	CG	0.00990099	101
chr1	4493604	+	CG	0	74
chr1	4493605	-	CG	0.039604	101
chr1	4493616	+	CG	0.114558	419
chr1	4493617	-	CG	0.05	100
chr1	4493621	+	CG	0.00712589	421
chr1	4493622	-	CG	0.0119454	586
chr1	4493623	+	CG	0.0118765	421
chr1	4493624	-	CG	0.00682594	586
chr1	4493644	+	CG	0	421
chr1	4493645	-	CG	0.0017094	585
chr1	4493646	+	CG	0	405
chr1	4493647	-	CG	0.0102389	586
chr1	4493656	+	CG	0.00879765	341
chr1	4493657	-	CG	0.0153846	585
chr1	4493661	+	CG	0.0210084	238
chr1	4493662	-	CG	0.0136519	586
chr1	4493667	+	CG	0.0118765	421
chr1	4493668	-	CG	0.0238908	586
chr1	4493672	+	CG	0.1	140
chr1	4493673	-	CG	0.0480274	583
chr1	4493694	+	CG	0.0285714	140
chr1	4493695	-	CG	0.00634921	630
chr1	4493710	+	CG	0	140
chr1	4493711	-	CG	0	630
chr1	4493730	+	CG	0.0285714	140
chr1	4493731	-	CG	0.00974026	616
chr1	4493749	-	CG	0.112903	620
chr1	4496988	+	CG	0.0711382	492
chr1	4496991	+	CG	0.0263158	494
chr1	4496992	-	CG	0.0218182	550
chr1	4497028	+	CG	0.0181818	495
chr1	4497029	-	CG	0.0254083	551
chr1	4497040	+	CG	0.020202	495
chr1	4497041	-	CG	0.0108893	551
chr1	4497069	+	CG	0.0262626	495
chr1	4497070	-	CG	0.0127042	551
chr1	4497073	+	CG	0.0101215	494
chr1	4497074	-	CG	0.0326679	551
chr1	4497076	+	CG	0.0222222	495
chr1	4497077	-	CG	0.00907441	551
chr1	4497083	+	CG	0.0776978	695
chr1	4497084	-	CG	0.0673953	549
chr1	4497090	+	CG	0.0241821	703
chr1	4497091	-	CG	0.0227001	837
chr1	4497111	+	CG	0.0284495	703
chr1	4497112	-	CG	0.0214797	838
chr1	4497118	+	CG	0.0214286	700
chr1	4497119	-	CG	0.0238663	838
chr1	4497123	+	CG	0.0143266	698
chr1	4497124	-	CG	0.022673	838
chr1	4497127	+	CG	0.0184922	703
chr1	4497128	-	CG	0.0107399	838
chr1	4497145	+	CG	0.0743802	121
chr1	4497146	-	CG	0.0925481	832
chr1	4497159	+	CG	0.0330579	121
chr1	4497160	-	CG	0.0169492	118
chr1	4497187	+	CG	0.00826446	121
chr1	4497188	-	CG	0.00840336	119
chr1	4497189	+	CG	0.0186916	107
chr1	4497190	-	CG	0.0168067	119
chr1	4497225	-	CG	0	7
chr1	4497244	+	CG	0	121
chr1	4497245	-	CG	0.0347826	115
chr1	4497288	-	CG	0.100917	109
chr1	4523484	+	CG	0.963636	440
chr1	4523573	-	CG	0.923885	762
chr1	4529612	-	CG	0.978261	92
chr1	4553704	+	CG	0.944	750
chr1	4553746	+	CG	0.966711	751
chr1	4553747	-	CG	0.982405	682
chr1	4553752	+	CG	0.972037	751
chr1	4553753	-	CG	0.966276	682
chr1	4553779	-	CG	0.936765	680
chr1	4559683	-	CG	0.333333	6
chr1	4559686	+	CG	0.973494	415
chr1	4559687	-	CG	0	6
chr1	4559698	+	CG	0.860241	415
chr1	4559699	-	CG	0.857143	14
chr1	4559719	+	CG	0.80241	415
chr1	4559720	-	CG	0.916667	12
chr1	4559723	+	CG	0.942169	415
chr1	4559724	-	CG	0.916667	12
chr1	4559736	+	CG	0.973761	686
chr1	4559746	+	CG	0.947826	690
chr1	4559747	-	CG	0.959248	319
chr1	4559784	-	CG	0.902821	319
chr1	4559814	+	CG	0.789474	19
chr1	4559815	-	CG	0.952	125
chr1	4559828	+	CG	0.85	20
chr1	4559829	-	CG	0.656	125
chr1	4559854	-	CG	0.943089	123
chr1	4559898	+	CG	0.9	10
chr1	4559910	+	CG	1	10
chr1	4559911	-	CG	0.933333	15
chr1	4559931	+	CG	0.666667	9
chr1	4559932	-	CG	0.866667	15
chr1	4559935	+	CG	1	9
chr1	4559936	-	CG	0.866667	15
chr1	4559948	+	CG	0.934783	46
chr1	4559949	-	CG	1	9
chr1	4559955	+	CG	0.847826	46
chr1	4559956	-	CG	0.857143	7
chr1	4559958	+	CG	0.891304	46
chr1	4559959	-	CG	0.857143	7
chr1	4559996	-	CG	1	7
chr1	4560065	+	CG	0.545455	11
chr1	4560066	-	CG	0.887755	196
chr1	4560076	-	CG	0.2	10
chr1	4560087	-	CG	1	9
chr1	4560122	+	CG	0.8	5
chr1	4560143	+	CG	0.6	5
chr1	4560147	+	CG	1	5
chr1	4560160	+	CG	0.969582	263
chr1	4560170	+	CG	0.939163	263
chr1	4560171	-	CG	0.97006	334
chr1	4560208	-	CG	0.919403	335
chr1	4560238	+	CG	0.938462	65
chr1	4560239	-	CG	0.95122	287
chr1	4560252	+	CG	0.671642	67
chr1	4560253	-	CG	0.646853	286
chr1	4560278	-	CG	0.989547	287
chr1	4560322	+	CG	0.97561	41
chr1	4560334	+	CG	0.878049	41
chr1	4560335	-	CG	0.8	5
chr1	4560355	+	CG	0.853659	41
chr1	4560359	+	CG	0.95122	41
chr1	4560372	+	CG	0.992908	141
chr1	4560379	+	CG	0.87234	141
chr1	4560382	+	CG	0.964539	141
chr1	4560490	-	CG	0.951613	62
chr1	4560534	+	CG	1	11
chr1	4560546	+	CG	0.909091	11
chr1	4560547	-	CG	0.833333	6
chr1	4560567	+	CG	0.909091	11
chr1	4560568	-	CG	0.666667	6
chr1	4560571	+	CG	1	11
chr1	4560572	-	CG	1	6
chr1	4560584	+	CG	0.976879	173
chr1	4560585	-	CG	1	5
chr1	4560591	+	CG	0.890173	173
chr1	4560592	-	CG	0.862069	29
chr1	4560594	+	CG	0.942197	173
chr1	4560595	-	CG	0.931034	29
chr1	4560632	-	CG	0.862069	29
chr1	4560676	+	CG	0.803191	188
chr1	4560694	+	CG	0.0531915	188
chr1	4560796	+	CG	1	7
chr1	4560803	+	CG	1	7
chr1	4560806	+	CG	0.857143	7
chr1	4560888	+	CG	0.705882	187
chr1	4560889	-	CG	0.7	30
chr1	4560914	-	CG	0.933333	30
chr1	4560958	+	CG	0.966667	90
chr1	4560970	+	CG	0.869565	92
chr1	4560991	+	CG	0.913043	92
chr1	4560995	+	CG	0.956522	92
chr1	4571618	+	CG	0.0330882	272
chr1	4571642	+	CG	0.00727273	275
chr1	4571643	-	CG	0	130
chr1	4571647	+	CG	0.00729927	274
chr1	4571648	-	CG	0	130
chr1	4571655	+	CG	0.00364964	274
chr1	4571656	-	CG	0	130
chr1	4571757	+	CG	0.00361011	277
chr1	4571758	-	CG	0.0232558	129
chr1	4571759	+	CG	0	277
chr1	4571760	-	CG	0	131
chr1	4571771	+	CG	0.0108696	276
chr1	4571772	-	CG	0	130
chr1	4571773	+	CG	0	276
chr1	4571774	-	CG	0	131
chr1	4571782	+	CG	0.00363636	275
chr1	4571783	-	CG	0	131
chr1	4571804	-	CG	0.0155039	129
chr1	4571827	+	CG	0.062341	786
chr1	4571832	+	CG	0.00379267	791
chr1	4571833	-	CG	0.00437318	686
chr1	4571834	+	CG	0.00379267	791
chr1	4571835	-	CG	0.00145773	686
chr1	4571840	+	CG	0.00255102	784
chr1	4571841	-	CG	0.00728863	686
chr1	4571843	+	CG	0.00505689	791
chr1	4571844	-	CG	0.00874636	686
chr1	4571858	+	CG	0.00506329	790
chr1	4571859	-	CG	0.0058309	686
chr1	4571883	+	CG	0.0651341	261
chr1	4571884	-	CG	0.0832117	685
chr1	4571890	+	CG	0.00381679	262
chr1	4571891	-	CG	0.00347826	575
chr1	4571892	+	CG	0	262
chr1	4571893	-	CG	0.00173913	575
chr1	4571894	+	CG	0.00383142	261
chr1	4571895	-	CG	0.00347826	575
chr1	4571904	+	CG	0.00381679	262
chr1	4571905	-	CG	0.00522648	574
chr1	4571914	+	CG	0	262
chr1	4571915	-	CG	0.00869565	575
chr1	4571924	+	CG	0	262
chr1	4571925	-	CG	0.00347826	575
chr1	4571944	+	CG	0.0577558	606
chr1	4571945	-	CG	0.0856643	572
chr1	4571950	+	CG	0	605
chr1	4571951	-	CG	0.00754717	795
chr1	4571952	+	CG	0.00823723	607
chr1	4571953	-	CG	0.00125786	795
chr1	4571958	+	CG	0.00823723	607
chr1	4571959	-	CG	0.00628141	796
chr1	4571970	+	CG	0.00656814	609
chr1	4571971	-	CG	0.00627353	797
chr1	4572000	+	CG	0.00328947	608
chr1	4572001	-	CG	0.00250941	797
chr1	4572016	+	CG	0.00492611	609
chr1	4572017	-	CG	0.00250941	797
chr1	4572023	+	CG	0.00492611	609
chr1	4572024	-	CG	0	793
chr1	4572032	-	CG	0.0707071	792
chr1	4590553	+	CG	0.974522	157
chr1	4590700	-	CG	0.979275	193
chr1	4607756	+	CG	0.976562	128
chr1	4607876	+	CG	0.0396825	126
chr1	4607877	-	CG	0.939394	33
chr1	4607907	-	CG	0.969697	33
chr1	4688280	+	CG	0.964981	771
chr1	4688310	+	CG	0.959897	773
chr1	4688311	-	CG	0.947473	1009
chr1	4688319	+	CG	0.974093	772
chr1	4688320	-	CG	0.981169	1009
chr1	4688330	+	CG	0.958388	769
chr1	4688331	-	CG	0.974232	1009
chr1	4688345	+	CG	0.955959	772
chr1	4688346	-	CG	0.951341	1007
chr1	4688348	+	CG	0.94696	773
chr1	4688349	-	CG	0.946322	1006
chr1	4688352	-	CG	0.957256	1006
chr1	4695296	+	CG	1	9
chr1	4695381	-	CG	1	13
chr1	4708825	+	CG	0.980769	312
chr1	4708931	-	CG	0.892857	28
chr1	4709264	+	CG	0.9375	32
chr1	4727357	+	CG	0.96	50
chr1	4727508	-	CG	0.979167	48
chr1	4758132	+	CG	1	6
chr1	4758144	+	CG	1	5
chr1	4760183	-	CG	1	5
chr1	4760187	-	CG	0.4	5
chr1	4760740	+	CG	0.7	10
chr1	4760955	+	CG	0.818182	11
chr1	4760980	+	CG	1	11
chr1	4763311	+	CG	1	24
chr1	4763430	+	CG	1	6
chr1	4763431	-	CG	1	29
chr1	4763691	-	CG	0.945946	37
chr1	4788662	+	CG	1	110
chr1	4788663	-	CG	0.2	5
chr1	4788665	+	CG	0.963636	110
chr1	4788666	-	CG	0.950413	242
chr1	4788680	+	CG	0.927273	110
chr1	4788681	-	CG	0.958678	242
chr1	4788822	+	CG	0.982143	112
chr1	4788823	-	CG	0.991632	239
chr1	4788833	-	CG	0.987395	238
chr1	4800164	+	CG	0.954545	22
chr1	4800169	+	CG	1	22
chr1	4800170	-	CG	0.961538	52
chr1	4800195	+	CG	0.954545	22
chr1	4800196	-	CG	0.942308	52
chr1	4800202	+	CG	0.956522	23
chr1	4800203	-	CG	0.980769	52
chr1	4800208	+	CG	0.869565	23
chr1	4800209	-	CG	0.923077	52
chr1	4800393	-	CG	0.944444	54
chr1	4807908	+	CG	0.0816901	355
chr1	4807919	+	CG	0	355
chr1	4807920	-	CG	0	325
chr1	4807934	+	CG	0	355
chr1	4807935	-	CG	0.00619195	323
chr1	4807939	+	CG	0.0084507	355
chr1	4807940	-	CG	0.00923077	325
chr1	4807946	+	CG	0.0084507	355
chr1	4807947	-	CG	0	324
chr1	4807949	+	CG	0.0056338	355
chr1	4807950	-	CG	0	325
chr1	4807958	-	CG	0.0709877	324
chr1	4807998	+	CG	0.056338	781
chr1	4808015	+	CG	0.00378788	792
chr1	4808016	-	CG	0.00493827	810
chr1	4808027	+	CG	0.00252207	793
chr1	4808028	-	CG	0.00376412	797
chr1	4808030	+	CG	0.00252207	793
chr1	4808031	-	CG	0.0049505	808
chr1	4808032	+	CG	0.00252207	793
chr1	4808033	-	CG	0.00247219	809
chr1	4808034	+	CG	0.0037831	793
chr1	4808035	-	CG	0.00246914	810
chr1	4808042	+	CG	0.00252845	791
chr1	4808043	-	CG	0.00493827	810
chr1	4808046	+	CG	0.0037831	793
chr1	4808047	-	CG	0.00370828	809
chr1	4808048	+	CG	0.00126103	793
chr1	4808049	-	CG	0.00247831	807
chr1	4808051	+	CG	0.00126263	792
chr1	4808052	-	CG	0.00623441	802
chr1	4808056	+	CG	0.00379267	791
chr1	4808057	-	CG	0.00123916	807
chr1	4808058	+	CG	0.00252845	791
chr1	4808059	-	CG	0.00742574	808
chr1	4808068	-	CG	0.0646766	804
chr1	4808091	+	CG	0.036036	222
chr1	4808094	+	CG	0.00896861	223
chr1	4808095	-	CG	0.00233645	428
chr1	4808099	+	CG	0.0044843	223
chr1	4808100	-	CG	0.0046729	428
chr1	4808102	+	CG	0.00446429	224
chr1	4808103	-	CG	0.00700935	428
chr1	4808179	+	CG	0.00440529	227
chr1	4808180	-	CG	0.00700935	428
chr1	4808197	+	CG	0.00881057	227
chr1	4808198	-	CG	0.00702576	427
chr1	4808226	-	CG	0.0443925	428
chr1	4808776	+	CG	0.263736	91
chr1	4808960	+	CG	0.462366	93
chr1	4808961	-	CG	0.5	48
chr1	4808988	-	CG	0.875	48
chr1	4812186	+	CG	1	11
chr1	4812199	+	CG	0.545455	11
chr1	4812200	-	CG	0.75	8
chr1	4812229	+	CG	0.272727	11
chr1	4812230	-	CG	0.5	8
chr1	4812239	+	CG	0.833333	6
chr1	4812253	+	CG	0.428571	7
chr1	4823708	-	CG	0.777778	27
chr1	4823722	-	CG	0.15	20
chr1	4823762	-	CG	0.111111	27
chr1	4823774	-	CG	1	27
chr1	4839196	+	CG	0.963964	111
chr1	4839200	+	CG	0.972973	111
chr1	4839201	-	CG	0.987421	159
chr1	4839208	+	CG	0.981982	111
chr1	4839209	-	CG	0.962264	159
chr1	4839212	+	CG	0.972973	111
chr1	4839213	-	CG	0.968553	159
chr1	4839362	-	CG	0.860759	158
chr1	4857516	+	CG	0.0954839	775
chr1	4857527	+	CG	0.00128205	780
chr1	4857528	-	CG	0.00141044	709
chr1	4857537	+	CG	0.00641026	780
chr1	4857538	-	CG	0.00141044	709
chr1	4857550	+	CG	0.00641026	780
chr1	4857551	-	CG	0.00284091	704
chr1	4857573	+	CG	0.0025641	780
chr1	4857574	-	CG	0.00564175	709
chr1	4857583	-	CG	0.070922	705
chr1	4857631	+	CG	0.0330579	242
chr1	4857654	+	CG	0.00421941	237
chr1	4857655	-	CG	0	179
chr1	4857676	+	CG	0	244
chr1	4857677	-	CG	0	178
chr1	4857741	+	CG	0	6
chr1	4857743	+	CG	0	7
chr1	4857745	+	CG	0	7
chr1	4857747	+	CG	0	7
chr1	4857763	+	CG	0.00411523	243
chr1	4857764	-	CG	0.0110497	181
chr1	4857775	+	CG	0.00413223	242
chr1	4857776	-	CG	0.0110497	181
chr1	4857780	+	CG	0	243
chr1	4857781	-	CG	0.00552486	181
chr1	4857793	+	CG	0	238
chr1	4857794	-	CG	0	181
chr1	4857796	+	CG	0	238
chr1	4857797	-	CG	0.00552486	181
chr1	4857798	+	CG	0	238
chr1	4857799	-	CG	0.00552486	181
chr1	4857804	-	CG	0.0224719	178
chr1	4857907	+	CG	0.052729	1081
chr1	4857922	+	CG	0.00276243	1086
chr1	4857923	-	CG	0.00223714	447
chr1	4857932	+	CG	0.00367985	1087
chr1	4857933	-	CG	0.00447427	447
chr1	4857975	+	CG	0.00459982	1087
chr1	4857976	-	CG	0.00672646	446
chr1	4857982	+	CG	0.00184332	1085
chr1	4857983	-	CG	0.00671141	447
chr1	4857986	+	CG	0.00184332	1085
chr1	4857987	-	CG	0.00447427	447
chr1	4857993	-	CG	0.0678733	442
chr1	4858078	+	CG	0.0753138	717
chr1	4858092	+	CG	0.00554785	721
chr1	4858093	-	CG	0.00912409	548
chr1	4858103	+	CG	0.00276625	723
chr1	4858104	-	CG	0.00545455	550
chr1	4858107	+	CG	0.00414938	723
chr1	4858108	-	CG	0.00363636	550
chr1	4858133	+	CG	0.00138504	722
chr1	4858134	-	CG	0.00363636	550
chr1	4858136	+	CG	0.00414938	723
chr1	4858137	-	CG	0.0018315	546
chr1	4858156	+	CG	0.0013947	717
chr1	4858157	-	CG	0.00727273	550
chr1	4858163	+	CG	0.0041841	717
chr1	4858164	-	CG	0.00183486	545
chr1	4858166	+	CG	0.0069735	717
chr1	4858167	-	CG	0.0109489	548
chr1	4858169	+	CG	0.0606061	132
chr1	4858170	-	CG	0.0749543	547
chr1	4858183	+	CG	0.00757576	132
chr1	4858184	-	CG	0.0049505	202
chr1	4858189	+	CG	0.00757576	132
chr1	4858190	-	CG	0.0049505	202
chr1	4858199	+	CG	0	133
chr1	4858200	-	CG	0.00497512	201
chr1	4858201	+	CG	0	133
chr1	4858202	-	CG	0.0049505	202
chr1	4858215	+	CG	0	133
chr1	4858216	-	CG	0.0049505	202
chr1	4858281	+	CG	0.0152672	131
chr1	4858282	-	CG	0	201
chr1	4858284	+	CG	0.00763359	131
chr1	4858285	-	CG	0.0102564	195
chr1	4858299	+	CG	0	131
chr1	4858300	-	CG	0	201
chr1	4858306	+	CG	0	130
chr1	4858307	-	CG	0	201
chr1	4858310	+	CG	0	128
chr1	4858311	-	CG	0.00497512	201
chr1	4858319	-	CG	0.0603015	199
chr1	4864937	+	CG	0.964286	112
chr1	4865101	-	CG	0.932203	59
chr1	4879878	+	CG	0.833333	6
chr1	4879888	+	CG	1	6
chr1	4891115	-	CG	0	24
chr1	4891119	-	CG	1	24
chr1	4891132	-	CG	0.958333	24
chr1	4906332	+	CG	0.928571	14
chr1	4906577	-	CG	0.982759	58
chr1	4912170	+	CG	0.984293	191
chr1	4912279	+	CG	0.953488	43
chr1	4912280	-	CG	0.952965	489
chr1	4912290	+	CG	0.930233	43
chr1	4912291	-	CG	0.939394	165
chr1	4912450	+	CG	0.954545	44
chr1	4912451	-	CG	0.939759	166
chr1	4912463	-	CG	0.957831	166
chr1	4916335	-	CG	0.816667	60
chr1	4916341	-	CG	0.866667	60
chr1	4916373	-	CG	0.783333	60
chr1	4924873	+	CG	0.888889	9
chr1	4924904	+	CG	1	10
chr1	4924923	+	CG	0.9	10
chr1	4932093	+	CG	0.982143	168
chr1	4932215	+	CG	0.970588	170
chr1	4932216	-	CG	0.966912	272
chr1	4932227	+	CG	0.970588	170
chr1	4932228	-	CG	0.970588	272
chr1	4932232	+	CG	0.970414	169
chr1	4932233	-	CG	0.977941	272
chr1	4932236	+	CG	0.964497	169
chr1	4932237	-	CG	0.988971	272
chr1	4932261	-	CG	0.941176	272
chr1	4947312	+	CG	0.795987	598
chr1	4947334	+	CG	0.895	600
chr1	4947335	-	CG	0.917986	695
chr1	4947370	+	CG	0.821369	599
chr1	4947371	-	CG	0.862717	692
chr1	4947372	+	CG	0.913043	598
chr1	4947373	-	CG	0.936416	692
chr1	4947406	-	CG	0.914863	693
chr1	4947571	+	CG	1	6
chr1	4947722	+	CG	1	6
chr1	4953113	+	CG	0.9	10
chr1	4985443	+	CG	0.833333	24
chr1	4985480	+	CG	0.875	24
chr1	4985484	+	CG	0.833333	24
chr1	4985491	+	CG	0.458333	24
chr1	4986357	+	CG	0.976	125
chr1	4986379	+	CG	0.96	125
chr1	4986380	-	CG	0.983607	61
chr1	4986392	+	CG	0.929134	127
chr1	4986393	-	CG	0.95082	61
chr1	4986550	+	CG	0.968504	127
chr1	4986551	-	CG	0.916667	60
chr1	4986558	-	CG	1	60
chr1	4987907	+	CG	1	11
chr1	4987914	+	CG	0.986408	515
chr1	4987915	-	CG	0	12
chr1	4987922	+	CG	0.986434	516
chr1	4987923	-	CG	0.971223	834
chr1	4987945	+	CG	0.976699	515
chr1	4987946	-	CG	0.973621	834
chr1	4987968	+	CG	0.984496	516
chr1	4987969	-	CG	0.977218	834
chr1	4987980	+	CG	0.992995	571
chr1	4987981	-	CG	0.991587	832
chr1	4987985	+	CG	0.984348	575
chr1	4987986	-	CG	0.979849	397
chr1	4988007	+	CG	0.921739	575
chr1	4988008	-	CG	0.9325	400
chr1	4988086	+	CG	1	59
chr1	4988087	-	CG	0.984848	396
chr1	4988095	+	CG	0.966102	59
chr1	4988096	-	CG	0.974576	118
chr1	4988316	-	CG	0.983051	118
chr1	5018897	+	CG	0.0223214	224
chr1	5018910	+	CG	0	224
chr1	5018911	-	CG	0.00451467	443
chr1	5018915	+	CG	0.00446429	224
chr1	5018916	-	CG	0.00452489	442
chr1	5018943	+	CG	0.00892857	224
chr1	5018944	-	CG	0	441
chr1	5019021	+	CG	0.0135135	222
chr1	5019022	-	CG	0.00675676	444
chr1	5019028	+	CG	0.00900901	222
chr1	5019029	-	CG	0.00453515	441
chr1	5019045	+	CG	0.028169	142
chr1	5019046	-	CG	0.0409091	440
chr1	5019077	+	CG	0.0140845	142
chr1	5019078	-	CG	0	223
chr1	5019091	+	CG	0	142
chr1	5019092	-	CG	0.00896861	223
chr1	5019163	+	CG	0	140
chr1	5019164	-	CG	0.0045045	222
chr1	5019190	-	CG	0.0547945	219
chr1	5019539	+	CG	0.0526316	228
chr1	5019542	+	CG	0	230
chr1	5019543	-	CG	0.00585938	512
chr1	5019546	+	CG	0.00434783	230
chr1	5019547	-	CG	0.0078125	512
chr1	5019550	+	CG	0	230
chr1	5019551	-	CG	0	512
chr1	5019581	+	CG	0.00421941	237
chr1	5019582	-	CG	0	520
chr1	5019594	+	CG	0	8
chr1	5019595	-	CG	0	9
chr1	5019602	+	CG	0	9
chr1	5019603	-	CG	0	9
chr1	5019611	+	CG	0.00847458	236
chr1	5019612	-	CG	0	7
chr1	5019642	+	CG	0.00423729	236
chr1	5019643	-	CG	0	519
chr1	5019646	+	CG	0	236
chr1	5019647	-	CG	0.00192678	519
chr1	5019650	+	CG	0.00847458	236
chr1	5019651	-	CG	0.00770713	519
chr1	5019658	+	CG	0	22
chr1	5019659	-	CG	0.0505837	514
chr1	5019682	+	CG	0	22
chr1	5019683	-	CG	0	8
chr1	5019687	+	CG	0	22
chr1	5019688	-	CG	0	8
chr1	5019701	+	CG	0.0434783	23
chr1	5019702	-	CG	0	8
chr1	5019704	+	CG	0	20
chr1	5019705	-	CG	0	8
chr1	5019847	+	CG	0.04	25
chr1	5019848	-	CG	0	10
chr1	5019858	+	CG	0	25
chr1	5019859	-	CG	0	10
chr1	5019860	+	CG	0	25
chr1	5019861	-	CG	0	10
chr1	5019885	+	CG	0.0458716	109
chr1	5019886	-	CG	0	10
chr1	5019892	+	CG	0.00909091	110
chr1	5019893	-	CG	0.00189394	528
chr1	5019894	+	CG	0.00909091	110
chr1	5019895	-	CG	0.0132576	528
chr1	5019909	+	CG	0.018018	111
chr1	5019910	-	CG	0.0113422	529
chr1	5020037	+	CG	0.0730659	698
chr1	5020038	-	CG	0.0508475	531
chr1	5020055	+	CG	0.0042735	702
chr1	5020056	-	CG	0.0131004	229
chr1	5020072	+	CG	0.0057554	695
chr1	5020073	-	CG	0.0131004	229
chr1	5020116	-	CG	0.0844444	225
chr1	5020123	+	CG	0.0505837	257
chr1	5020141	+	CG	0.00381679	262
chr1	5020142	-	CG	0.0178971	447
chr1	5020162	+	CG	0	237
chr1	5020163	-	CG	0.00894855	447
chr1	5020171	+	CG	0.0114504	262
chr1	5020172	-	CG	0.0178971	447
chr1	5020190	-	CG	0.073991	446
chr1	5020575	+	CG	0.0824524	473
chr1	5020612	+	CG	0.036036	444
chr1	5020613	-	CG	0.0399556	901
chr1	5020646	-	CG	0.100897	892
chr1	5022851	+	CG	0.102484	322
chr1	5022863	+	CG	0.0434783	322
chr1	5022864	-	CG	0.0698529	272
chr1	5022897	+	CG	0.0411392	316
chr1	5022898	-	CG	0.0330882	272
chr1	5022926	+	CG	0.0371517	323
chr1	5022927	-	CG	0.0441176	272
chr1	5022929	+	CG	0.0432099	324
chr1	5022930	-	CG	0.0367647	272
chr1	5022935	+	CG	0.0464396	323
chr1	5022936	-	CG	0.0514706	272
chr1	5022941	+	CG	0.0402477	323
chr1	5022942	-	CG	0.0330882	272
chr1	5022945	+	CG	0.0433437	323
chr1	5022946	-	CG	0.0520446	269
chr1	5022970	-	CG	0.071161	267
chr1	5023356	+	CG	0.137615	109
chr1	5023359	+	CG	0.0825688	109
chr1	5023360	-	CG	0	6
chr1	5023384	+	CG	0.0825688	109
chr1	5023385	-	CG	0	6
chr1	5023512	+	CG	0.027027	111
chr1	5023513	-	CG	0	7
chr1	5023520	+	CG	0.036036	111
chr1	5023521	-	CG	0.142857	7
chr1	5023530	+	CG	0	111
chr1	5023531	-	CG	0.142857	7
chr1	5023553	+	CG	0.0514286	175
chr1	5023554	-	CG	0	7
chr1	5023713	+	CG	0.00564972	177
chr1	5023714	-	CG	0.00829876	241
chr1	5023724	+	CG	0	12
chr1	5023725	-	CG	0.0627615	239
chr1	5023765	+	CG	0.0833333	12
chr1	5023766	-	CG	0.0666667	15
chr1	5023974	-	CG	0.285714	14
chr1	5034964	+	CG	0.916244	394
chr1	5035115	-	CG	0.954545	132
chr1	5040706	-	CG	0	6
chr1	5040713	-	CG	1	7
chr1	5040722	-	CG	1	7
chr1	5040750	+	CG	0.913043	138
chr1	5040751	-	CG	1	6
chr1	5040791	+	CG	0.673913	138
chr1	5040792	-	CG	0.881013	790
chr1	5040793	+	CG	0.862319	138
chr1	5040794	-	CG	0.946903	791
chr1	5040871	+	CG	0.964286	140
chr1	5040872	-	CG	0.913208	795
chr1	5040907	-	CG	0.949622	794
chr1	5044304	+	CG	0.964912	114
chr1	5044347	+	CG	0.643478	115
chr1	5044348	-	CG	0.684211	19
chr1	5044498	+	CG	0.878261	115
chr1	5044499	-	CG	0.9	20
chr1	5044508	-	CG	1	20
chr1	5046621	+	CG	0.833333	24
chr1	5046632	+	CG	0.625	24
chr1	5046633	-	CG	0.709677	62
chr1	5046743	+	CG	0.72	25
chr1	5046744	-	CG	0.629032	62
chr1	5046769	+	CG	0.92	25
chr1	5046770	-	CG	0.836066	61
chr1	5046788	-	CG	0.95082	61
chr1	5047417	-	CG	0.9	50
chr1	5047449	-	CG	0.865385	52
chr1	5047482	-	CG	0.960784	51
chr1	5052431	+	CG	0.910256	78
chr1	5052524	+	CG	0.987342	79
chr1	5052525	-	CG	0.981997	611
chr1	5052533	+	CG	0.962025	79
chr1	5052534	-	CG	0.977011	609
chr1	5052538	-	CG	0.963875	609
chr1	5066737	+	CG	0.888268	179
chr1	5066767	+	CG	0.694444	180
chr1	5071734	+	CG	0.933333	15
chr1	5076842	+	CG	1	6
chr1	5076918	-	CG	0	15
chr1	5076922	-	CG	0.6	15
chr1	5076971	-	CG	0.931707	205
chr1	5077002	-	CG	0.666667	12
chr1	5077011	-	CG	0.461538	13
chr1	5077039	-	CG	0.923077	13
chr1	5077043	-	CG	0.538462	13
chr1	5082047	+	CG	1	14
chr1	5082285	-	CG	1	27
chr1	5082331	-	CG	1	5
chr1	5083139	+	CG	0.0569307	404
chr1	5083160	+	CG	0	407
chr1	5083161	-	CG	0.00414079	483
chr1	5083165	+	CG	0.00246305	406
chr1	5083166	-	CG	0.00207039	483
chr1	5083174	+	CG	0.004914	407
chr1	5083175	-	CG	0.00621118	483
chr1	5083180	+	CG	0.00490196	408
chr1	5083181	-	CG	0.00619835	484
chr1	5083186	+	CG	0.00244499	409
chr1	5083187	-	CG	0.00207469	482
chr1	5083205	+	CG	0.00737101	407
chr1	5083206	-	CG	0.00623701	481
chr1	5083222	+	CG	0.00738916	406
chr1	5083223	-	CG	0.00417537	479
chr1	5083229	+	CG	0.00246305	406
chr1	5083230	-	CG	0.00209205	478
chr1	5083233	+	CG	0.0629496	556
chr1	5083234	-	CG	0.0655391	473
chr1	5083236	+	CG	0.0036036	555
chr1	5083237	-	CG	0.00435414	689
chr1	5083244	+	CG	0.005386	557
chr1	5083245	-	CG	0.00290276	689
chr1	5083248	+	CG	0.00359066	557
chr1	5083249	-	CG	0.00145349	688
chr1	5083252	+	CG	0.00359066	557
chr1	5083253	-	CG	0.00725689	689
chr1	5083266	+	CG	0.00359066	557
chr1	5083267	-	CG	0.00289436	691
chr1	5083286	+	CG	0.005386	557
chr1	5083287	-	CG	0.00729927	685
chr1	5083303	+	CG	0	6
chr1	5083304	-	CG	0.0726744	688
chr1	5083333	+	CG	0.0669546	463
chr1	5083337	+	CG	0.0129032	465
chr1	5083338	-	CG	0.00244499	409
chr1	5083339	+	CG	0.00645161	465
chr1	5083340	-	CG	0.00488998	409
chr1	5083351	+	CG	0.00645161	465
chr1	5083352	-	CG	0.00731707	410
chr1	5083357	+	CG	0	464
chr1	5083358	-	CG	0.00244499	409
chr1	5083376	+	CG	0.00240385	416
chr1	5083377	-	CG	0.00729927	411
chr1	5083393	+	CG	0.00860215	465
chr1	5083394	-	CG	0	410
chr1	5083395	+	CG	0	465
chr1	5083396	-	CG	0.0097561	410
chr1	5083416	+	CG	0	7
chr1	5083417	-	CG	0.0646766	402
chr1	5132166	+	CG	1	16
chr1	5166278	+	CG	0.926829	287
chr1	5166279	-	CG	0.928571	14
chr1	5166412	-	CG	0.976019	417
chr1	5170394	+	CG	0.968085	94
chr1	5170402	+	CG	0.957447	94
chr1	5170403	-	CG	0.952055	146
chr1	5170428	+	CG	0.914894	94
chr1	5170429	-	CG	0.965986	147
chr1	5170570	+	CG	0.904255	94
chr1	5170571	-	CG	0.965517	145
chr1	5170585	+	CG	0.968085	94
chr1	5170586	-	CG	0.986207	145
chr1	5170588	+	CG	0.946809	94
chr1	5170589	-	CG	0.958621	145
chr1	5170599	+	CG	0.951049	143
chr1	5170600	-	CG	0.97931	145
chr1	5170626	+	CG	0.958333	144
chr1	5170627	-	CG	0.857143	7
chr1	5170637	+	CG	0.993103	145
chr1	5170638	-	CG	1	7
chr1	5170745	+	CG	0.867133	143
chr1	5170746	-	CG	1	7
chr1	5170747	+	CG	0.776224	143
chr1	5170748	-	CG	0.857143	7
chr1	5170759	+	CG	0.902098	143
chr1	5170760	-	CG	0.857143	7
chr1	5170765	-	CG	1	7
chr1	5175456	+	CG	0.957672	189
chr1	5175569	-	CG	0.737261	628
chr1	5184470	+	CG	0.901099	728
chr1	5184496	+	CG	0.944065	733
chr1	5184497	-	CG	0.909341	728
chr1	5184523	+	CG	0.920657	731
chr1	5184524	-	CG	0.928669	729
chr1	5184540	-	CG	0.955801	724
chr1	5189203	-	CG	0	303
chr1	5189206	+	CG	0.977654	179
chr1	5189207	-	CG	0.00328947	304
chr1	5189226	+	CG	0.983333	180
chr1	5189227	-	CG	0.95122	328
chr1	5189242	+	CG	0.00568182	176
chr1	5189243	-	CG	0.911854	329
chr1	5189281	+	CG	0.945205	73
chr1	5189289	+	CG	0.891892	74
chr1	5189290	-	CG	0.85	20
chr1	5189291	+	CG	0.932432	74
chr1	5189292	-	CG	0.9	20
chr1	5189329	+	CG	0.85	40
chr1	5189340	+	CG	0.935028	354
chr1	5189356	+	CG	0.802817	355
chr1	5189357	-	CG	0.446809	94
chr1	5189374	+	CG	0.881443	388
chr1	5189375	-	CG	0.777778	99
chr1	5189394	+	CG	0.917989	378
chr1	5189395	-	CG	0.861702	94
chr1	5189399	+	CG	0.857143	378
chr1	5189400	-	CG	0.734043	94
chr1	5189409	+	CG	0.947644	191
chr1	5189410	-	CG	0.884211	95
chr1	5189440	+	CG	0.963351	191
chr1	5189441	-	CG	0.973941	307
chr1	5189456	+	CG	0.975124	201
chr1	5189457	-	CG	0.915605	628
chr1	5189477	+	CG	0.900498	201
chr1	5189478	-	CG	0.832	625
chr1	5189481	+	CG	0.915423	201
chr1	5189482	-	CG	0.9296	625
chr1	5189496	-	CG	0.970968	620
chr1	5189554	+	CG	0.940667	809
chr1	5189555	-	CG	0.928571	28
chr1	5189570	+	CG	0.928659	813
chr1	5189574	+	CG	0.97171	813
chr1	5189608	+	CG	0.973978	807
chr1	5195338	+	CG	0.95122	123
chr1	5195488	-	CG	0.918367	49
chr1	5254555	-	CG	0.666667	9
chr1	5254588	-	CG	0.888889	9
chr1	5254698	-	CG	1	9
chr1	5260834	+	CG	0.901639	61
chr1	5261035	+	CG	0.52381	63
chr1	5261036	-	CG	0.52381	42
chr1	5261043	+	CG	0.492063	63
chr1	5261044	-	CG	0.512195	41
chr1	5261051	+	CG	0.888889	63
chr1	5261052	-	CG	0.880952	42
chr1	5261063	-	CG	0.833333	42
chr1	5266971	+	CG	0.984615	130
chr1	5267001	+	CG	0.893939	132
chr1	5267002	-	CG	0.804196	143
chr1	5267122	-	CG	0.979021	143
chr1	5272761	+	CG	0.924574	411
chr1	5272766	+	CG	0.746959	411
chr1	5272784	+	CG	0.839907	431
chr1	5272793	+	CG	0.952381	21
chr1	5272794	-	CG	0.982759	58
chr1	5272918	+	CG	1	16
chr1	5272919	-	CG	0.912281	57
chr1	5272925	+	CG	1	15
chr1	5272926	-	CG	0.964912	57
chr1	5272929	+	CG	1	15
chr1	5272930	-	CG	0.789474	57
chr1	5272932	+	CG	1	15
chr1	5272933	-	CG	0.964912	57
chr1	5272942	+	CG	1	9
chr1	5272943	-	CG	0.929825	57
chr1	5272962	+	CG	0.926887	424
chr1	5272967	+	CG	0.747642	424
chr1	5272985	+	CG	0.82783	424
chr1	5273025	+	CG	1	6
chr1	5275233	+	CG	0.832936	419
chr1	5275299	+	CG	0.92399	421
chr1	5275300	-	CG	0.886269	721
chr1	5275321	-	CG	0.956944	720
chr1	5288302	+	CG	0.939024	82
chr1	5288344	+	CG	0.939024	82
chr1	5288345	-	CG	0.989796	98
chr1	5288355	-	CG	0.969388	98
chr1	5293930	-	CG	0.966667	150
chr1	5299164	+	CG	0.85044	341
chr1	5299281	+	CG	0.444767	344
chr1	5299282	-	CG	0.8125	64
chr1	5299292	+	CG	0.938953	344
chr1	5299293	-	CG	0.96875	64
chr1	5299310	+	CG	0.949153	177
chr1	5299311	-	CG	0.953125	64
chr1	5299404	+	CG	0.779661	177
chr1	5299405	-	CG	0.832184	435
chr1	5299432	+	CG	0.904494	178
chr1	5299433	-	CG	0.942529	435
chr1	5299451	-	CG	0.974537	432
chr1	5320283	+	CG	0.959459	74
chr1	5320478	+	CG	0.821229	537
chr1	5320479	-	CG	0.776316	76
chr1	5320571	-	CG	0.876245	703
chr1	5350421	-	CG	0.870801	387
chr1	5350424	-	CG	0.958656	387
chr1	5350461	-	CG	0.904145	386
chr1	5350572	-	CG	0.2	5
chr1	5350575	+	CG	0.924528	53
chr1	5350576	-	CG	0	5
chr1	5350587	+	CG	0.886792	53
chr1	5350588	-	CG	0.793388	121
chr1	5350608	+	CG	0.754717	53
chr1	5350609	-	CG	0.793388	121
chr1	5350612	+	CG	0.981132	53
chr1	5350613	-	CG	0.950413	121
chr1	5350625	+	CG	0.995074	203
chr1	5350626	-	CG	0.991453	117
chr1	5350632	+	CG	0.965517	203
chr1	5350635	+	CG	0.990148	203
chr1	5350743	-	CG	0.913386	381
chr1	5350753	-	CG	0.9	10
chr1	5350769	-	CG	0.2	5
chr1	5350784	-	CG	0.222222	9
chr1	5350787	+	CG	0.979814	644
chr1	5350788	-	CG	0.111111	9
chr1	5350799	+	CG	0.891808	647
chr1	5350800	-	CG	0.821429	56
chr1	5350820	+	CG	0.859351	647
chr1	5350821	-	CG	0.755102	49
chr1	5350824	+	CG	0.982998	647
chr1	5350825	-	CG	0.938776	49
chr1	5350838	-	CG	1	11
chr1	5350915	+	CG	0.977401	177
chr1	5350916	-	CG	0	7
chr1	5350929	+	CG	0.898876	178
chr1	5350930	-	CG	1	6
chr1	5350999	+	CG	0.965517	116
chr1	5351011	+	CG	0.922414	116
chr1	5351012	-	CG	0.88	50
chr1	5351032	+	CG	0.82906	117
chr1	5351033	-	CG	0.76	50
chr1	5351036	+	CG	0.948718	117
chr1	5351037	-	CG	0.98	50
chr1	5351050	-	CG	1	50
chr1	5351141	+	CG	0.764706	119
chr1	5351142	-	CG	1	7
chr1	5351166	+	CG	0.892157	102
chr1	5351167	-	CG	0.875	8
chr1	5351177	-	CG	1	8
chr1	5351211	+	CG	0.949686	159
chr1	5351244	+	CG	0.900621	161
chr1	5351245	-	CG	0.952663	169
chr1	5351248	+	CG	0.968944	161
chr1	5351249	-	CG	0.95858	169
chr1	5351263	-	CG	0.922619	168
chr1	5380705	+	CG	0.941176	34
chr1	5380880	-	CG	0.930502	259
chr1	5423628	+	CG	0.91904	667
chr1	5423665	+	CG	0.849254	670
chr1	5423666	-	CG	0.788079	755
chr1	5423715	-	CG	0.974834	755
chr1	5429341	-	CG	1	12
chr1	5429843	+	CG	1	5
chr1	5429878	+	CG	0.8	5
chr1	5429879	-	CG	0.954386	285
chr1	5429938	+	CG	0.972222	36
chr1	5429939	-	CG	1	24
chr1	5429956	+	CG	0.942857	35
chr1	5429957	-	CG	0.930818	159
chr1	5429960	+	CG	0.882353	34
chr1	5429961	-	CG	0.949686	159
chr1	5429999	+	CG	0.962963	27
chr1	5430000	-	CG	0.93038	158
chr1	5430028	+	CG	0.962963	27
chr1	5430029	-	CG	0.974257	505
chr1	5430032	+	CG	0.962963	27
chr1	5430033	-	CG	0.946535	505
chr1	5430037	+	CG	0.925926	27
chr1	5430038	-	CG	0.924752	505
chr1	5430044	+	CG	1	27
chr1	5430045	-	CG	0.89703	505
chr1	5430051	+	CG	0.965986	147
chr1	5430052	-	CG	0.962555	454
chr1	5430086	+	CG	0.966443	149
chr1	5430087	-	CG	0.906593	182
chr1	5430147	-	CG	1	13
chr1	5430164	+	CG	0.945946	37
chr1	5430165	-	CG	0.804878	164
chr1	5430166	+	CG	0.864865	37
chr1	5430167	-	CG	0.926829	164
chr1	5430168	+	CG	0.891892	37
chr1	5430169	-	CG	0.90184	163
chr1	5430207	+	CG	1	10
chr1	5430208	-	CG	0.95302	149
chr1	5430236	+	CG	0.972222	36
chr1	5430237	-	CG	0.96	50
chr1	5430240	+	CG	0.944444	36
chr1	5430241	-	CG	0.88	50
chr1	5430245	+	CG	0.916667	36
chr1	5430246	-	CG	0.88	50
chr1	5430252	+	CG	0.944444	36
chr1	5430253	-	CG	0.86	50
chr1	5430259	+	CG	1	5
chr1	5430260	-	CG	0.921569	51
chr1	5430294	+	CG	1	6
chr1	5430295	-	CG	0.885246	61
chr1	5430355	-	CG	1	14
chr1	5430372	+	CG	0.949045	157
chr1	5430373	-	CG	0.870968	248
chr1	5430374	+	CG	0.980892	157
chr1	5430375	-	CG	0.94	250
chr1	5430391	+	CG	0.949045	157
chr1	5430392	-	CG	0.832	250
chr1	5430415	+	CG	0.97619	84
chr1	5430416	-	CG	0.959839	249
chr1	5430444	+	CG	0.945055	91
chr1	5430445	-	CG	0.954128	109
chr1	5430448	+	CG	0.945055	91
chr1	5430449	-	CG	0.917431	109
chr1	5430467	+	CG	0.833333	6
chr1	5430502	+	CG	1	5
chr1	5430580	+	CG	0.978495	93
chr1	5430581	-	CG	0.952381	126
chr1	5430582	+	CG	0.956989	93
chr1	5430583	-	CG	0.991803	122
chr1	5430584	+	CG	0.956989	93
chr1	5430585	-	CG	0.97619	126
chr1	5430624	-	CG	0.959016	122
chr1	5436256	+	CG	0.985507	69
chr1	5436407	-	CG	0.984733	131
chr1	5526553	+	CG	0.959184	49
chr1	5526704	-	CG	1	27
chr1	5543846	-	CG	0.6	5
chr1	5545257	-	CG	1	5
chr1	5545528	-	CG	0.6	10
chr1	5545558	-	CG	0.6	10
chr1	5567129	+	CG	1	7
chr1	5567150	+	CG	0.857143	7
chr1	5567151	-	CG	0.857143	7
chr1	5567166	+	CG	1	7
chr1	5567167	-	CG	1	7
chr1	5567186	+	CG	0.222222	9
chr1	5567187	-	CG	0	7
chr1	5567196	+	CG	1	9
chr1	5567197	-	CG	0.714286	7
chr1	5567211	+	CG	0.888889	9
chr1	5567212	-	CG	1	7
chr1	5567226	+	CG	1	8
chr1	5567227	-	CG	0.857143	7
chr1	5567232	-	CG	1	7
chr1	5574303	+	CG	0.967033	182
chr1	5574344	+	CG	0.766304	184
chr1	5574345	-	CG	0.918919	74
chr1	5574451	-	CG	0.945946	74
chr1	5576106	-	CG	0.12963	54
chr1	5576180	+	CG	0.953846	130
chr1	5576181	-	CG	1	54
chr1	5576331	-	CG	1	49
chr1	5584498	+	CG	1	7
chr1	5584552	+	CG	0.917647	765
chr1	5584553	-	CG	0.941176	17
chr1	5584657	+	CG	0.932292	192
chr1	5584658	-	CG	0.964215	503
chr1	5584864	-	CG	0.844828	58
chr1	5589215	+	CG	0.569665	567
chr1	5589237	+	CG	0.518453	569
chr1	5589238	-	CG	0.542135	356
chr1	5589305	-	CG	0.77809	356
chr1	5677066	+	CG	0.951049	143
chr1	5677082	+	CG	0.86014	143
chr1	5677090	+	CG	0.902778	144
chr1	5677105	+	CG	0.894366	142
chr1	5677139	+	CG	0.923611	144
chr1	5678613	+	CG	0.977273	484
chr1	5678649	+	CG	0.682474	485
chr1	5678650	-	CG	0.751938	258
chr1	5678740	-	CG	0.775194	258
chr1	5702065	+	CG	0.961538	26
chr1	5702216	-	CG	1	17
chr1	5702295	-	CG	1	7
chr1	5730209	-	CG	0.666667	18
chr1	5734091	-	CG	0.971831	71
chr1	5742409	+	CG	0.97546	163
chr1	5742560	-	CG	1	17
chr1	5742606	-	CG	1	6
chr1	5742639	-	CG	0.833333	6
chr1	5747021	-	CG	1	5
chr1	5747023	-	CG	1	5
chr1	5747027	-	CG	1	5
chr1	5747029	-	CG	1	5
chr1	5747046	-	CG	1	5
chr1	5747058	-	CG	1	5
chr1	5747068	-	CG	1	5
chr1	5747102	+	CG	1	10
chr1	5747105	+	CG	1	10
chr1	5747126	+	CG	0	9
chr1	5747140	+	CG	1	9
chr1	5747147	+	CG	1	9
chr1	5747163	+	CG	1	9
chr1	5783325	-	CG	1	10
chr1	5796525	+	CG	0.952518	695
chr1	5796629	-	CG	0.958763	291
chr1	5810057	+	CG	1	13
chr1	5810110	+	CG	1	13
chr1	5810115	+	CG	1	13
chr1	5810120	+	CG	1	13
chr1	5820005	+	CG	0.907407	54
chr1	5820040	+	CG	0.944444	54
chr1	5820041	-	CG	0.960294	680
chr1	5820119	-	CG	0.772861	678
chr1	5820123	-	CG	0.952381	147
chr1	5820138	-	CG	0.938776	147
chr1	5820161	+	CG	0.952381	42
chr1	5820162	-	CG	0.924658	146
chr1	5820190	+	CG	0.976744	43
chr1	5820191	-	CG	0.975248	202
chr1	5820194	+	CG	0.976744	43
chr1	5820195	-	CG	0.891089	202
chr1	5820206	+	CG	0.930233	43
chr1	5820207	-	CG	0.846535	202
chr1	5820213	+	CG	0.969072	582
chr1	5820214	-	CG	0.940594	202
chr1	5820308	+	CG	0	47
chr1	5820326	+	CG	0.818182	22
chr1	5820327	-	CG	0.985507	69
chr1	5820328	+	CG	0.909091	22
chr1	5820329	-	CG	0.971014	69
chr1	5820330	+	CG	1	20
chr1	5820331	-	CG	0.971014	69
chr1	5820370	-	CG	0.898551	69
chr1	5820398	+	CG	0.928571	42
chr1	5820402	+	CG	0.863636	44
chr1	5820407	+	CG	0.909091	44
chr1	5820414	+	CG	0.953488	43
chr1	5820421	+	CG	1	5
chr1	5820456	+	CG	1	5
chr1	5820516	+	CG	0.916667	12
chr1	5820534	+	CG	0.973545	567
chr1	5820535	-	CG	0.931818	44
chr1	5820536	+	CG	0.938163	566
chr1	5820537	-	CG	0.977273	44
chr1	5820538	+	CG	0.719081	566
chr1	5820539	-	CG	0.954545	44
chr1	5820578	-	CG	1	42
chr1	5826212	+	CG	1	17
chr1	5829069	+	CG	0.950166	602
chr1	5829132	+	CG	0.952941	85
chr1	5829133	-	CG	0.909241	606
chr1	5829321	-	CG	0.940909	220
chr1	5850129	+	CG	0.823944	142
chr1	5850165	+	CG	0.819444	144
chr1	5850166	-	CG	0.833333	318
chr1	5850200	-	CG	1	5
chr1	5850295	-	CG	0.905063	316
chr1	5862684	+	CG	0.971429	35
chr1	5862873	-	CG	0.964286	28
chr1	5863243	+	CG	0.933333	45
chr1	5863393	+	CG	1	5
chr1	5863394	-	CG	0.953125	64
chr1	5863439	+	CG	0.6	5
chr1	5874921	+	CG	0.918919	148
chr1	5875082	+	CG	0.953947	152
chr1	5875083	-	CG	0.970149	134
chr1	5875125	+	CG	0.917308	520
chr1	5875126	-	CG	0.978102	137
chr1	5875149	+	CG	0.596929	521
chr1	5875150	-	CG	0.609272	604
chr1	5875247	-	CG	0.991708	603
chr1	5916135	+	CG	0.765721	811
chr1	5916218	+	CG	0.674877	812
chr1	5916219	-	CG	0.672209	421
chr1	5916244	+	CG	0.38089	764
chr1	5916245	-	CG	0.441527	419
chr1	5916280	+	CG	0.321053	760
chr1	5916281	-	CG	0.37605	476
chr1	5916314	+	CG	0.284404	763
chr1	5916315	-	CG	0.258947	475
chr1	5916333	-	CG	0.439232	469
chr1	5916643	+	CG	0.0660377	106
chr1	5916677	+	CG	0.00943396	106
chr1	5916678	-	CG	0.0305344	131
chr1	5916686	+	CG	0.0188679	106
chr1	5916687	-	CG	0.0229008	131
chr1	5916796	+	CG	0.00961538	104
chr1	5916805	+	CG	0.0285714	105
chr1	5916806	-	CG	0	133
chr1	5916821	+	CG	0.00952381	105
chr1	5916822	-	CG	0.0075188	133
chr1	5916823	+	CG	0.00952381	105
chr1	5916824	-	CG	0	132
chr1	5916831	+	CG	0.00952381	105
chr1	5916832	-	CG	0.0227273	132
chr1	5916839	+	CG	0.0285714	105
chr1	5916840	-	CG	0.0305344	131
chr1	5916844	-	CG	0.0538462	130
chr1	5917473	+	CG	0.0833333	36
chr1	5917721	-	CG	0.111111	9
chr1	5920367	+	CG	0.964912	57
chr1	5920517	-	CG	0.962963	54
chr1	5964080	+	CG	0.815789	38
chr1	5964185	+	CG	0.904762	21
chr1	5964186	-	CG	0.97377	305
chr1	5964205	+	CG	0	21
chr1	5982406	+	CG	0.96463	622
chr1	5982415	+	CG	0.966346	624
chr1	5982416	-	CG	0.958974	585
chr1	5982431	+	CG	0.939103	624
chr1	5982432	-	CG	0.933333	585
chr1	5982440	+	CG	0.956731	624
chr1	5982441	-	CG	0.97265	585
chr1	5982468	+	CG	0.983384	662
chr1	5982469	-	CG	0.977702	583
chr1	5982481	+	CG	0.975904	664
chr1	5982482	-	CG	0.970588	646
chr1	5982531	+	CG	0.933635	663
chr1	5982532	-	CG	0.948837	645
chr1	5982552	+	CG	0.896657	329
chr1	5982553	-	CG	0.876161	646
chr1	5982571	+	CG	0.887538	329
chr1	5982572	-	CG	0.907692	195
chr1	5982615	+	CG	0.93617	329
chr1	5982616	-	CG	0.948718	195
chr1	5982661	-	CG	0.969231	195
chr1	5991040	+	CG	0.5	36
chr1	5991075	+	CG	0	36
chr1	5993217	-	CG	0.823529	17
chr1	5993221	-	CG	0.0588235	17
chr1	5993235	-	CG	0.891304	46
chr1	5993255	-	CG	0.913043	46
chr1	5993260	-	CG	0.869565	46
chr1	5993269	+	CG	1	5
chr1	5993270	-	CG	0.934783	46
chr1	5993280	+	CG	0.166667	6
chr1	5993300	+	CG	1	6
chr1	5993301	-	CG	0.918033	61
chr1	5993316	+	CG	1	6
chr1	5993317	-	CG	0.825397	63
chr1	5993322	+	CG	0	6
chr1	5993323	-	CG	0	63
chr1	5993337	+	CG	1	6
chr1	5993338	-	CG	0.730159	63
chr1	5993341	+	CG	1	6
chr1	5993342	-	CG	0.920635	63
chr1	5998975	+	CG	0.977099	131
chr1	5999126	-	CG	0.958333	48
chr1	6012918	-	CG	1	22
chr1	6012961	-	CG	0.954545	22
chr1	6012965	-	CG	0.909091	22
chr1	6012974	-	CG	1	22
chr1	6013002	+	CG	1	8
chr1	6013003	-	CG	0.954545	22
chr1	6013040	+	CG	0.5	8
chr1	6013074	+	CG	1	8
chr1	6013089	+	CG	0.625	8
chr1	6013096	+	CG	0.5	8
chr1	6026898	+	CG	0.869369	222
chr1	6026899	-	CG	0	21
chr1	6026920	+	CG	0.910314	223
chr1	6026921	-	CG	0.89644	309
chr1	6026931	+	CG	0.959641	223
chr1	6026932	-	CG	0.951456	309
chr1	6026935	+	CG	0.964126	223
chr1	6026936	-	CG	0.945161	310
chr1	6027009	+	CG	0.973094	223
chr1	6027010	-	CG	0.975	320
chr1	6027011	+	CG	0.946188	223
chr1	6027012	-	CG	0.93125	320
chr1	6027013	+	CG	0.973094	223
chr1	6027014	-	CG	0.984375	320
chr1	6027053	-	CG	0.91195	318
chr1	6027096	+	CG	0.962617	214
chr1	6027112	+	CG	0.990654	214
chr1	6027113	-	CG	0.666667	306
chr1	6027118	+	CG	0.934579	214
chr1	6027119	-	CG	0.611111	306
chr1	6027175	+	CG	0.462617	214
chr1	6027176	-	CG	0.820189	317
chr1	6027205	-	CG	0.987342	316
chr1	6048026	+	CG	0.94709	189
chr1	6048176	-	CG	0.988235	170
chr1	6072701	-	CG	0.909091	11
chr1	6073509	+	CG	0.931034	87
chr1	6073649	+	CG	0.943182	88
chr1	6073650	-	CG	0.917949	585
chr1	6073656	-	CG	0.89726	584
chr1	6104418	+	CG	0.444444	27
chr1	6104419	-	CG	0.972603	73
chr1	6104564	-	CG	0.972222	72
chr1	6139284	-	CG	1	12
chr1	6139315	-	CG	1	11
chr1	6145223	+	CG	0.965517	29
chr1	6145374	-	CG	0.987179	78
chr1	6150858	+	CG	0.942177	294
chr1	6150919	+	CG	0.308244	279
chr1	6150933	+	CG	0.849462	279
chr1	6150934	-	CG	1	11
chr1	6150944	+	CG	0.799283	279
chr1	6150945	-	CG	1	11
chr1	6150950	+	CG	0.09319	279
chr1	6150951	-	CG	0.909091	11
chr1	6150966	+	CG	0.0526316	19
chr1	6150967	-	CG	0.833333	12
chr1	6150973	+	CG	0.263158	19
chr1	6150982	+	CG	0.842105	19
chr1	6151000	+	CG	0.857143	7
chr1	6151011	+	CG	0.461538	13
chr1	6151035	+	CG	0.833333	12
chr1	6151036	-	CG	0.963519	466
chr1	6151050	+	CG	0.833333	12
chr1	6151051	-	CG	0.982869	467
chr1	6151052	+	CG	0.916667	12
chr1	6151053	-	CG	0.972103	466
chr1	6151054	+	CG	0.833333	12
chr1	6151055	-	CG	0.965739	467
chr1	6151069	+	CG	0.976965	738
chr1	6151070	-	CG	0.963203	462
chr1	6151072	+	CG	0.921516	739
chr1	6151073	-	CG	1	23
chr1	6151132	+	CG	0.91689	746
chr1	6151133	-	CG	0.780488	41
chr1	6151149	+	CG	0.951807	747
chr1	6151150	-	CG	0.926829	41
chr1	6151166	-	CG	0.911111	45
chr1	6151182	-	CG	1	16
chr1	6151200	-	CG	0.9375	16
chr1	6163576	+	CG	0.981651	218
chr1	6163613	+	CG	0.866972	218
chr1	6163614	-	CG	0.878419	658
chr1	6163673	-	CG	0.940367	654
chr1	6173155	-	CG	1	11
chr1	6213415	+	CG	0.407407	27
chr1	6213520	-	CG	0.472727	275
chr1	6214311	+	CG	0.0634921	504
chr1	6214316	+	CG	0	506
chr1	6214317	-	CG	0.00359066	557
chr1	6214336	+	CG	0.00788955	507
chr1	6214337	-	CG	0.00716846	558
chr1	6214346	+	CG	0.00197239	507
chr1	6214347	-	CG	0.00716846	558
chr1	6214389	+	CG	0.00197628	506
chr1	6214390	-	CG	0.00361664	553
chr1	6214399	+	CG	0.0333333	180
chr1	6214400	-	CG	0.0745455	550
chr1	6214431	+	CG	0	180
chr1	6214432	-	CG	0	184
chr1	6214437	+	CG	0.00549451	182
chr1	6214438	-	CG	0	184
chr1	6214445	+	CG	0.010929	183
chr1	6214446	-	CG	0	184
chr1	6214545	+	CG	0	183
chr1	6214546	-	CG	0	181
chr1	6214549	+	CG	0.00546448	183
chr1	6214550	-	CG	0	182
chr1	6214552	+	CG	0.010929	183
chr1	6214553	-	CG	0.010929	183
chr1	6214556	+	CG	0.00549451	182
chr1	6214557	-	CG	0.00546448	183
chr1	6214561	+	CG	0.0164835	182
chr1	6214562	-	CG	0	183
chr1	6214563	+	CG	0.010989	182
[truncated: 1,046,576+ more rows]
