# Supplementary material for: Polyglutamine-expanded ataxin3 alter specific gene expressions through changing DNA methylation status in SCA3/MJD
Source: Aging (Albany NY). 2020 Dec 19;13(3):3680–98. doi: 10.18632/aging.202331 (PMC7906150; doi:10.18632/aging.202331)
Supplement: Supplementary Table 9 [file aging-13-202331-s005.xlsx]

## Sheet: Supplementary Table 9
Chr	position	strand	site	average methylation percent	reads
chr1	3014928	+	CG	1	12
chr1	3014974	+	CG	0.0833333	12
chr1	3015124	+	CG	1	7
chr1	3020814	+	CG	1	77
chr1	3020815	-	CG	1	6
chr1	3020842	+	CG	0.025641	78
chr1	3020843	-	CG	1	5
chr1	3020877	+	CG	0.961603	599
chr1	3020891	+	CG	0.898164	599
chr1	3020892	-	CG	0.872807	684
chr1	3020945	+	CG	0.80543	221
chr1	3020946	-	CG	0.842105	684
chr1	3020971	+	CG	0.778723	235
chr1	3020972	-	CG	0.761322	817
chr1	3020987	+	CG	0.948936	235
chr1	3020988	-	CG	0.95104	817
chr1	3021013	-	CG	0.980368	815
chr1	3037802	+	CG	0.907463	335
chr1	3037820	+	CG	0.804154	337
chr1	3037821	-	CG	0.840517	232
chr1	3037825	+	CG	0.95858	338
chr1	3037826	-	CG	0.948276	232
chr1	3037827	+	CG	0.825444	338
chr1	3037828	-	CG	0.840517	232
chr1	3037845	+	CG	0.934911	338
chr1	3037846	-	CG	0.952586	232
chr1	3037853	+	CG	1	7
chr1	3037854	-	CG	0.8	5
chr1	3037855	+	CG	1	7
chr1	3037856	-	CG	0.8	5
chr1	3037862	+	CG	1	7
chr1	3037863	-	CG	0.910256	78
chr1	3037869	+	CG	0.908012	337
chr1	3037870	-	CG	0.947368	304
chr1	3037911	-	CG	0.940972	288
chr1	3037915	-	CG	0.833333	6
chr1	3037938	-	CG	1	6
chr1	3037941	-	CG	0.833333	6
chr1	3037950	-	CG	1	6
chr1	3037995	-	CG	0.952381	21
chr1	3043661	+	CG	0.964286	28
chr1	3045088	+	CG	0.92	75
chr1	3045119	+	CG	0.930556	72
chr1	3045120	-	CG	0.906977	86
chr1	3045299	+	CG	0.944444	72
chr1	3045300	-	CG	0.942529	87
chr1	3045306	+	CG	0.8	75
chr1	3045307	-	CG	0.850575	87
chr1	3045313	-	CG	0.977011	87
chr1	3059400	+	CG	0.942857	35
chr1	3059415	+	CG	0.942857	35
chr1	3059416	-	CG	0.8	40
chr1	3059427	+	CG	0.942857	35
chr1	3059428	-	CG	0.875	40
chr1	3059436	+	CG	0.8	35
chr1	3059437	-	CG	0.775	40
chr1	3059575	-	CG	1	5
chr1	3059583	-	CG	1	5
chr1	3059590	+	CG	1	36
chr1	3059591	-	CG	0.971429	35
chr1	3059635	-	CG	0.942857	35
chr1	3087881	+	CG	1	6
chr1	3087906	+	CG	0.166667	6
chr1	3087907	-	CG	0.608696	115
chr1	3091454	-	CG	0.8	5
chr1	3093908	+	CG	0.967568	185
chr1	3094116	+	CG	0.740541	185
chr1	3094117	-	CG	0.75	24
chr1	3094122	-	CG	0.875	24
chr1	3099635	+	CG	0.984848	66
chr1	3099786	-	CG	0.953846	65
chr1	3112234	+	CG	0.882353	255
chr1	3112266	+	CG	0.730469	256
chr1	3112267	-	CG	0.746725	229
chr1	3112371	+	CG	0.92549	255
chr1	3112372	-	CG	0.942731	227
chr1	3112403	-	CG	0.915179	224
chr1	3136816	+	CG	1	10
chr1	3144715	+	CG	0.84507	71
chr1	3149930	+	CG	0.976879	519
chr1	3149938	+	CG	0.973077	520
chr1	3149939	-	CG	0.938462	65
chr1	3150008	+	CG	1	5
chr1	3150022	+	CG	0.946565	524
chr1	3150023	-	CG	0.640625	64
chr1	3150047	+	CG	0.965583	523
chr1	3150048	-	CG	0.403226	62
chr1	3150058	-	CG	0.951613	62
chr1	3180156	+	CG	0.953079	341
chr1	3276279	+	CG	1	8
chr1	3276294	+	CG	1	8
chr1	3276339	+	CG	1	8
chr1	3276343	+	CG	0	8
chr1	3301786	+	CG	0.966667	330
chr1	3301802	+	CG	0.978852	331
chr1	3301803	-	CG	0.975385	325
chr1	3301812	+	CG	0.963746	331
chr1	3301813	-	CG	0.966049	324
chr1	3301819	+	CG	0.975831	331
chr1	3301820	-	CG	0.97546	326
chr1	3301899	+	CG	0.960725	331
chr1	3301900	-	CG	0.978528	326
chr1	3301941	-	CG	0.92	325
chr1	3308551	+	CG	0.967033	91
chr1	3308702	-	CG	0.961538	78
chr1	3344649	+	CG	0.963855	249
chr1	3344724	+	CG	0.919874	1273
chr1	3344725	-	CG	0.88946	389
chr1	3344742	+	CG	0.940867	1522
chr1	3344743	-	CG	0.919173	532
chr1	3344762	+	CG	0.952005	1521
chr1	3344763	-	CG	0.969754	529
chr1	3344777	+	CG	0.421138	615
chr1	3344778	-	CG	0.958333	528
chr1	3344788	+	CG	0.932384	281
chr1	3344808	+	CG	0.953737	281
chr1	3344809	-	CG	0.947368	19
chr1	3344824	+	CG	0.957295	281
chr1	3344825	-	CG	0.818182	22
chr1	3344845	+	CG	0.967857	280
chr1	3344846	-	CG	0.785714	14
chr1	3344849	+	CG	0.942652	279
chr1	3344850	-	CG	1	14
chr1	3344863	+	CG	1	11
chr1	3344864	-	CG	0.923077	13
chr1	3344871	+	CG	1	11
chr1	3344911	+	CG	1	13
chr1	3344912	-	CG	0.727273	11
chr1	3344923	-	CG	0.818182	11
chr1	3419903	+	CG	0.935484	31
chr1	3419936	+	CG	0.7	30
chr1	3419937	-	CG	0.769231	52
chr1	3420054	-	CG	0.980392	51
chr1	3509745	+	CG	0.860215	93
chr1	3509850	+	CG	1	7
chr1	3509851	-	CG	0.948718	78
chr1	3531651	+	CG	0.983539	243
chr1	3531658	+	CG	0.983539	243
chr1	3531659	-	CG	0.965625	320
chr1	3531671	+	CG	0.979424	243
chr1	3531672	-	CG	0.940625	320
chr1	3531676	+	CG	0.983539	243
chr1	3531677	-	CG	0.95	320
chr1	3531680	+	CG	0.975309	243
chr1	3531681	-	CG	0.918495	319
chr1	3531686	+	CG	0.930041	243
chr1	3531687	-	CG	0.9279	319
chr1	3531690	+	CG	0.942387	243
chr1	3531691	-	CG	0.93125	320
chr1	3531692	+	CG	0.826446	242
chr1	3531693	-	CG	0.790625	320
chr1	3531694	+	CG	0.987654	243
chr1	3531695	-	CG	0.959375	320
chr1	3531760	+	CG	0.851852	243
chr1	3531761	-	CG	0.873418	316
chr1	3531764	+	CG	0.888889	243
chr1	3531765	-	CG	0.848101	316
chr1	3531770	+	CG	0.881148	244
chr1	3531771	-	CG	0.880503	318
chr1	3531778	+	CG	0.954918	244
chr1	3531779	-	CG	0.955836	317
chr1	3531785	-	CG	0.968454	317
chr1	3556763	+	CG	0.974359	78
chr1	3556775	+	CG	0.974359	78
chr1	3556776	-	CG	0.972222	72
chr1	3556782	+	CG	0.961538	78
chr1	3556783	-	CG	0.930556	72
chr1	3556786	+	CG	1	78
chr1	3556787	-	CG	0.930556	72
chr1	3556966	+	CG	1	79
chr1	3556967	-	CG	0.986486	74
chr1	3556986	+	CG	0.936709	79
chr1	3556987	-	CG	0.932432	74
chr1	3556998	-	CG	1	74
chr1	3614966	+	CG	1	7
chr1	3615084	-	CG	0.791667	24
chr1	3622136	+	CG	0.95102	490
chr1	3622216	+	CG	0.985743	491
chr1	3622217	-	CG	0.971284	592
chr1	3622256	+	CG	0.984472	644
chr1	3622257	-	CG	0.984797	592
chr1	3622310	+	CG	0.970451	643
chr1	3622311	-	CG	0.944444	738
chr1	3622340	+	CG	0.978417	139
chr1	3622341	-	CG	0.963215	734
chr1	3622504	+	CG	0.92029	138
chr1	3622505	-	CG	0.95614	114
chr1	3622513	+	CG	0.991453	117
chr1	3622514	-	CG	0.991228	114
chr1	3622545	-	CG	0.973684	114
chr1	3670645	+	CG	0.0515464	582
chr1	3670655	+	CG	0.00857633	583
chr1	3670656	-	CG	0.00417537	479
chr1	3670670	+	CG	0.0188679	583
chr1	3670671	-	CG	0.00626305	479
chr1	3670682	+	CG	0.00695652	575
chr1	3670683	-	CG	0.0083682	478
chr1	3670685	+	CG	0.00521739	575
chr1	3670686	-	CG	0.00416667	480
chr1	3670703	+	CG	0	11
chr1	3670722	+	CG	0.00856164	584
chr1	3670723	-	CG	0.010395	481
chr1	3670725	+	CG	0.00171233	584
chr1	3670726	-	CG	0.00831601	481
chr1	3670735	+	CG	0.00515464	582
chr1	3670736	-	CG	0.002079	481
chr1	3670742	+	CG	0.00515464	582
chr1	3670743	-	CG	0.00627615	478
chr1	3670752	-	CG	0.0584551	479
chr1	3671095	+	CG	0.0492813	487
chr1	3671099	+	CG	0.0161943	494
chr1	3671100	-	CG	0	702
chr1	3671102	+	CG	0.00808081	495
chr1	3671103	-	CG	0.0042735	702
chr1	3671105	+	CG	0.00201613	496
chr1	3671106	-	CG	0.002849	702
chr1	3671109	+	CG	0.00403226	496
chr1	3671110	-	CG	0.00854701	702
chr1	3671114	+	CG	0.0100806	496
chr1	3671115	-	CG	0.00284495	703
chr1	3671118	+	CG	0.00804829	497
chr1	3671119	-	CG	0.0142045	704
chr1	3671124	+	CG	0.00402414	497
chr1	3671125	-	CG	0.00283286	706
chr1	3671127	+	CG	0.0120724	497
chr1	3671128	-	CG	0.00141443	707
chr1	3671132	+	CG	0.0140845	497
chr1	3671133	-	CG	0.00565771	707
chr1	3671135	+	CG	0.00804829	497
chr1	3671136	-	CG	0.00430416	697
chr1	3671142	+	CG	0.00201207	497
chr1	3671143	-	CG	0.0042735	702
chr1	3671144	+	CG	0.00604839	496
chr1	3671145	-	CG	0	705
chr1	3671161	+	CG	0.0120968	496
chr1	3671162	-	CG	0.00283688	705
chr1	3671163	+	CG	0.00604839	496
chr1	3671164	-	CG	0.00566572	706
chr1	3671174	+	CG	0.0040568	493
chr1	3671175	-	CG	0.0042796	701
chr1	3671177	+	CG	0.010142	493
chr1	3671178	-	CG	0.00566572	706
chr1	3671182	-	CG	0.0753912	703
chr1	3671222	+	CG	0	54
chr1	3671229	+	CG	0	55
chr1	3671230	-	CG	0.00534759	187
chr1	3671232	+	CG	0	55
chr1	3671233	-	CG	0.0213904	187
chr1	3671265	+	CG	0	56
chr1	3671266	-	CG	0	187
chr1	3671413	+	CG	0.0181818	55
chr1	3671414	-	CG	0.00537634	186
chr1	3671424	+	CG	0.0181818	55
chr1	3671425	-	CG	0	186
chr1	3671429	+	CG	0.0181818	55
chr1	3671430	-	CG	0.0106952	187
chr1	3671447	+	CG	0.0633397	521
chr1	3671448	-	CG	0.0274725	182
chr1	3671451	+	CG	0.0114943	522
chr1	3671452	-	CG	0.00143062	699
chr1	3671453	+	CG	0.0115607	519
chr1	3671454	-	CG	0.00143062	699
chr1	3671456	+	CG	0.0114943	522
chr1	3671457	-	CG	0.00715308	699
chr1	3671478	+	CG	0.00380952	525
chr1	3671479	-	CG	0.00578035	692
chr1	3671482	+	CG	0.00189753	527
chr1	3671483	-	CG	0.00431034	696
chr1	3671486	+	CG	0.0113852	527
chr1	3671487	-	CG	0.00431034	696
chr1	3671490	+	CG	0.0056926	527
chr1	3671491	-	CG	0.0100143	699
chr1	3671493	+	CG	0.0132827	527
chr1	3671494	-	CG	0.00859599	698
chr1	3671496	+	CG	0.00759013	527
chr1	3671497	-	CG	0.00431655	695
chr1	3671500	+	CG	0.0113852	527
chr1	3671501	-	CG	0.00428571	700
chr1	3671502	+	CG	0.00759013	527
chr1	3671503	-	CG	0.00713267	701
chr1	3671512	+	CG	0.00379507	527
chr1	3671513	-	CG	0.00570613	701
chr1	3671521	+	CG	0.0840065	619
chr1	3671522	-	CG	0.0731707	697
chr1	3671529	+	CG	0.00484653	619
chr1	3671530	-	CG	0.00841751	594
chr1	3671533	+	CG	0.00484653	619
chr1	3671534	-	CG	0.00503356	596
chr1	3671537	+	CG	0.00484653	619
chr1	3671538	-	CG	0.0033557	596
chr1	3671544	+	CG	0.00161551	619
chr1	3671545	-	CG	0	596
chr1	3671552	+	CG	0.00162866	614
chr1	3671553	-	CG	0.00507614	591
chr1	3671555	+	CG	0.00969305	619
chr1	3671556	-	CG	0.00505051	594
chr1	3671569	+	CG	0.00323625	618
chr1	3671570	-	CG	0.00673401	594
chr1	3671572	+	CG	0.00485437	618
chr1	3671573	-	CG	0.00503356	596
chr1	3671586	+	CG	0.00488599	614
chr1	3671587	-	CG	0.00168634	593
chr1	3671588	+	CG	0.00325733	614
chr1	3671589	-	CG	0.010118	593
chr1	3671592	-	CG	0.0675676	592
chr1	3671636	+	CG	0	37
chr1	3671637	-	CG	0	5
chr1	3671642	+	CG	0	37
chr1	3671643	-	CG	0	201
chr1	3671644	+	CG	0	37
chr1	3671645	-	CG	0	199
chr1	3671655	+	CG	0	37
chr1	3671656	-	CG	0	201
chr1	3671660	+	CG	0	37
chr1	3671661	-	CG	0.00497512	201
chr1	3671663	+	CG	0	36
chr1	3671664	-	CG	0.00497512	201
chr1	3671666	+	CG	0.027027	37
chr1	3671667	-	CG	0	201
chr1	3671669	+	CG	0	37
chr1	3671670	-	CG	0	201
chr1	3671821	+	CG	0	37
chr1	3671822	-	CG	0.0049505	202
chr1	3671824	+	CG	0	37
chr1	3671825	-	CG	0.00497512	201
chr1	3671836	-	CG	0.0447761	201
chr1	3671863	+	CG	0	5
chr1	3671890	+	CG	0	5
chr1	3671893	+	CG	0	5
chr1	3672108	+	CG	0	5
chr1	3672117	+	CG	0	5
chr1	3673266	+	CG	1	24
chr1	3673316	+	CG	1	24
chr1	3673320	+	CG	0	24
chr1	3691491	+	CG	0.922705	207
chr1	3691616	+	CG	0.804878	205
chr1	3691617	-	CG	0.806533	398
chr1	3691644	-	CG	0.926768	396
chr1	3733331	-	CG	0.8125	32
chr1	3734928	+	CG	0.850746	134
chr1	3734953	+	CG	0.955882	136
chr1	3734954	-	CG	0.983193	119
chr1	3734955	+	CG	1	136
chr1	3734956	-	CG	0.957983	119
chr1	3735137	-	CG	0.966102	118
chr1	3740675	+	CG	0.962617	107
chr1	3740826	-	CG	0.957831	332
chr1	3746770	+	CG	0.912541	606
chr1	3746874	-	CG	0.990148	203
chr1	3766236	+	CG	0.911765	34
chr1	3766282	+	CG	0.96748	123
chr1	3766433	-	CG	0.964516	310
chr1	3772073	+	CG	0.952381	21
chr1	3772096	+	CG	0.857143	21
chr1	3772097	-	CG	0.826087	23
chr1	3772101	+	CG	0.190476	21
chr1	3772102	-	CG	0	23
chr1	3772105	+	CG	0.952381	21
chr1	3772106	-	CG	1	23
chr1	3772137	-	CG	1	23
chr1	3803659	+	CG	1	9
chr1	3803694	+	CG	1	9
chr1	3803770	+	CG	1	10
chr1	3803774	+	CG	1	10
chr1	3803783	+	CG	1	10
chr1	3805582	+	CG	0.969231	65
chr1	3805733	-	CG	0.941176	34
chr1	3811902	+	CG	0.969325	163
chr1	3811939	+	CG	0.723926	163
chr1	3811940	-	CG	0.752688	93
chr1	3812114	-	CG	0.865169	89
chr1	3824295	+	CG	0.977011	174
chr1	3824446	-	CG	1	10
chr1	3831146	+	CG	0.917241	145
chr1	3831150	+	CG	0.972414	145
chr1	3831151	-	CG	0.979167	48
chr1	3831332	-	CG	0.9375	48
chr1	3847102	+	CG	0.969697	99
chr1	3847253	-	CG	0.982143	112
chr1	3847814	+	CG	0.833333	6
chr1	3852402	+	CG	0.937304	319
chr1	3852417	+	CG	0.85625	320
chr1	3852418	-	CG	0.901869	214
chr1	3852516	-	CG	1	5
chr1	3852541	+	CG	0.95	320
chr1	3852542	-	CG	0.967442	215
chr1	3852544	+	CG	0.978125	320
chr1	3852545	-	CG	0.976744	215
chr1	3852567	-	CG	0.943662	213
chr1	3852606	+	CG	0.954683	331
chr1	3852630	+	CG	0.786787	333
chr1	3852631	-	CG	0.772242	281
chr1	3852753	+	CG	0.949102	334
chr1	3852754	-	CG	0.967972	281
chr1	3852779	-	CG	0.982079	279
chr1	3852818	+	CG	0.983838	495
chr1	3852819	-	CG	0.0526316	19
chr1	3852948	-	CG	0.743363	226
chr1	3853068	-	CG	0.894737	19
chr1	3853087	-	CG	0.0526316	19
chr1	3858676	+	CG	0.875	16
chr1	3878095	+	CG	0.932258	310
chr1	3878228	-	CG	0.910053	378
chr1	3892177	+	CG	0.897849	558
chr1	3892197	+	CG	0.647059	561
chr1	3892198	-	CG	0.596386	332
chr1	3892311	-	CG	0.795107	327
chr1	3896433	+	CG	0.987952	83
chr1	3896584	-	CG	0.976608	171
chr1	3905016	+	CG	1	6
chr1	3905033	+	CG	0.833333	6
chr1	3905034	-	CG	1	7
chr1	3905083	+	CG	1	6
chr1	3905084	-	CG	1	7
chr1	3921889	+	CG	1	14
chr1	3934417	+	CG	0.950066	761
chr1	3934477	+	CG	0.897368	760
chr1	3934478	-	CG	0.833333	18
chr1	3934514	+	CG	0.948886	763
chr1	3934515	-	CG	0.944444	18
chr1	3934521	-	CG	0.944444	18
chr1	3965737	+	CG	0.55102	392
chr1	3965842	-	CG	0.96988	498
chr1	3977485	+	CG	0.855556	90
chr1	3977521	+	CG	0.891304	92
chr1	3977522	-	CG	0.8	20
chr1	3977723	-	CG	0.894737	19
chr1	3987877	+	CG	0.987234	235
chr1	3987919	+	CG	0.90678	236
chr1	3987920	-	CG	0.898477	197
chr1	3987926	+	CG	0.932203	236
chr1	3987927	-	CG	0.949239	197
chr1	3987943	+	CG	0.940678	236
chr1	3987944	-	CG	0.913706	197
chr1	3987945	+	CG	0.957627	236
chr1	3987946	-	CG	0.923858	197
chr1	3987953	-	CG	0.969543	197
chr1	4004784	+	CG	0.981308	107
chr1	4004990	-	CG	0.840909	132
chr1	4022241	+	CG	0.979058	191
chr1	4022392	-	CG	0.947598	229
chr1	4059218	+	CG	0.939394	99
chr1	4059264	+	CG	0.89899	99
chr1	4059265	-	CG	0.909091	99
chr1	4059433	-	CG	0.755102	98
chr1	4079516	+	CG	1	11
chr1	4085284	-	CG	0.890909	220
chr1	4085301	-	CG	0.917808	219
chr1	4085381	-	CG	0.95	20
chr1	4085415	+	CG	0.9	20
chr1	4085416	-	CG	1	20
chr1	4085422	+	CG	0.95	20
chr1	4085423	-	CG	0.851852	27
chr1	4085429	+	CG	0.95	20
chr1	4085430	-	CG	0.962963	27
chr1	4085434	+	CG	0.85	20
chr1	4085435	-	CG	0.925926	27
chr1	4085438	+	CG	0.95	20
chr1	4085439	-	CG	0.925926	27
chr1	4085468	-	CG	0.961538	26
chr1	4085588	+	CG	1	5
chr1	4085589	-	CG	0.912371	194
chr1	4085623	+	CG	1	8
chr1	4085624	-	CG	0.984293	191
chr1	4085630	+	CG	0.866667	30
chr1	4085631	-	CG	0.888889	9
chr1	4085637	+	CG	0.933333	30
chr1	4085638	-	CG	0.777778	9
chr1	4085642	+	CG	0.933333	30
chr1	4085643	-	CG	1	9
chr1	4085646	+	CG	0.933333	30
chr1	4085647	-	CG	0.888889	9
chr1	4085676	-	CG	0.75	8
chr1	4103065	+	CG	0.875	8
chr1	4103089	+	CG	0.1	10
chr1	4106410	+	CG	0.934457	534
chr1	4106516	-	CG	0.730263	456
chr1	4161630	+	CG	0.970732	205
chr1	4161807	-	CG	0.959596	99
chr1	4187674	+	CG	0.981395	215
chr1	4187683	+	CG	0.967593	216
chr1	4187684	-	CG	0.874494	247
chr1	4187706	+	CG	0.99537	216
chr1	4187707	-	CG	0.968	250
chr1	4187712	+	CG	0.976959	217
chr1	4187713	-	CG	0.963855	249
chr1	4187801	+	CG	0.976959	217
chr1	4187802	-	CG	0.959514	247
chr1	4187803	+	CG	0.880184	217
chr1	4187804	-	CG	0.894737	247
chr1	4187820	+	CG	0.976852	216
chr1	4187821	-	CG	0.97166	247
chr1	4187845	-	CG	0.91498	247
chr1	4187889	+	CG	0.942721	419
chr1	4187911	+	CG	0.899761	419
chr1	4187912	-	CG	0.868012	644
chr1	4187922	+	CG	0.918854	419
chr1	4187923	-	CG	0.874419	645
chr1	4187998	-	CG	0.927581	649
chr1	4193621	-	CG	0.952381	42
chr1	4193667	-	CG	0.571429	7
chr1	4193700	-	CG	1	6
chr1	4193859	-	CG	1	6
chr1	4212930	+	CG	0.952096	167
chr1	4213081	-	CG	1	8
chr1	4219858	-	CG	0.00892857	112
chr1	4219920	-	CG	0.675926	108
chr1	4235785	-	CG	0.933333	15
chr1	4235866	-	CG	0.0666667	15
chr1	4247982	+	CG	0.984456	193
chr1	4248093	+	CG	0.917098	193
chr1	4248094	-	CG	0.907801	141
chr1	4248133	-	CG	0.956835	139
chr1	4255120	+	CG	0.238095	21
chr1	4259068	+	CG	1	7
chr1	4259110	+	CG	0.857143	7
chr1	4259111	-	CG	0.555556	9
chr1	4259339	-	CG	1	8
chr1	4260279	+	CG	0.930435	115
chr1	4260490	-	CG	0.579787	188
chr1	4277819	+	CG	1	5
chr1	4280077	-	CG	0	7
chr1	4280140	-	CG	0	7
chr1	4305956	+	CG	0.952381	105
chr1	4306106	-	CG	0.941704	223
chr1	4341097	-	CG	0.986014	143
chr1	4376337	+	CG	1	5
chr1	4376367	+	CG	1	5
chr1	4376368	-	CG	0.777778	27
chr1	4376595	-	CG	0.965517	29
chr1	4440438	+	CG	0.974545	275
chr1	4440586	+	CG	0.807971	276
chr1	4440587	-	CG	0.737052	251
chr1	4440611	+	CG	0.886447	273
chr1	4440612	-	CG	0.831325	249
chr1	4440616	-	CG	0.778226	248
chr1	4486603	+	CG	0.978417	139
chr1	4486754	-	CG	0.982558	172
chr1	4491970	+	CG	0.0367647	272
chr1	4491976	+	CG	0.0109489	274
chr1	4491977	-	CG	0.00840336	238
chr1	4491980	+	CG	0.0109489	274
chr1	4491981	-	CG	0.012605	238
chr1	4491998	+	CG	0.00363636	275
chr1	4491999	-	CG	0.012605	238
chr1	4492004	+	CG	0.00738007	271
chr1	4492005	-	CG	0.012605	238
chr1	4492007	+	CG	0.0147059	272
chr1	4492008	-	CG	0.00840336	238
chr1	4492010	+	CG	0.0075188	266
chr1	4492011	-	CG	0.0210084	238
chr1	4492085	+	CG	0.0109489	274
chr1	4492086	-	CG	0.00854701	234
chr1	4492087	+	CG	0.00364964	274
chr1	4492088	-	CG	0.00425532	235
chr1	4492090	+	CG	0.0109489	274
chr1	4492091	-	CG	0.0210084	238
chr1	4492108	+	CG	0.00364964	274
chr1	4492109	-	CG	0.00425532	235
chr1	4492118	+	CG	0.00364964	274
chr1	4492119	-	CG	0.00425532	235
chr1	4492131	-	CG	0.0466102	236
chr1	4492154	+	CG	0.0821705	645
chr1	4492164	+	CG	0.00771605	648
chr1	4492165	-	CG	0.004329	462
chr1	4492177	+	CG	0.00462963	648
chr1	4492178	-	CG	0.00865801	462
chr1	4492181	+	CG	0.00938967	639
chr1	4492182	-	CG	0.00434783	460
chr1	4492189	+	CG	0.0123267	649
chr1	4492190	-	CG	0.0151515	462
chr1	4492205	+	CG	0.0123648	647
chr1	4492206	-	CG	0.00865801	462
chr1	4492216	+	CG	0.0217054	645
chr1	4492217	-	CG	0.017316	462
chr1	4492232	-	CG	0.0722101	457
chr1	4492310	+	CG	0.0633803	568
chr1	4492330	+	CG	0.0140598	569
chr1	4492331	-	CG	0	411
chr1	4492333	+	CG	0.0105448	569
chr1	4492334	-	CG	0	412
chr1	4492337	+	CG	0.00352113	568
chr1	4492338	-	CG	0.00970874	412
chr1	4492339	+	CG	0.00176056	568
chr1	4492340	-	CG	0.0121359	412
chr1	4492345	+	CG	0.00176367	567
chr1	4492346	-	CG	0.00486618	411
chr1	4492365	+	CG	0	572
chr1	4492366	-	CG	0.00485437	412
chr1	4492385	+	CG	0.00527241	569
chr1	4492386	-	CG	0.0145985	411
chr1	4492397	+	CG	0.0123023	569
chr1	4492398	-	CG	0.0218978	411
chr1	4492405	+	CG	0	8
chr1	4492406	-	CG	0.0806846	409
chr1	4492418	+	CG	0	8
chr1	4492424	+	CG	0.0840065	619
chr1	4492456	+	CG	0.00321543	622
chr1	4492457	-	CG	0.00528169	568
chr1	4492458	+	CG	0.0112903	620
chr1	4492459	-	CG	0.0123023	569
chr1	4492462	+	CG	0.011254	622
chr1	4492463	-	CG	0.00711744	562
chr1	4492468	+	CG	0.00482315	622
chr1	4492469	-	CG	0.00880282	568
chr1	4492478	+	CG	0.00803859	622
chr1	4492479	-	CG	0.0123023	569
chr1	4492480	+	CG	0.00483092	621
chr1	4492481	-	CG	0.0158172	569
chr1	4492483	+	CG	0.0607595	395
chr1	4492484	-	CG	0.0687831	567
chr1	4492495	+	CG	0.00493827	405
chr1	4492496	-	CG	0.00419287	477
chr1	4492498	+	CG	0.00493827	405
chr1	4492499	-	CG	0.00838574	477
chr1	4492504	+	CG	0.0148883	403
chr1	4492505	-	CG	0.0146751	477
chr1	4492527	+	CG	0.0197044	406
chr1	4492528	-	CG	0.0104822	477
chr1	4492536	+	CG	0.00492611	406
chr1	4492537	-	CG	0.00627615	478
chr1	4492551	+	CG	0.00987654	405
chr1	4492552	-	CG	0.0105485	474
chr1	4492554	+	CG	0	405
chr1	4492555	-	CG	0.012605	476
chr1	4492557	+	CG	0.0123762	404
chr1	4492558	-	CG	0.00210084	476
chr1	4492559	+	CG	0.0123457	405
chr1	4492560	-	CG	0.012605	476
chr1	4492563	+	CG	0.0515873	252
chr1	4492564	-	CG	0.0868644	472
chr1	4492600	+	CG	0.015873	252
chr1	4492601	-	CG	0.0107527	186
chr1	4492602	+	CG	0.015873	252
chr1	4492603	-	CG	0.00537634	186
chr1	4492608	+	CG	0.0118577	253
chr1	4492609	-	CG	0.0322581	186
chr1	4492690	+	CG	0.0118577	253
chr1	4492691	-	CG	0.00540541	185
chr1	4492692	+	CG	0.00790514	253
chr1	4492693	-	CG	0.0162162	185
chr1	4492704	+	CG	0.00790514	253
chr1	4492705	-	CG	0.0108108	185
chr1	4492715	+	CG	0.0782779	511
chr1	4492716	-	CG	0.076087	184
chr1	4492754	+	CG	0.00785855	509
chr1	4492755	-	CG	0.00585652	683
chr1	4492772	-	CG	0.0899705	678
chr1	4493069	+	CG	0.0483092	207
chr1	4493092	+	CG	0.0047619	210
chr1	4493093	-	CG	0.00268817	372
chr1	4493121	+	CG	0	5
chr1	4493154	-	CG	0	6
chr1	4493159	+	CG	0.00961538	208
chr1	4493160	-	CG	0.00533333	375
chr1	4493163	+	CG	0.0240385	208
chr1	4493164	-	CG	0.013369	374
chr1	4493187	+	CG	0.0194175	206
chr1	4493188	-	CG	0.00539084	371
chr1	4493194	+	CG	0.00485437	206
chr1	4493195	-	CG	0.0134771	371
chr1	4493198	+	CG	0.0145631	206
chr1	4493199	-	CG	0.0188679	371
chr1	4493202	-	CG	0.0540541	370
chr1	4493238	+	CG	0.0650407	246
chr1	4493245	+	CG	0.0120968	248
chr1	4493246	-	CG	0.00536673	559
chr1	4493250	+	CG	0.0120968	248
chr1	4493251	-	CG	0.0143113	559
chr1	4493257	+	CG	0.00806452	248
chr1	4493258	-	CG	0.00716846	558
chr1	4493268	+	CG	0.00403226	248
chr1	4493269	-	CG	0.00894454	559
chr1	4493341	+	CG	0.00403226	248
chr1	4493342	-	CG	0.00358423	558
chr1	4493343	+	CG	0.00403226	248
chr1	4493344	-	CG	0.00715564	559
chr1	4493350	+	CG	0.0201613	248
chr1	4493351	-	CG	0.00715564	559
chr1	4493352	+	CG	0.00403226	248
chr1	4493353	-	CG	0.00715564	559
chr1	4493358	-	CG	0.0376344	558
chr1	4493395	+	CG	0.010989	91
chr1	4493419	+	CG	0.032967	91
chr1	4493420	-	CG	0	138
chr1	4493425	+	CG	0.0111111	90
chr1	4493426	-	CG	0.00719424	139
chr1	4493444	-	CG	0	5
chr1	4493451	-	CG	0	5
chr1	4493454	-	CG	0	5
chr1	4493576	+	CG	0.010989	91
chr1	4493577	-	CG	0.00735294	136
chr1	4493578	+	CG	0.010989	91
chr1	4493579	-	CG	0.00735294	136
chr1	4493604	+	CG	0.032967	91
chr1	4493605	-	CG	0.0222222	135
chr1	4493616	+	CG	0.116162	396
chr1	4493617	-	CG	0.0441176	136
chr1	4493621	+	CG	0.00755668	397
chr1	4493622	-	CG	0.00198807	503
chr1	4493623	+	CG	0.0176322	397
chr1	4493624	-	CG	0.00397614	503
chr1	4493644	+	CG	0.00757576	396
chr1	4493645	-	CG	0.00199601	501
chr1	4493646	+	CG	0.00263158	380
chr1	4493647	-	CG	0.00795229	503
chr1	4493656	+	CG	0.012945	309
chr1	4493657	-	CG	0.00994036	503
chr1	4493661	+	CG	0.0359712	278
chr1	4493662	-	CG	0.0159046	503
chr1	4493667	+	CG	0.0176322	397
chr1	4493668	-	CG	0.0178926	503
chr1	4493672	+	CG	0.0794702	151
chr1	4493673	-	CG	0.064257	498
chr1	4493694	+	CG	0.00657895	152
chr1	4493695	-	CG	0.00724638	552
chr1	4493710	+	CG	0.00657895	152
chr1	4493711	-	CG	0.00543478	552
chr1	4493730	+	CG	0.0328947	152
chr1	4493731	-	CG	0.00735294	544
chr1	4493749	-	CG	0.105455	550
chr1	4496988	+	CG	0.0794979	478
chr1	4496991	+	CG	0.0228216	482
chr1	4496992	-	CG	0.0160428	561
chr1	4497028	+	CG	0.0103734	482
chr1	4497029	-	CG	0.019469	565
chr1	4497040	+	CG	0.0103306	484
chr1	4497041	-	CG	0.0159292	565
chr1	4497069	+	CG	0.0269151	483
chr1	4497070	-	CG	0.0176991	565
chr1	4497073	+	CG	0.00831601	481
chr1	4497074	-	CG	0.0353982	565
chr1	4497076	+	CG	0.0123967	484
chr1	4497077	-	CG	0.0106762	562
chr1	4497083	+	CG	0.0781032	717
chr1	4497084	-	CG	0.0732143	560
chr1	4497090	+	CG	0.0262794	723
chr1	4497091	-	CG	0.0248139	806
chr1	4497111	+	CG	0.02213	723
chr1	4497112	-	CG	0.0136816	804
chr1	4497118	+	CG	0.0223776	715
chr1	4497119	-	CG	0.0124069	806
chr1	4497123	+	CG	0.0222531	719
chr1	4497124	-	CG	0.028536	806
chr1	4497127	+	CG	0.0138313	723
chr1	4497128	-	CG	0.0186104	806
chr1	4497145	+	CG	0.080292	137
chr1	4497146	-	CG	0.0932836	804
chr1	4497159	+	CG	0.0510949	137
chr1	4497160	-	CG	0.0503597	139
chr1	4497187	+	CG	0.0144928	138
chr1	4497188	-	CG	0.0214286	140
chr1	4497189	+	CG	0.016	125
chr1	4497190	-	CG	0.00714286	140
chr1	4497244	+	CG	0.00719424	139
chr1	4497245	-	CG	0.0144928	138
chr1	4497288	-	CG	0.0729927	137
chr1	4523484	+	CG	0.977459	488
chr1	4523573	-	CG	0.899441	716
chr1	4529461	+	CG	1	6
chr1	4529612	-	CG	0.943396	106
chr1	4553704	+	CG	0.931944	720
chr1	4553746	+	CG	0.954357	723
chr1	4553747	-	CG	0.962838	592
chr1	4553752	+	CG	0.976454	722
chr1	4553753	-	CG	0.974662	592
chr1	4553779	-	CG	0.939086	591
chr1	4559683	-	CG	0.375	8
chr1	4559686	+	CG	0.948827	469
chr1	4559687	-	CG	0	8
chr1	4559698	+	CG	0.891489	470
chr1	4559699	-	CG	0.933333	15
chr1	4559719	+	CG	0.818376	468
chr1	4559720	-	CG	0.75	12
chr1	4559723	+	CG	0.976546	469
chr1	4559724	-	CG	1	12
chr1	4559736	+	CG	0.972145	718
chr1	4559737	-	CG	1	5
chr1	4559746	+	CG	0.938889	720
chr1	4559747	-	CG	0.962963	351
chr1	4559784	-	CG	0.928775	351
chr1	4559814	+	CG	1	14
chr1	4559815	-	CG	0.957576	165
chr1	4559828	+	CG	0.857143	14
chr1	4559829	-	CG	0.69697	165
chr1	4559854	-	CG	0.957576	165
chr1	4559898	+	CG	0.9	10
chr1	4559910	+	CG	1	10
chr1	4559911	-	CG	0.923077	13
chr1	4559931	+	CG	0.5	10
chr1	4559932	-	CG	0.846154	13
chr1	4559935	+	CG	1	10
chr1	4559936	-	CG	0.923077	13
chr1	4559948	+	CG	1	29
chr1	4559949	-	CG	1	9
chr1	4559955	+	CG	0.724138	29
chr1	4559956	-	CG	1	12
chr1	4559958	+	CG	0.965517	29
chr1	4559959	-	CG	0.916667	12
chr1	4559996	-	CG	0.833333	12
chr1	4560066	-	CG	0.920635	189
chr1	4560076	-	CG	0.285714	7
chr1	4560087	-	CG	0.8	5
chr1	4560123	-	CG	1	6
chr1	4560144	-	CG	0.833333	6
chr1	4560148	-	CG	1	6
chr1	4560160	+	CG	0.973154	298
chr1	4560170	+	CG	0.963087	298
chr1	4560171	-	CG	0.977961	363
chr1	4560208	-	CG	0.909091	363
chr1	4560238	+	CG	1	61
chr1	4560239	-	CG	0.944625	307
chr1	4560252	+	CG	0.806452	62
chr1	4560253	-	CG	0.693811	307
chr1	4560278	-	CG	0.960656	305
chr1	4560322	+	CG	1	30
chr1	4560334	+	CG	0.9	30
chr1	4560355	+	CG	0.933333	30
chr1	4560359	+	CG	0.9	30
chr1	4560372	+	CG	0.978571	140
chr1	4560379	+	CG	0.928571	140
chr1	4560382	+	CG	0.985816	141
chr1	4560490	-	CG	0.831169	77
chr1	4560500	-	CG	0.444444	9
chr1	4560511	-	CG	1	5
chr1	4560534	+	CG	1	8
chr1	4560546	+	CG	0.875	8
chr1	4560567	+	CG	1	7
chr1	4560571	+	CG	1	7
chr1	4560584	+	CG	0.963504	137
chr1	4560591	+	CG	0.927536	138
chr1	4560592	-	CG	0.888889	27
chr1	4560594	+	CG	0.992754	138
chr1	4560595	-	CG	0.925926	27
chr1	4560632	-	CG	0.888889	27
chr1	4560676	+	CG	0.814607	178
chr1	4560694	+	CG	0.0280899	178
chr1	4560746	+	CG	1	10
chr1	4560758	+	CG	0.9	10
chr1	4560779	+	CG	0.8	10
chr1	4560783	+	CG	0.9	10
chr1	4560796	+	CG	1	11
chr1	4560803	+	CG	1	11
chr1	4560806	+	CG	1	11
chr1	4560888	+	CG	0.838323	167
chr1	4560889	-	CG	0.888889	27
chr1	4560914	-	CG	0.888889	27
chr1	4560958	+	CG	0.967213	61
chr1	4560970	+	CG	0.95082	61
chr1	4560991	+	CG	0.901639	61
chr1	4560995	+	CG	0.95082	61
chr1	4571618	+	CG	0.0248227	282
chr1	4571642	+	CG	0	282
chr1	4571643	-	CG	0.0143885	139
chr1	4571647	+	CG	0.0142349	281
chr1	4571648	-	CG	0.0143885	139
chr1	4571655	+	CG	0.0035461	282
chr1	4571656	-	CG	0	139
chr1	4571757	+	CG	0.0106383	282
chr1	4571758	-	CG	0.00735294	136
chr1	4571759	+	CG	0.00711744	281
chr1	4571760	-	CG	0	138
chr1	4571771	+	CG	0.0106762	281
chr1	4571772	-	CG	0	138
chr1	4571773	+	CG	0.00711744	281
chr1	4571774	-	CG	0.00724638	138
chr1	4571782	+	CG	0.00355872	281
chr1	4571783	-	CG	0	138
chr1	4571804	-	CG	0.0437956	137
chr1	4571827	+	CG	0.0676259	695
chr1	4571832	+	CG	0.00573066	698
chr1	4571833	-	CG	0.00153846	650
chr1	4571834	+	CG	0.00286944	697
chr1	4571835	-	CG	0.00769231	650
chr1	4571840	+	CG	0.0028777	695
chr1	4571841	-	CG	0.0030722	651
chr1	4571843	+	CG	0	698
chr1	4571844	-	CG	0.00614439	651
chr1	4571858	+	CG	0.0071736	697
chr1	4571859	-	CG	0.00768049	651
chr1	4571883	+	CG	0.0731707	246
chr1	4571884	-	CG	0.0771605	648
chr1	4571890	+	CG	0.00404858	247
chr1	4571891	-	CG	0.00184502	542
chr1	4571892	+	CG	0.00404858	247
chr1	4571893	-	CG	0.00369004	542
chr1	4571894	+	CG	0.00404858	247
chr1	4571895	-	CG	0.00184502	542
chr1	4571904	+	CG	0	248
chr1	4571905	-	CG	0.00738007	542
chr1	4571914	+	CG	0	248
chr1	4571915	-	CG	0.00369004	542
chr1	4571924	+	CG	0	248
chr1	4571925	-	CG	0.00922509	542
chr1	4571944	+	CG	0.0385321	545
chr1	4571945	-	CG	0.116667	540
chr1	4571950	+	CG	0.00919118	544
chr1	4571951	-	CG	0.00274725	728
chr1	4571952	+	CG	0.00366972	545
chr1	4571953	-	CG	0.00550206	727
chr1	4571958	+	CG	0.00733945	545
chr1	4571959	-	CG	0.00274348	729
chr1	4571970	+	CG	0.00733945	545
chr1	4571971	-	CG	0.00137174	729
chr1	4572000	+	CG	0.00366972	545
chr1	4572001	-	CG	0.00411523	729
chr1	4572016	+	CG	0.00183824	544
chr1	4572017	-	CG	0.00274348	729
chr1	4572023	+	CG	0.00919118	544
chr1	4572024	-	CG	0.00413793	725
chr1	4572032	-	CG	0.0622407	723
chr1	4590553	+	CG	0.97861	187
chr1	4590700	-	CG	0.959016	244
chr1	4607756	+	CG	0.961538	182
chr1	4607876	+	CG	0.0222222	180
chr1	4607877	-	CG	0.94	50
chr1	4607907	-	CG	0.96	50
chr1	4607986	-	CG	1	6
chr1	4688280	+	CG	0.97249	727
chr1	4688310	+	CG	0.950617	729
chr1	4688311	-	CG	0.968254	945
chr1	4688319	+	CG	0.975309	729
chr1	4688320	-	CG	0.979915	946
chr1	4688330	+	CG	0.976648	728
chr1	4688331	-	CG	0.97037	945
chr1	4688345	+	CG	0.965612	727
chr1	4688346	-	CG	0.980973	946
chr1	4688348	+	CG	0.943604	727
chr1	4688349	-	CG	0.971459	946
chr1	4688352	-	CG	0.978814	944
chr1	4695296	+	CG	0.833333	6
chr1	4708825	+	CG	0.959184	294
chr1	4708931	-	CG	0.916667	24
chr1	4709264	+	CG	1	25
chr1	4727357	+	CG	0.947368	57
chr1	4727508	-	CG	1	74
chr1	4760740	+	CG	0.916667	12
chr1	4760955	+	CG	0.833333	12
chr1	4760980	+	CG	1	12
chr1	4763311	+	CG	0.9	10
chr1	4763430	+	CG	1	8
chr1	4763431	-	CG	1	12
chr1	4763691	-	CG	0.947368	38
chr1	4788662	+	CG	0.991304	115
chr1	4788665	+	CG	0.982609	115
chr1	4788666	-	CG	0.972222	252
chr1	4788680	+	CG	0.973913	115
chr1	4788681	-	CG	0.93254	252
chr1	4788822	+	CG	0.93913	115
chr1	4788823	-	CG	0.980159	252
chr1	4788833	-	CG	0.984127	252
chr1	4800164	+	CG	1	30
chr1	4800169	+	CG	0.966667	30
chr1	4800170	-	CG	0.910448	67
chr1	4800195	+	CG	0.966667	30
chr1	4800196	-	CG	0.955224	67
chr1	4800202	+	CG	0.933333	30
chr1	4800203	-	CG	0.940299	67
chr1	4800208	+	CG	0.9	30
chr1	4800209	-	CG	0.910448	67
chr1	4800393	-	CG	0.985075	67
chr1	4807908	+	CG	0.101852	324
chr1	4807919	+	CG	0.00308642	324
chr1	4807920	-	CG	0.0100671	298
chr1	4807934	+	CG	0.00308642	324
chr1	4807935	-	CG	0	295
chr1	4807939	+	CG	0.00308642	324
chr1	4807940	-	CG	0.0033557	298
chr1	4807946	+	CG	0.00308642	324
chr1	4807947	-	CG	0	298
chr1	4807949	+	CG	0.00308642	324
chr1	4807950	-	CG	0.0033557	298
chr1	4807958	-	CG	0.0939597	298
chr1	4807998	+	CG	0.0635155	677
chr1	4808015	+	CG	0.00435414	689
chr1	4808016	-	CG	0.00511509	782
chr1	4808027	+	CG	0.0115942	690
chr1	4808028	-	CG	0.00516129	775
chr1	4808030	+	CG	0.0115942	690
chr1	4808031	-	CG	0.00511509	782
chr1	4808032	+	CG	0.00580552	689
chr1	4808033	-	CG	0.00255754	782
chr1	4808034	+	CG	0.00434783	690
chr1	4808035	-	CG	0.00511509	782
chr1	4808042	+	CG	0	687
chr1	4808043	-	CG	0.00383632	782
chr1	4808046	+	CG	0.00434783	690
chr1	4808047	-	CG	0.00127877	782
chr1	4808048	+	CG	0.00289855	690
chr1	4808049	-	CG	0.00128041	781
chr1	4808051	+	CG	0.00724638	690
chr1	4808052	-	CG	0.00389105	771
chr1	4808056	+	CG	0.00435414	689
chr1	4808057	-	CG	0.00641026	780
chr1	4808058	+	CG	0.00290276	689
chr1	4808059	-	CG	0.00256082	781
chr1	4808068	-	CG	0.060567	776
chr1	4808091	+	CG	0.0532787	244
chr1	4808094	+	CG	0	245
chr1	4808095	-	CG	0.00233645	428
chr1	4808099	+	CG	0.00409836	244
chr1	4808100	-	CG	0	429
chr1	4808102	+	CG	0	245
chr1	4808103	-	CG	0.004662	429
chr1	4808179	+	CG	0.00819672	244
chr1	4808180	-	CG	0.0185615	431
chr1	4808197	+	CG	0.0245902	244
chr1	4808198	-	CG	0.00697674	430
chr1	4808226	-	CG	0.0420561	428
chr1	4808776	+	CG	0.30303	132
chr1	4808960	+	CG	0.365672	134
chr1	4808961	-	CG	0.478261	69
chr1	4808988	-	CG	0.869565	69
chr1	4812186	+	CG	1	7
chr1	4812199	+	CG	1	7
chr1	4812200	-	CG	0.75	8
chr1	4812229	+	CG	1	7
chr1	4812230	-	CG	0.125	8
chr1	4812254	-	CG	0.714286	7
chr1	4812436	+	CG	0.833333	6
chr1	4823708	-	CG	0.857143	14
chr1	4823722	-	CG	0	7
chr1	4823762	-	CG	0	14
chr1	4823774	-	CG	1	14
chr1	4839196	+	CG	0.991736	121
chr1	4839200	+	CG	0.95082	122
chr1	4839201	-	CG	0.96875	160
chr1	4839208	+	CG	0.991803	122
chr1	4839209	-	CG	0.96875	160
chr1	4839212	+	CG	0.983607	122
chr1	4839213	-	CG	0.9375	160
chr1	4839362	-	CG	0.842767	159
chr1	4857516	+	CG	0.0708215	706
chr1	4857527	+	CG	0.00141044	709
chr1	4857528	-	CG	0.0045045	666
chr1	4857537	+	CG	0.00705219	709
chr1	4857538	-	CG	0.003003	666
chr1	4857550	+	CG	0.0127119	708
chr1	4857551	-	CG	0.00455235	659
chr1	4857573	+	CG	0.00987306	709
chr1	4857574	-	CG	0.0015015	666
chr1	4857583	-	CG	0.0741301	661
chr1	4857631	+	CG	0.0397112	277
chr1	4857654	+	CG	0.00364964	274
chr1	4857655	-	CG	0.0101523	197
chr1	4857676	+	CG	0	278
chr1	4857677	-	CG	0.00505051	198
chr1	4857763	+	CG	0	280
chr1	4857764	-	CG	0.01	200
chr1	4857775	+	CG	0	280
chr1	4857776	-	CG	0	200
chr1	4857780	+	CG	0	280
chr1	4857781	-	CG	0.01	200
chr1	4857793	+	CG	0.00357143	280
chr1	4857794	-	CG	0	199
chr1	4857796	+	CG	0.00714286	280
chr1	4857797	-	CG	0	199
chr1	4857798	+	CG	0.00357143	280
chr1	4857799	-	CG	0.0100503	199
chr1	4857804	-	CG	0.0461538	195
chr1	4857907	+	CG	0.0774059	956
chr1	4857922	+	CG	0.00208117	961
chr1	4857923	-	CG	0.00717703	418
chr1	4857932	+	CG	0.00416233	961
chr1	4857933	-	CG	0.00717703	418
chr1	4857975	+	CG	0.00416233	961
chr1	4857976	-	CG	0.00717703	418
chr1	4857982	+	CG	0.00208117	961
chr1	4857983	-	CG	0.00956938	418
chr1	4857986	+	CG	0.00312175	961
chr1	4857987	-	CG	0.00239234	418
chr1	4857993	-	CG	0.0555556	414
chr1	4858078	+	CG	0.0643777	699
chr1	4858092	+	CG	0.00568182	704
chr1	4858093	-	CG	0.00189394	528
chr1	4858103	+	CG	0.00142045	704
chr1	4858104	-	CG	0.00189036	529
chr1	4858107	+	CG	0.00284091	704
chr1	4858108	-	CG	0.00188679	530
chr1	4858133	+	CG	0.0056899	703
chr1	4858134	-	CG	0.00377358	530
chr1	4858136	+	CG	0.00711238	703
chr1	4858137	-	CG	0.00190476	525
chr1	4858156	+	CG	0.00286123	699
chr1	4858157	-	CG	0.00378788	528
chr1	4858163	+	CG	0.0042735	702
chr1	4858164	-	CG	0.0019084	524
chr1	4858166	+	CG	0.00569801	702
chr1	4858167	-	CG	0.00380952	525
chr1	4858169	+	CG	0.0333333	150
chr1	4858170	-	CG	0.0382409	523
chr1	4858183	+	CG	0.0266667	150
chr1	4858184	-	CG	0	248
chr1	4858189	+	CG	0.00662252	151
chr1	4858190	-	CG	0.00403226	248
chr1	4858199	+	CG	0	151
chr1	4858200	-	CG	0	248
chr1	4858201	+	CG	0	150
chr1	4858202	-	CG	0	247
chr1	4858215	+	CG	0	150
chr1	4858216	-	CG	0.00806452	248
chr1	4858281	+	CG	0	151
chr1	4858282	-	CG	0	248
chr1	4858284	+	CG	0.00662252	151
chr1	4858285	-	CG	0.00411523	243
chr1	4858299	+	CG	0.00662252	151
chr1	4858300	-	CG	0.00806452	248
chr1	4858306	+	CG	0	151
chr1	4858307	-	CG	0.00403226	248
chr1	4858310	+	CG	0.00662252	151
chr1	4858311	-	CG	0.00404858	247
chr1	4858319	-	CG	0.0566802	247
chr1	4864937	+	CG	0.956204	137
chr1	4865101	-	CG	0.912088	91
chr1	4866833	-	CG	1	10
chr1	4866852	-	CG	0.9	10
chr1	4866856	-	CG	1	10
chr1	4866868	-	CG	1	10
chr1	4879878	+	CG	0.857143	7
chr1	4879888	+	CG	1	7
chr1	4891115	-	CG	0	12
chr1	4891119	-	CG	1	12
chr1	4891132	-	CG	0.833333	12
chr1	4906332	+	CG	0.9	20
chr1	4906577	-	CG	0.976471	85
chr1	4912170	+	CG	0.965517	203
chr1	4912279	+	CG	0.958904	73
chr1	4912280	-	CG	0.96124	516
chr1	4912290	+	CG	0.931507	73
chr1	4912291	-	CG	0.946429	224
chr1	4912450	+	CG	0.902778	72
chr1	4912451	-	CG	0.941964	224
chr1	4912463	-	CG	0.936937	222
chr1	4916335	-	CG	0.805195	77
chr1	4916341	-	CG	0.805195	77
chr1	4916373	-	CG	0.818182	77
chr1	4924873	+	CG	0.888889	9
chr1	4924904	+	CG	1	10
chr1	4924923	+	CG	0.8	10
chr1	4932093	+	CG	0.967213	183
chr1	4932215	+	CG	0.972973	185
chr1	4932216	-	CG	0.990323	310
chr1	4932227	+	CG	0.989247	186
chr1	4932228	-	CG	0.970968	310
chr1	4932232	+	CG	0.956989	186
chr1	4932233	-	CG	0.958065	310
chr1	4932236	+	CG	0.973118	186
chr1	4932237	-	CG	0.964516	310
chr1	4932261	-	CG	0.925806	310
chr1	4940752	+	CG	0.6	5
chr1	4940792	+	CG	0.4	5
chr1	4947312	+	CG	0.829308	621
chr1	4947334	+	CG	0.919743	623
chr1	4947335	-	CG	0.90611	671
chr1	4947370	+	CG	0.875806	620
chr1	4947371	-	CG	0.854167	672
chr1	4947372	+	CG	0.919485	621
chr1	4947373	-	CG	0.919643	672
chr1	4947406	-	CG	0.879104	670
chr1	4947571	+	CG	0.846154	13
chr1	4947722	+	CG	1	13
chr1	4950980	-	CG	0.857143	7
chr1	4953113	+	CG	0.833333	12
chr1	4985443	+	CG	0.970588	34
chr1	4985480	+	CG	0.970588	34
chr1	4985484	+	CG	0.970588	34
chr1	4985491	+	CG	0.735294	34
chr1	4986357	+	CG	1	146
chr1	4986379	+	CG	0.863946	147
chr1	4986380	-	CG	0.943662	71
chr1	4986392	+	CG	0.938776	147
chr1	4986393	-	CG	0.928571	70
chr1	4986550	+	CG	0.932432	148
chr1	4986551	-	CG	0.985915	71
chr1	4986558	-	CG	1	71
chr1	4987907	+	CG	1	9
chr1	4987914	+	CG	0.993348	451
chr1	4987915	-	CG	0	14
chr1	4987922	+	CG	0.986755	453
chr1	4987923	-	CG	0.976356	719
chr1	4987945	+	CG	0.980132	453
chr1	4987946	-	CG	0.980583	721
chr1	4987968	+	CG	0.97351	453
chr1	4987969	-	CG	0.988889	720
chr1	4987980	+	CG	0.987993	583
chr1	4987981	-	CG	0.984658	717
chr1	4987985	+	CG	0.982906	585
chr1	4987986	-	CG	0.980263	456
chr1	4988007	+	CG	0.931624	585
chr1	4988008	-	CG	0.934354	457
chr1	4988086	+	CG	0.988764	89
chr1	4988087	-	CG	0.969298	456
chr1	4988095	+	CG	0.977528	89
chr1	4988096	-	CG	0.951724	145
chr1	4988316	-	CG	0.965517	145
chr1	5018897	+	CG	0.030303	264
chr1	5018910	+	CG	0	265
chr1	5018911	-	CG	0	494
chr1	5018915	+	CG	0.00377358	265
chr1	5018916	-	CG	0.00607287	494
chr1	5018943	+	CG	0.0112782	266
chr1	5018944	-	CG	0.00622407	482
chr1	5019021	+	CG	0.00380228	263
chr1	5019022	-	CG	0.0020202	495
chr1	5019028	+	CG	0.00380228	263
chr1	5019029	-	CG	0	495
chr1	5019045	+	CG	0.0516129	155
chr1	5019046	-	CG	0.0408998	489
chr1	5019077	+	CG	0	157
chr1	5019078	-	CG	0.00321543	311
chr1	5019091	+	CG	0	157
chr1	5019092	-	CG	0.00641026	312
chr1	5019122	-	CG	0	5
chr1	5019139	-	CG	0	5
chr1	5019163	+	CG	0	157
chr1	5019164	-	CG	0.00322581	310
chr1	5019190	-	CG	0.0459016	305
chr1	5019539	+	CG	0.044	250
chr1	5019542	+	CG	0	250
chr1	5019543	-	CG	0.00421053	475
chr1	5019546	+	CG	0.016	250
chr1	5019547	-	CG	0.00210526	475
chr1	5019550	+	CG	0.008	250
chr1	5019551	-	CG	0.00210526	475
chr1	5019581	+	CG	0.0119522	251
chr1	5019582	-	CG	0.00621118	483
chr1	5019595	-	CG	0	10
chr1	5019603	-	CG	0	9
chr1	5019611	+	CG	0.004	250
chr1	5019612	-	CG	0	6
chr1	5019642	+	CG	0	248
chr1	5019643	-	CG	0.00414079	483
chr1	5019646	+	CG	0	248
chr1	5019647	-	CG	0.00414079	483
chr1	5019650	+	CG	0.00403226	248
chr1	5019651	-	CG	0.00414079	483
chr1	5019658	+	CG	0.0188679	53
chr1	5019659	-	CG	0.0622407	482
chr1	5019682	+	CG	0	53
chr1	5019683	-	CG	0	15
chr1	5019687	+	CG	0.0377358	53
chr1	5019688	-	CG	0	15
chr1	5019701	+	CG	0	53
chr1	5019702	-	CG	0	16
chr1	5019704	+	CG	0	49
chr1	5019705	-	CG	0	16
chr1	5019847	+	CG	0.111111	54
chr1	5019848	-	CG	0	15
chr1	5019858	+	CG	0	54
chr1	5019859	-	CG	0	15
chr1	5019860	+	CG	0	54
chr1	5019861	-	CG	0	15
chr1	5019885	+	CG	0.0384615	130
chr1	5019886	-	CG	0	15
chr1	5019892	+	CG	0.00775194	129
chr1	5019893	-	CG	0.0051458	583
chr1	5019894	+	CG	0.00769231	130
chr1	5019895	-	CG	0.010274	584
chr1	5019909	+	CG	0.0153846	130
chr1	5019910	-	CG	0.010274	584
chr1	5020037	+	CG	0.0752688	651
chr1	5020038	-	CG	0.0446735	582
chr1	5020055	+	CG	0.00610687	655
chr1	5020056	-	CG	0	304
chr1	5020072	+	CG	0.00619195	646
chr1	5020073	-	CG	0.00657895	304
chr1	5020116	-	CG	0.0866667	300
chr1	5020123	+	CG	0.0753012	332
chr1	5020141	+	CG	0.011976	334
chr1	5020142	-	CG	0.00484262	413
chr1	5020162	+	CG	0.00980392	306
chr1	5020163	-	CG	0.00726392	413
chr1	5020171	+	CG	0.011976	334
chr1	5020172	-	CG	0.0145278	413
chr1	5020190	-	CG	0.0948905	411
chr1	5020575	+	CG	0.0816733	502
chr1	5020612	+	CG	0.0489362	470
chr1	5020613	-	CG	0.0280702	855
chr1	5020646	-	CG	0.0951821	851
chr1	5022851	+	CG	0.0858896	326
chr1	5022863	+	CG	0.0550459	327
chr1	5022864	-	CG	0.0438596	228
chr1	5022897	+	CG	0.0462963	324
chr1	5022898	-	CG	0.0438596	228
chr1	5022926	+	CG	0.0515152	330
chr1	5022927	-	CG	0.0394737	228
chr1	5022929	+	CG	0.0486322	329
chr1	5022930	-	CG	0.0526316	228
chr1	5022935	+	CG	0.0636364	330
chr1	5022936	-	CG	0.0482456	228
chr1	5022941	+	CG	0.0424242	330
chr1	5022942	-	CG	0.0350877	228
chr1	5022945	+	CG	0.0545455	330
chr1	5022946	-	CG	0.0394737	228
chr1	5022970	-	CG	0.0666667	225
chr1	5023356	+	CG	0.131944	144
chr1	5023359	+	CG	0.0694444	144
chr1	5023384	+	CG	0.0684932	146
chr1	5023512	+	CG	0.0136054	147
chr1	5023520	+	CG	0.0340136	147
chr1	5023530	+	CG	0.00680272	147
chr1	5023553	+	CG	0.0570175	228
chr1	5023713	+	CG	0.00436681	229
chr1	5023714	-	CG	0	270
chr1	5023724	+	CG	0.05	40
chr1	5023725	-	CG	0.0337079	267
chr1	5023765	+	CG	0.0238095	42
chr1	5023766	-	CG	0	31
chr1	5023974	-	CG	0.172414	29
chr1	5034964	+	CG	0.917722	632
chr1	5035115	-	CG	0.974843	159
chr1	5040706	-	CG	0	11
chr1	5040713	-	CG	0.909091	11
chr1	5040722	-	CG	0.727273	11
chr1	5040750	+	CG	0.926667	150
chr1	5040751	-	CG	1	11
chr1	5040791	+	CG	0.668874	151
chr1	5040792	-	CG	0.922675	957
chr1	5040793	+	CG	0.853333	150
chr1	5040794	-	CG	0.925887	958
chr1	5040871	+	CG	0.953642	151
chr1	5040872	-	CG	0.917965	963
chr1	5040907	-	CG	0.954071	958
chr1	5044304	+	CG	0.982558	172
chr1	5044347	+	CG	0.763006	173
chr1	5044348	-	CG	0.48	25
chr1	5044498	+	CG	0.852071	169
chr1	5044499	-	CG	0.84	25
chr1	5044508	-	CG	1	25
chr1	5046621	+	CG	0.954545	44
chr1	5046632	+	CG	0.704545	44
chr1	5046633	-	CG	0.698795	83
chr1	5046743	+	CG	0.659091	44
chr1	5046744	-	CG	0.674699	83
chr1	5046769	+	CG	0.840909	44
chr1	5046770	-	CG	0.879518	83
chr1	5046788	-	CG	0.86747	83
chr1	5047417	-	CG	0.866667	30
chr1	5047449	-	CG	0.875	32
chr1	5047482	-	CG	0.96875	32
chr1	5052431	+	CG	0.961905	105
chr1	5052524	+	CG	0.981132	106
chr1	5052525	-	CG	0.974446	587
chr1	5052533	+	CG	0.981132	106
chr1	5052534	-	CG	0.981261	587
chr1	5052538	-	CG	0.988075	587
chr1	5057005	-	CG	1	7
chr1	5057110	-	CG	0.833333	6
chr1	5066737	+	CG	0.882653	196
chr1	5066767	+	CG	0.707692	195
chr1	5071734	+	CG	1	36
chr1	5076842	+	CG	0.888889	9
chr1	5076917	+	CG	0	11
chr1	5076918	-	CG	0.166667	6
chr1	5076921	+	CG	1	11
chr1	5076922	-	CG	0.5	6
chr1	5076971	-	CG	0.944444	198
chr1	5076978	-	CG	0.2	5
chr1	5077002	-	CG	0.538462	26
chr1	5077011	-	CG	0.740741	27
chr1	5077039	-	CG	0.888889	27
chr1	5077043	-	CG	0.851852	27
chr1	5082047	+	CG	1	24
chr1	5082285	-	CG	1	45
chr1	5083139	+	CG	0.061828	372
chr1	5083160	+	CG	0.0133333	375
chr1	5083161	-	CG	0	474
chr1	5083165	+	CG	0.00797872	376
chr1	5083166	-	CG	0.00421053	475
chr1	5083174	+	CG	0.00531915	376
chr1	5083175	-	CG	0.00631579	475
chr1	5083180	+	CG	0.008	375
chr1	5083181	-	CG	0.00632911	474
chr1	5083186	+	CG	0.00534759	374
chr1	5083187	-	CG	0.00421053	475
chr1	5083205	+	CG	0.00534759	374
chr1	5083206	-	CG	0.00425532	470
chr1	5083222	+	CG	0.0080429	373
chr1	5083223	-	CG	0	469
chr1	5083229	+	CG	0.00268817	372
chr1	5083230	-	CG	0.0021322	469
chr1	5083233	+	CG	0.0362903	496
chr1	5083234	-	CG	0.0686695	466
chr1	5083236	+	CG	0.00202429	494
chr1	5083237	-	CG	0.00857633	583
chr1	5083244	+	CG	0.00604839	496
chr1	5083245	-	CG	0.00171527	583
chr1	5083248	+	CG	0.00200803	498
chr1	5083249	-	CG	0.0102916	583
chr1	5083252	+	CG	0.00201207	497
chr1	5083253	-	CG	0.0102916	583
chr1	5083266	+	CG	0.00601202	499
chr1	5083267	-	CG	0.00343053	583
chr1	5083286	+	CG	0.00200401	499
chr1	5083287	-	CG	0.00517241	580
chr1	5083303	+	CG	0	5
chr1	5083304	-	CG	0.0982759	580
chr1	5083333	+	CG	0.0803383	473
chr1	5083337	+	CG	0.00840336	476
chr1	5083338	-	CG	0.00497512	402
chr1	5083339	+	CG	0.00630252	476
chr1	5083340	-	CG	0.00746269	402
chr1	5083351	+	CG	0.00209644	477
chr1	5083352	-	CG	0.00744417	403
chr1	5083357	+	CG	0.00842105	475
chr1	5083358	-	CG	0.00990099	404
chr1	5083376	+	CG	0.00231481	432
chr1	5083377	-	CG	0.00247525	404
chr1	5083393	+	CG	0.00209644	477
chr1	5083394	-	CG	0.00247525	404
chr1	5083395	+	CG	0	477
chr1	5083396	-	CG	0.00248139	403
chr1	5083416	+	CG	0	7
chr1	5083417	-	CG	0.0579345	397
chr1	5108696	+	CG	1	5
chr1	5132166	+	CG	0.933333	15
chr1	5166278	+	CG	0.926036	338
chr1	5166279	-	CG	0.869565	23
chr1	5166412	-	CG	0.981132	424
chr1	5170394	+	CG	0.95	120
chr1	5170402	+	CG	0.991667	120
chr1	5170403	-	CG	0.964072	167
chr1	5170428	+	CG	0.933333	120
chr1	5170429	-	CG	0.946746	169
chr1	5170570	+	CG	0.925	120
chr1	5170571	-	CG	0.929412	170
chr1	5170585	+	CG	0.975	120
chr1	5170586	-	CG	0.964706	170
chr1	5170588	+	CG	0.958333	120
chr1	5170589	-	CG	0.941176	170
chr1	5170599	+	CG	0.959064	171
chr1	5170600	-	CG	0.964286	168
chr1	5170626	+	CG	0.959302	172
chr1	5170627	-	CG	0.909091	11
chr1	5170637	+	CG	0.953488	172
chr1	5170638	-	CG	1	11
chr1	5170745	+	CG	0.813953	172
chr1	5170746	-	CG	0.7	10
chr1	5170747	+	CG	0.819767	172
chr1	5170748	-	CG	1	10
chr1	5170759	+	CG	0.929825	171
chr1	5170760	-	CG	1	10
chr1	5170765	-	CG	1	10
chr1	5175456	+	CG	0.984848	198
chr1	5175569	-	CG	0.72643	647
chr1	5184470	+	CG	0.922965	688
chr1	5184496	+	CG	0.934783	690
chr1	5184497	-	CG	0.887367	657
chr1	5184523	+	CG	0.926087	690
chr1	5184524	-	CG	0.922492	658
chr1	5184540	-	CG	0.958841	656
chr1	5189203	-	CG	0	258
chr1	5189206	+	CG	0.9625	160
chr1	5189207	-	CG	0.00387597	258
chr1	5189226	+	CG	0.96319	163
chr1	5189227	-	CG	0.952727	275
chr1	5189242	+	CG	0.0248447	161
chr1	5189243	-	CG	0.910714	280
chr1	5189281	+	CG	0.971014	69
chr1	5189289	+	CG	0.869565	69
chr1	5189290	-	CG	0.866667	15
chr1	5189291	+	CG	0.884058	69
chr1	5189292	-	CG	1	15
chr1	5189329	+	CG	0.956522	23
chr1	5189340	+	CG	0.94	300
chr1	5189356	+	CG	0.837209	301
chr1	5189357	-	CG	0.455357	112
chr1	5189374	+	CG	0.881503	346
chr1	5189375	-	CG	0.843478	115
chr1	5189394	+	CG	0.909639	332
chr1	5189395	-	CG	0.861111	108
chr1	5189399	+	CG	0.876133	331
chr1	5189400	-	CG	0.833333	108
chr1	5189409	+	CG	0.903553	197
chr1	5189410	-	CG	0.943925	107
chr1	5189440	+	CG	0.969697	198
chr1	5189441	-	CG	0.958621	290
chr1	5189456	+	CG	0.948357	213
chr1	5189457	-	CG	0.933216	569
chr1	5189477	+	CG	0.872642	212
chr1	5189478	-	CG	0.88225	569
chr1	5189481	+	CG	0.915094	212
chr1	5189482	-	CG	0.950791	569
chr1	5189496	-	CG	0.975352	568
chr1	5189554	+	CG	0.957386	704
chr1	5189555	-	CG	0.947368	19
chr1	5189570	+	CG	0.946328	708
chr1	5189574	+	CG	0.970339	708
chr1	5189608	+	CG	0.975989	708
chr1	5195338	+	CG	0.980132	151
chr1	5195488	-	CG	0.944444	72
chr1	5254551	+	CG	0.8	10
chr1	5254554	+	CG	1	10
chr1	5254555	-	CG	0.666667	9
chr1	5254587	+	CG	0.9	10
chr1	5254588	-	CG	0.666667	9
chr1	5254698	-	CG	1	9
chr1	5260834	+	CG	0.866667	105
chr1	5261035	+	CG	0.52381	105
chr1	5261036	-	CG	0.534483	58
chr1	5261043	+	CG	0.462264	106
chr1	5261044	-	CG	0.5	58
chr1	5261051	+	CG	0.90566	106
chr1	5261052	-	CG	0.931034	58
chr1	5261063	-	CG	0.877193	57
chr1	5266971	+	CG	0.992958	142
chr1	5267001	+	CG	0.853147	143
chr1	5267002	-	CG	0.74359	156
chr1	5267122	-	CG	0.980645	155
chr1	5272761	+	CG	0.907173	237
chr1	5272766	+	CG	0.78903	237
chr1	5272784	+	CG	0.896825	252
chr1	5272793	+	CG	1	15
chr1	5272794	-	CG	0.977528	89
chr1	5272918	+	CG	0.857143	14
chr1	5272919	-	CG	0.932584	89
chr1	5272925	+	CG	1	12
chr1	5272926	-	CG	0.977528	89
chr1	5272929	+	CG	1	12
chr1	5272930	-	CG	0.786517	89
chr1	5272932	+	CG	1	12
chr1	5272933	-	CG	0.977528	89
chr1	5272942	+	CG	0.928571	14
chr1	5272943	-	CG	0.94382	89
chr1	5272962	+	CG	0.905882	255
chr1	5272967	+	CG	0.776471	255
chr1	5272985	+	CG	0.87451	255
chr1	5272990	+	CG	0	7
chr1	5273025	+	CG	0.857143	7
chr1	5275233	+	CG	0.823096	407
chr1	5275299	+	CG	0.901961	408
chr1	5275300	-	CG	0.869501	682
chr1	5275321	-	CG	0.958702	678
chr1	5288302	+	CG	0.939394	66
chr1	5288344	+	CG	0.984848	66
chr1	5288345	-	CG	0.98	50
chr1	5288355	-	CG	0.94	50
chr1	5293930	-	CG	0.969512	164
chr1	5299164	+	CG	0.841176	340
chr1	5299281	+	CG	0.44898	343
chr1	5299282	-	CG	0.732143	56
chr1	5299292	+	CG	0.950437	343
chr1	5299293	-	CG	0.803571	56
chr1	5299310	+	CG	0.940541	185
chr1	5299311	-	CG	0.946429	56
chr1	5299404	+	CG	0.790323	186
chr1	5299405	-	CG	0.765182	494
chr1	5299432	+	CG	0.956757	185
chr1	5299433	-	CG	0.931174	494
chr1	5299451	-	CG	0.985772	492
chr1	5320283	+	CG	0.95098	102
chr1	5320478	+	CG	0.789675	523
chr1	5320479	-	CG	0.731707	123
chr1	5320571	-	CG	0.846816	581
chr1	5350396	+	CG	1	5
chr1	5350400	+	CG	1	5
chr1	5350413	+	CG	1	6
chr1	5350420	+	CG	0.666667	6
chr1	5350421	-	CG	0.917051	434
chr1	5350423	+	CG	1	6
chr1	5350424	-	CG	0.967742	434
chr1	5350461	-	CG	0.907834	434
chr1	5350572	-	CG	0.3	10
chr1	5350575	+	CG	0.945946	74
chr1	5350576	-	CG	0.2	10
chr1	5350587	+	CG	0.891892	74
chr1	5350588	-	CG	0.901786	112
chr1	5350608	+	CG	0.763889	72
chr1	5350609	-	CG	0.9	110
chr1	5350612	+	CG	0.916667	72
chr1	5350613	-	CG	0.972727	110
chr1	5350625	+	CG	1	190
chr1	5350626	-	CG	0.962617	107
chr1	5350632	+	CG	0.973684	190
chr1	5350635	+	CG	0.978947	190
chr1	5350743	-	CG	0.933333	435
chr1	5350753	-	CG	0.818182	11
chr1	5350769	-	CG	0	5
chr1	5350784	-	CG	0.857143	35
chr1	5350787	+	CG	0.970425	541
chr1	5350788	-	CG	0.885714	35
chr1	5350799	+	CG	0.887246	541
chr1	5350800	-	CG	0.940299	67
chr1	5350820	+	CG	0.883549	541
chr1	5350821	-	CG	0.882353	34
chr1	5350824	+	CG	0.974122	541
chr1	5350825	-	CG	1	34
chr1	5350838	-	CG	1	6
chr1	5350915	+	CG	0.958549	193
chr1	5350916	-	CG	0	5
chr1	5350929	+	CG	0.896907	194
chr1	5350930	-	CG	1	5
chr1	5350999	+	CG	0.983051	118
chr1	5351011	+	CG	0.966387	119
chr1	5351012	-	CG	0.920635	63
chr1	5351032	+	CG	0.798319	119
chr1	5351033	-	CG	0.873016	63
chr1	5351036	+	CG	0.957983	119
chr1	5351037	-	CG	0.983871	62
chr1	5351050	-	CG	0.967742	62
chr1	5351141	+	CG	0.728814	118
chr1	5351166	+	CG	0.920354	113
chr1	5351211	+	CG	0.957895	95
chr1	5351244	+	CG	0.897959	98
chr1	5351245	-	CG	0.940541	185
chr1	5351248	+	CG	0.938144	97
chr1	5351249	-	CG	0.956757	185
chr1	5351263	-	CG	0.934066	182
chr1	5380705	+	CG	0.821429	28
chr1	5380880	-	CG	0.885813	289
chr1	5423628	+	CG	0.926948	616
chr1	5423665	+	CG	0.82391	619
chr1	5423666	-	CG	0.804006	699
chr1	5423715	-	CG	0.971469	701
chr1	5429341	-	CG	1	10
chr1	5429843	+	CG	1	9
chr1	5429878	+	CG	1	9
chr1	5429879	-	CG	0.968531	286
chr1	5429938	+	CG	0.882353	34
chr1	5429939	-	CG	1	8
chr1	5429956	+	CG	0.935484	31
chr1	5429957	-	CG	0.97351	151
chr1	5429960	+	CG	0.83871	31
chr1	5429961	-	CG	0.980132	151
chr1	5429999	+	CG	0.916667	24
chr1	5430000	-	CG	0.966443	149
chr1	5430028	+	CG	0.916667	24
chr1	5430029	-	CG	0.984615	455
chr1	5430032	+	CG	0.958333	24
chr1	5430033	-	CG	0.953846	455
chr1	5430037	+	CG	0.958333	24
chr1	5430038	-	CG	0.927473	455
chr1	5430044	+	CG	0.833333	24
chr1	5430045	-	CG	0.898901	455
chr1	5430051	+	CG	0.925926	162
chr1	5430052	-	CG	0.972222	396
chr1	5430086	+	CG	0.981595	163
chr1	5430087	-	CG	0.911458	192
chr1	5430147	-	CG	0.666667	6
chr1	5430164	+	CG	0.942857	35
chr1	5430165	-	CG	0.833333	144
chr1	5430166	+	CG	0.771429	35
chr1	5430167	-	CG	0.951724	145
chr1	5430168	+	CG	0.828571	35
chr1	5430169	-	CG	0.910345	145
chr1	5430207	+	CG	1	7
chr1	5430208	-	CG	0.992857	140
chr1	5430236	+	CG	0.935484	31
chr1	5430237	-	CG	0.983333	60
chr1	5430240	+	CG	0.967742	31
chr1	5430241	-	CG	0.916667	60
chr1	5430245	+	CG	0.967742	31
chr1	5430246	-	CG	0.9	60
chr1	5430252	+	CG	0.83871	31
chr1	5430253	-	CG	0.866667	60
chr1	5430259	+	CG	0.833333	6
chr1	5430260	-	CG	0.875	64
chr1	5430294	+	CG	1	7
chr1	5430295	-	CG	0.907407	54
chr1	5430355	-	CG	1	6
chr1	5430372	+	CG	0.965116	172
chr1	5430373	-	CG	0.810127	237
chr1	5430374	+	CG	0.971098	173
chr1	5430375	-	CG	0.877637	237
chr1	5430391	+	CG	0.930636	173
chr1	5430392	-	CG	0.831224	237
chr1	5430415	+	CG	0.981651	109
chr1	5430416	-	CG	0.961864	236
chr1	5430444	+	CG	0.972222	108
chr1	5430445	-	CG	0.96	150
chr1	5430448	+	CG	0.944444	108
chr1	5430449	-	CG	0.945946	148
chr1	5430580	+	CG	0.982301	113
chr1	5430581	-	CG	0.937888	161
chr1	5430582	+	CG	0.99115	113
chr1	5430583	-	CG	0.987097	155
chr1	5430584	+	CG	0.982301	113
chr1	5430585	-	CG	0.981366	161
chr1	5430624	-	CG	0.928571	154
chr1	5436256	+	CG	0.972603	73
chr1	5436407	-	CG	0.942308	156
chr1	5526553	+	CG	0.944444	72
chr1	5526704	-	CG	0.875	40
chr1	5545528	-	CG	0.444444	9
chr1	5545558	-	CG	0.888889	9
chr1	5567129	+	CG	1	8
chr1	5567150	+	CG	1	8
chr1	5567151	-	CG	1	6
chr1	5567166	+	CG	1	8
chr1	5567167	-	CG	1	6
chr1	5567186	+	CG	0	8
chr1	5567187	-	CG	0	6
chr1	5567196	+	CG	0.875	8
chr1	5567197	-	CG	1	6
chr1	5567211	+	CG	0.875	8
chr1	5567212	-	CG	1	6
chr1	5567226	+	CG	1	7
chr1	5567227	-	CG	1	6
chr1	5567232	-	CG	1	6
chr1	5574303	+	CG	0.995169	207
chr1	5574344	+	CG	0.725962	208
chr1	5574345	-	CG	0.957447	94
chr1	5574451	-	CG	0.925532	94
chr1	5576106	-	CG	0.185185	54
chr1	5576180	+	CG	0.96	150
chr1	5576181	-	CG	0.960784	51
chr1	5576331	-	CG	0.960784	102
chr1	5584498	+	CG	1	6
chr1	5584552	+	CG	0.909639	664
chr1	5584553	-	CG	1	21
chr1	5584657	+	CG	0.914634	246
chr1	5584658	-	CG	0.959016	488
chr1	5584864	-	CG	0.8875	80
chr1	5589215	+	CG	0.60355	507
chr1	5589237	+	CG	0.55773	511
chr1	5589238	-	CG	0.563549	417
chr1	5589305	-	CG	0.838942	416
chr1	5677066	+	CG	0.969072	97
chr1	5677082	+	CG	0.886598	97
chr1	5677083	-	CG	1	5
chr1	5677090	+	CG	0.835052	97
chr1	5677091	-	CG	1	5
chr1	5677105	+	CG	0.927835	97
chr1	5677106	-	CG	0.2	5
chr1	5677139	+	CG	0.875	96
chr1	5677140	-	CG	1	5
chr1	5677178	-	CG	1	5
chr1	5678613	+	CG	0.967546	493
chr1	5678649	+	CG	0.600806	496
chr1	5678650	-	CG	0.741214	313
chr1	5678740	-	CG	0.795527	313
chr1	5702065	+	CG	0.97619	42
chr1	5702216	-	CG	0.952381	21
chr1	5730209	-	CG	0.782609	23
chr1	5734091	-	CG	0.989362	94
chr1	5742409	+	CG	0.976744	215
chr1	5742560	-	CG	0.916667	12
chr1	5747021	-	CG	1	6
chr1	5747023	-	CG	1	6
chr1	5747027	-	CG	1	6
chr1	5747029	-	CG	1	6
chr1	5747046	-	CG	1	6
chr1	5747058	-	CG	1	6
chr1	5747068	-	CG	1	6
chr1	5747102	+	CG	1	10
chr1	5747105	+	CG	1	10
chr1	5747126	+	CG	0.2	10
chr1	5747140	+	CG	1	10
chr1	5747147	+	CG	1	10
chr1	5747163	+	CG	0.9	10
chr1	5783325	-	CG	1	15
chr1	5796525	+	CG	0.960983	692
chr1	5796629	-	CG	0.935484	341
chr1	5810057	+	CG	0.888889	9
chr1	5810110	+	CG	1	9
chr1	5810115	+	CG	0.777778	9
chr1	5810120	+	CG	1	9
chr1	5820005	+	CG	0.983871	62
chr1	5820040	+	CG	0.967742	62
chr1	5820041	-	CG	0.957958	666
chr1	5820119	-	CG	0.773613	667
chr1	5820123	-	CG	0.979592	147
chr1	5820138	-	CG	0.959184	147
chr1	5820161	+	CG	1	42
chr1	5820162	-	CG	0.904762	147
chr1	5820190	+	CG	0.904762	42
chr1	5820191	-	CG	0.95858	169
chr1	5820194	+	CG	1	42
chr1	5820195	-	CG	0.881657	169
chr1	5820206	+	CG	0.880952	42
chr1	5820207	-	CG	0.893491	169
chr1	5820213	+	CG	0.965463	637
chr1	5820214	-	CG	0.970238	168
chr1	5820308	+	CG	0	61
chr1	5820326	+	CG	0.962963	27
chr1	5820327	-	CG	0.962025	79
chr1	5820328	+	CG	0.923077	26
chr1	5820329	-	CG	0.962025	79
chr1	5820330	+	CG	0.576923	26
chr1	5820331	-	CG	1	79
chr1	5820370	-	CG	0.948718	78
chr1	5820398	+	CG	0.852941	34
chr1	5820402	+	CG	0.941176	34
chr1	5820407	+	CG	0.941176	34
chr1	5820414	+	CG	0.882353	34
chr1	5820421	+	CG	1	6
chr1	5820456	+	CG	1	7
chr1	5820457	-	CG	0.8	5
chr1	5820516	+	CG	0.954545	22
chr1	5820534	+	CG	0.973813	611
chr1	5820535	-	CG	0.96	50
chr1	5820536	+	CG	0.932897	611
chr1	5820537	-	CG	0.960784	51
chr1	5820538	+	CG	0.747954	611
chr1	5820539	-	CG	0.96	50
chr1	5820578	-	CG	0.960784	51
chr1	5826212	+	CG	1	17
chr1	5829069	+	CG	0.95534	515
chr1	5829132	+	CG	0.912409	137
chr1	5829133	-	CG	0.914657	539
chr1	5829321	-	CG	0.936975	238
chr1	5845801	-	CG	0	5
chr1	5850129	+	CG	0.815789	190
chr1	5850165	+	CG	0.787565	193
chr1	5850166	-	CG	0.804805	333
chr1	5850295	-	CG	0.894895	333
chr1	5862684	+	CG	0.8	50
chr1	5862873	-	CG	1	41
chr1	5863243	+	CG	0.913043	69
chr1	5863393	+	CG	1	5
chr1	5863394	-	CG	0.969231	65
chr1	5863439	+	CG	0.8	5
chr1	5874921	+	CG	0.905882	170
chr1	5875082	+	CG	0.959302	172
chr1	5875083	-	CG	0.955556	180
chr1	5875125	+	CG	0.907895	456
chr1	5875126	-	CG	0.960894	179
chr1	5875149	+	CG	0.566372	452
chr1	5875150	-	CG	0.566343	618
chr1	5875247	-	CG	0.987055	618
chr1	5916135	+	CG	0.779468	789
chr1	5916218	+	CG	0.68256	797
chr1	5916219	-	CG	0.626932	453
chr1	5916244	+	CG	0.364351	763
chr1	5916245	-	CG	0.426667	450
chr1	5916280	+	CG	0.344114	773
chr1	5916281	-	CG	0.346154	468
chr1	5916314	+	CG	0.279639	776
chr1	5916315	-	CG	0.255864	469
chr1	5916333	-	CG	0.382479	468
chr1	5916643	+	CG	0.0266667	150
chr1	5916677	+	CG	0.0463576	151
chr1	5916678	-	CG	0.0273224	183
chr1	5916686	+	CG	0.0394737	152
chr1	5916687	-	CG	0.0491803	183
chr1	5916796	+	CG	0.0130719	153
chr1	5916805	+	CG	0.0196078	153
chr1	5916806	-	CG	0	183
chr1	5916821	+	CG	0	152
chr1	5916822	-	CG	0	184
chr1	5916823	+	CG	0.0263158	152
chr1	5916824	-	CG	0.0108696	184
chr1	5916831	+	CG	0.00657895	152
chr1	5916832	-	CG	0.0164835	182
chr1	5916839	+	CG	0.0131579	152
chr1	5916840	-	CG	0	182
chr1	5916844	-	CG	0.0276243	181
chr1	5917473	+	CG	0.0227273	44
chr1	5917721	-	CG	0.0344828	29
chr1	5920367	+	CG	0.95122	82
chr1	5920517	-	CG	0.931034	87
chr1	5964080	+	CG	0.882353	34
chr1	5964185	+	CG	0.866667	30
chr1	5964186	-	CG	0.974063	347
chr1	5964205	+	CG	0.0344828	29
chr1	5982406	+	CG	0.962525	507
chr1	5982415	+	CG	0.952849	509
chr1	5982416	-	CG	0.948435	543
chr1	5982431	+	CG	0.923379	509
chr1	5982432	-	CG	0.928309	544
chr1	5982440	+	CG	0.956778	509
chr1	5982441	-	CG	0.965074	544
chr1	5982468	+	CG	0.974277	622
chr1	5982469	-	CG	0.979779	544
chr1	5982481	+	CG	0.971246	626
chr1	5982482	-	CG	0.972973	629
chr1	5982531	+	CG	0.9408	625
chr1	5982532	-	CG	0.960254	629
chr1	5982552	+	CG	0.90625	288
chr1	5982553	-	CG	0.89172	628
chr1	5982571	+	CG	0.903114	289
chr1	5982572	-	CG	0.937107	159
chr1	5982615	+	CG	0.955017	289
chr1	5982616	-	CG	0.90566	159
chr1	5982661	-	CG	0.974522	157
chr1	5984277	-	CG	0	5
chr1	5984285	-	CG	1	5
chr1	5984308	-	CG	0	5
chr1	5984339	-	CG	1	5
chr1	5984908	+	CG	1	5
chr1	5984915	+	CG	0.8	5
chr1	5984929	+	CG	0.8	5
chr1	5991040	+	CG	0.689655	29
chr1	5991075	+	CG	0	29
chr1	5993217	-	CG	0.777778	9
chr1	5993221	-	CG	0.333333	9
chr1	5993235	-	CG	0.829268	41
chr1	5993255	-	CG	0.97561	41
chr1	5993260	-	CG	0.926829	41
chr1	5993270	-	CG	0.926829	41
chr1	5993280	+	CG	0.5	6
chr1	5993281	-	CG	0.333333	6
chr1	5993300	+	CG	1	6
chr1	5993301	-	CG	0.933333	45
chr1	5993316	+	CG	0.833333	6
chr1	5993317	-	CG	0.787234	47
chr1	5993322	+	CG	0	6
chr1	5993323	-	CG	0	47
chr1	5993337	+	CG	1	6
chr1	5993338	-	CG	0.808511	47
chr1	5993341	+	CG	1	6
chr1	5993342	-	CG	0.893617	47
chr1	5998975	+	CG	0.971098	173
chr1	5999126	-	CG	0.931034	58
chr1	6012918	-	CG	1	14
chr1	6012961	-	CG	0.894737	19
chr1	6012965	-	CG	1	17
chr1	6012974	-	CG	1	17
chr1	6013002	+	CG	1	9
chr1	6013003	-	CG	1	16
chr1	6013040	+	CG	0.777778	9
chr1	6013074	+	CG	0.888889	9
chr1	6013089	+	CG	0.888889	9
chr1	6013096	+	CG	0.888889	9
chr1	6026898	+	CG	0.87619	210
chr1	6026899	-	CG	0	11
chr1	6026920	+	CG	0.914286	210
chr1	6026921	-	CG	0.894459	379
chr1	6026931	+	CG	0.938095	210
chr1	6026932	-	CG	0.976253	379
chr1	6026935	+	CG	0.92381	210
chr1	6026936	-	CG	0.933862	378
chr1	6027009	+	CG	0.961905	210
chr1	6027010	-	CG	0.971503	386
chr1	6027011	+	CG	0.947619	210
chr1	6027012	-	CG	0.937662	385
chr1	6027013	+	CG	0.961905	210
chr1	6027014	-	CG	0.987013	385
chr1	6027053	-	CG	0.884817	382
chr1	6027096	+	CG	0.961373	233
chr1	6027112	+	CG	0.978541	233
chr1	6027113	-	CG	0.63986	286
chr1	6027118	+	CG	0.961373	233
chr1	6027119	-	CG	0.70979	286
chr1	6027175	+	CG	0.454545	231
chr1	6027176	-	CG	0.77931	290
chr1	6027205	-	CG	0.99308	289
chr1	6048026	+	CG	0.959514	247
chr1	6048176	-	CG	0.941489	188
chr1	6072701	-	CG	1	10
chr1	6073509	+	CG	0.858974	78
chr1	6073649	+	CG	0.962025	79
chr1	6073650	-	CG	0.922953	623
chr1	6073656	-	CG	0.87299	622
chr1	6104418	+	CG	0.125	24
chr1	6104419	-	CG	0.957447	47
chr1	6104564	-	CG	0.978723	47
chr1	6139284	-	CG	1	12
chr1	6139315	-	CG	1	10
chr1	6145223	+	CG	0.954545	44
chr1	6145374	-	CG	0.985915	71
chr1	6150858	+	CG	0.926829	246
chr1	6150919	+	CG	0.356223	233
chr1	6150933	+	CG	0.828326	233
chr1	6150934	-	CG	1	11
chr1	6150944	+	CG	0.785408	233
chr1	6150945	-	CG	0.909091	11
chr1	6150950	+	CG	0.0987124	233
chr1	6150951	-	CG	1	11
chr1	6150966	+	CG	0	11
chr1	6150967	-	CG	0.625	16
chr1	6150973	+	CG	0.818182	11
chr1	6150974	-	CG	0.8	5
chr1	6150982	+	CG	1	11
chr1	6150983	-	CG	0.8	5
chr1	6151000	+	CG	1	9
chr1	6151001	-	CG	0.8	5
chr1	6151011	+	CG	0.285714	14
chr1	6151035	+	CG	0.666667	15
chr1	6151036	-	CG	0.97	400
chr1	6151050	+	CG	0.6	15
chr1	6151051	-	CG	0.9725	400
chr1	6151052	+	CG	1	15
chr1	6151053	-	CG	0.955	400
chr1	6151054	+	CG	0.666667	15
chr1	6151055	-	CG	0.955	400
chr1	6151069	+	CG	0.97756	713
chr1	6151070	-	CG	0.98731	394
chr1	6151072	+	CG	0.924476	715
chr1	6151073	-	CG	0.944444	36
chr1	6151132	+	CG	0.895028	724
chr1	6151133	-	CG	0.803571	56
chr1	6151149	+	CG	0.957123	723
chr1	6151150	-	CG	0.945455	55
chr1	6151166	-	CG	0.913793	58
chr1	6151182	-	CG	0.625	8
chr1	6151200	-	CG	0.75	8
chr1	6163576	+	CG	0.964539	282
chr1	6163613	+	CG	0.894737	285
chr1	6163614	-	CG	0.894737	608
chr1	6163673	-	CG	0.947368	608
chr1	6173155	-	CG	1	6
chr1	6213415	+	CG	0.375	48
chr1	6213520	-	CG	0.479042	334
chr1	6214311	+	CG	0.0405405	518
chr1	6214316	+	CG	0.00385356	519
chr1	6214317	-	CG	0.00364964	548
chr1	6214336	+	CG	0.00959693	521
chr1	6214337	-	CG	0.00547445	548
[truncated: 1,046,576+ more rows]
